# Supplementary material
Source: PubMed Central journal article supplement (PMC2639467)
Supplement: gzn050_1.pdf [file gzn050_1.pdf]

**Supplemental Figure 1.** Clustal W alignment of the protein sequence for 100 homologues of the SC PEP protein. Numbers listed in a column on the left correspond to the NCBI database accession number. The name of each protein corresponding to a number is given at the end of the multiple sequence alignment. The SC PEP protein sequence in the first listed (62738741). Perfectly conserved residues are colored in red, strongly similar residues are colored in green, and weakly similar residues are colored in blue. Statistics and Clustal W parameters used are listed at the end of the alignment. Residues mutated in this experiment are highlighted in pink at the beginning of each page. A full list of mutated residues is included at the end of this supplementary file. Residues in that list are specified by SC PEP numbering as well as the ClustalW alignment numbering. With the exception of K407S, I454L, V455I, P473S, R474K, I689V, and I880V, the wild-type residues were mutated to residues shown in the consensus sequence.

|           | 10    | 20    | 30    | 40    | 50    | 60    | 70    | 80    | 90    |
|-----------|-------|-------|-------|-------|-------|-------|-------|-------|-------|
| 62738741  | ----- | ----- | ----- | ----- | ----- | ----- | ----- | ----- | ----- |
| 87200538  | ----- | ----- | ----- | ----- | ----- | ----- | ----- | ----- | ----- |
| 103487461 | ----- | ----- | ----- | ----- | ----- | ----- | ----- | ----- | ----- |
| 87200537  | ----- | ----- | ----- | ----- | ----- | ----- | ----- | ----- | ----- |
| 94496227  | ----- | ----- | ----- | ----- | ----- | ----- | ----- | ----- | ----- |
| 35211243  | ----- | ----- | ----- | ----- | ----- | ----- | ----- | ----- | ----- |
| 32448009  | ----- | ----- | ----- | ----- | ----- | ----- | ----- | ----- | ----- |
| 75906687  | ----- | ----- | ----- | ----- | ----- | ----- | ----- | ----- | ----- |
| 35211187  | ----- | ----- | ----- | ----- | ----- | ----- | ----- | ----- | ----- |
| 67921530  | ----- | ----- | ----- | ----- | ----- | ----- | ----- | ----- | ----- |
| 67930945  | ----- | ----- | ----- | ----- | ----- | ----- | ----- | ----- | ----- |
| 17131625  | ----- | ----- | ----- | ----- | ----- | ----- | ----- | ----- | ----- |
| 86609965  | ----- | ----- | ----- | ----- | ----- | ----- | ----- | ----- | ----- |
| 83859556  | ----- | ----- | ----- | ----- | ----- | ----- | ----- | ----- | ----- |
| 28808634  | ----- | ----- | ----- | ----- | ----- | ----- | ----- | ----- | ----- |
| 75854458  | ----- | ----- | ----- | ----- | ----- | ----- | ----- | ----- | ----- |
| 86607173  | ----- | ----- | ----- | ----- | ----- | ----- | ----- | ----- | ----- |
| 23128197  | ----- | ----- | ----- | ----- | ----- | ----- | ----- | ----- | ----- |
| 91226380  | ----- | ----- | ----- | ----- | ----- | ----- | ----- | ----- | ----- |
| 88711708  | ----- | ----- | ----- | ----- | ----- | ----- | ----- | ----- | ----- |
| 110167745 | ----- | ----- | ----- | ----- | ----- | ----- | ----- | ----- | ----- |
| 109899092 | ----- | ----- | ----- | ----- | ----- | ----- | ----- | ----- | ----- |
| 86144168  | ----- | ----- | ----- | ----- | ----- | ----- | ----- | ----- | ----- |
| 4973227   | ----- | ----- | ----- | ----- | ----- | ----- | ----- | ----- | ----- |
| 6048357   | ----- | ----- | ----- | ----- | ----- | ----- | ----- | ----- | ----- |
| 76875127  | ----- | ----- | ----- | ----- | ----- | ----- | ----- | ----- | ----- |

|          |                                                             |
|----------|-------------------------------------------------------------|
| 216201   | -----MSGKAR-----                                            |
| 88804657 | -----MKHTTAILC--LGLLLTACQNQTE-----                          |
| 89517967 | -----MALVSCEDKK-----                                        |
| 90588230 | -----MKKTFLLEMA--LTTAGISFAQIK-----                          |
| 71143549 | -----MKKQSLFLTSILVTSVLAGCTGN----SVEQTS                      |
| 83855898 | -----MKQLILVTI--TAATIFSKTET-----                            |
| 85710915 | -----MKYVLSAV--AVSVLVACSPAQNDSQTAETQ                        |
| 78368715 | -----MALKTILSKQTLTLLAGLGLTLMGCQY----HAN-                    |
| 56178266 | -----MKYLLGAV--AVSLLTACS-----QNAETE                         |
| 91215481 | -----MKQIVLPLA--ALCLLASCNEGEK-----                          |
| 78688320 | -----MALRFRLAQOGLLVATLGMALAACQSGNTPEEAA-                    |
| 24374294 | -----MALRFRLAQOGLLVATLGMALAACQSGNTPEEAAA                    |
| 456523   | -----MKYNKLSVAVAAFAFAAVSAQNS-----                           |
| 77816782 | -----MAVRFHLAKOGLLVATLGLALGACQSGNTPEQHSV                    |
| 68547790 | -----MTSRISTLSLLTLGFALGLSGCHT----KDAT-                      |
| 82744257 | -----MAVRFHLAKOGLLVATLGLALGACQSGNTPEQHSV                    |
| 86131249 | -----MKKLVLFAL--ATTAIISCNQDAE-----                          |
| 88796133 | -----MKKKLIYAAVVAASAGVTFACSTS----YSNN                       |
| 42526704 | -----                                                       |
| 27367204 | -----                                                       |
| 37676919 | -----                                                       |
| 75855979 | -----                                                       |
| 28809898 | -----                                                       |
| 6460324  | -----MSKPYPQ----SPRG                                        |
| 91223249 | -----                                                       |
| 56180108 | -----MTR--YSAFILCSTVLILSGCSS----FEQE                        |
| 55769741 | -----MGSVAGDAARL-----                                       |
| 47507507 | -----PLSHLYLTAKRVLPVTVSARLLCHAVVFPRPSLCSASLSIPGTMPQQQK----- |
| 28502989 | -----SHLYLTAKRVLPVTVSARLLCHAGVFPRPSLCSASLSISGTMPQQQK-----   |
| 86144914 | -----MSYLK-----                                             |
| 84386759 | -----MSYLK-----                                             |
| 63100723 | -----MA-----                                                |
| 38649021 | -----MPQQQK-----                                            |
| 59711729 | -----                                                       |
| 6755152  | -----MLS-----                                               |
| 74215349 | -----MLS-----                                               |

|           |                                                                             |                                                  |       |
|-----------|-----------------------------------------------------------------------------|--------------------------------------------------|-------|
| 50514023  | -----                                                                       | MLS                                              | ----- |
| 26345256  | -----                                                                       | MLS                                              | ----- |
| 157879458 | -----                                                                       | MLS                                              | ----- |
| 51592147  | -----                                                                       | MLS                                              | ----- |
| 10835490  | -----                                                                       | MLS                                              | ----- |
| 50514022  | -----                                                                       | MLS                                              | ----- |
| 37928243  | -----                                                                       | MLS                                              | ----- |
| 27065055  | -----                                                                       | MLS                                              | ----- |
| 5103285   | -----                                                                       | MLS                                              | ----- |
| 13786144  | -----                                                                       | MLS                                              | ----- |
| 5107662   | -----                                                                       | MLS                                              | ----- |
| 79382269  | MLTAFASHARSHVFAFVTVPTITRRLRINILRQSPLSSSLLLNETFSNRPNVSRRRCYCSSSAIMGSSSVFGEQL |                                                  | ----- |
| 27066372  | -----                                                                       | MLS                                              | ----- |
| 19347837  | -----                                                                       | SLLLLNETFSNRPNVSRRRCYCSSSAIMGSSSVFGEQL           | ----- |
| 109072195 | -----                                                                       | MLS                                              | ----- |
| 11691900  | -----                                                                       | MLS                                              | ----- |
| 41349456  | -----                                                                       | MLS                                              | ----- |
| 558596    | -----                                                                       | MLS                                              | ----- |
| 53127346  | -----                                                                       | MQA                                              | ----- |
| 904214    | -----                                                                       | MLS                                              | ----- |
| 15217929  | -----                                                                       | MGSLPAFEERL                                      | ----- |
| 9558588   | -----                                                                       | MGSLPAFEERL                                      | ----- |
| 38345850  | -----                                                                       | MGSLPAADKPLPA                                    | ----- |
| 91082735  | -----                                                                       | MS                                               | ----- |
| 54650756  | -----                                                                       | MHTIFRGPLLYRRICQIVVPKTLPRNYIHRELP SNLTRAMPSTLSAK | ----- |
| 73973662  | -----                                                                       |                                                  | ----- |
| 73973660  | -----                                                                       |                                                  | ----- |
| 47222200  | -----                                                                       | MA                                               | ----- |
| 73973664  | -----                                                                       |                                                  | ----- |
| 55235507  | -----                                                                       | Q                                                | ----- |
| 73973658  | -----                                                                       |                                                  | ----- |
| 71666762  | -----                                                                       | MR                                               | ----- |
| 49523575  | -----                                                                       | MR                                               | ----- |
| 71747962  | -----                                                                       | MR                                               | ----- |
| 33317309  | -----                                                                       | MR                                               | ----- |
| 47224662  | -----                                                                       |                                                  | ----- |

15291259 -----MPSTLSAK-----  
 73973656 -----

Prim.cons. MLTAFASHARSHVFAFVTVPT2222R2332HLYL2A2RLL323232N2P3S32RMMMKKTLAA2GLLAAT2LLMLSAAQSGNTPEAAAA

|           | 100          | 110            | 120       | 130           | 140           | 150      | 160      | 170      | 180              |                     |      |
|-----------|--------------|----------------|-----------|---------------|---------------|----------|----------|----------|------------------|---------------------|------|
| 62738741  | DQAMPSLPP    | -----YPASPQV   | PLVEDHFG  | -----EKVSDP   | PWRWLEADV     | RTDAKVA  | AAWVQAQ  | SAYTAAYL | KQLPE-RAALEK     | RYKA                |      |
| 87200538  | AEAAPAAMK    | -----YPQTERG   | TVVETAFG  | -----EKVADPYR | WLEADV        | RVPKVA   | AAWVDAQ  | SRFTDAYL | KALPE-RPAFEQ     | RLKT                |      |
| 103487461 | ASAPAAALA    | -----YPDTARG   | DTVDPQFG  | -----VDVADPYR | WLEDDV        | RVNPEVA  | AAWVEAQ  | NRVTDAYL | DTLPG-RDAFRAR    | MTTE                |      |
| 87200537  | ARLFLPRGA    | -----YPETRRD   | GLVEQVFG  | -----QRVADPYR | WLEADPR       | GAGVAG   | WIARQNA  | LSDADYL  | LAKLPG-RERLATR   | IRA                 |      |
| 94496227  | IAASDPALR    | -----YPLARRQ   | DIVEDHFG  | -----VPVADPYR | WLENDLR       | ADPAVRD  | WVARENA  | LTRRYLD  | DALPG-REALKAR    | LQA                 |      |
| 35211243  | --LAASAPR    | -----LTYPPTERV | EQFDDYHG  | -----TRVADPYR | WLEDP--       | NSPKTR   | AWVEAQ   | NKVTFA   | YLEGIPY-REPLKER  | LTK                 |      |
| 32448009  | DEPTASSSR    | -----MKLEYP    | VSRRD-EV  | VDDYHG        | -----REVADPYR | WLEDDV   | --ESDETA | AAWVEAQ  | NEVTQSYL         | QSLPQ-RESMRAR       | LEA  |
| 75906687  | --MPYSEKS    | -----LNYPLSHKI | DQVDDYHG  | -----TLVADPYR | WLEDP--       | DSETTRA  | WIEAQ    | NQVTF    | FAYLGEVST-REKI   | QQRLNK              |      |
| 35211187  | ----MTSP     | -----FTYPPS    | RRD-DQ    | VDDYHG        | -----TPVADPYR | WLEDA--  | ESPGTK   | AWVEAQ   | NQVTF            | GFLETIPE-REAIRER    | LTH  |
| 67921530  | ----MSPN     | -----FSYPSS    | PQQ-DV    | TDVYHG        | -----VEIKDSYR | WLENP--  | DSEETK   | VWITA    | QNKLT            | FDYLSTISA-REKIKQ    | RLTK |
| 67930945  | MPRLNYPAA    | -----PQS---    | GQTDAYHE  | -----VQIADPYR | GLENA--       | DAPETR   | KWVEDEN  | ALTQSWL  | GKQPD-RAPIRK     | QLTK                |      |
| 17131625  | --MPYSEKS    | -----LNYPLSHKI | DHVDDYHG  | -----TLVADPYR | WLEDP--       | DSEKTR   | VWIEAQ   | NQIT     | FAYLGEVSI-REKI   | QQRLNK              |      |
| 86609965  | -----M-----  | LNYPPSY        | PDPTVV    | DIYHG         | -----QAVPDPYR | WLEDDL-- | DSEQTRA  | WIEAQ    | NHLTFN           | YLQQIPA-RQRIRER     | LITQ |
| 83859556  | SEASGPAMTQI  | ---AAPVYP      | PETRTV-EQ | VDDYASAA      | EGEVAVSD      | DPYRWLE  | QDVRV    | SEDVAN   | WVEAQTE          | VTNAYLDQLPG-RERIAAR | LAE  |
| 28808634  | -EAAQSSVEQV  | TPKAITYP       | TTQKV-DV  | VDDYFG        | -----TKMSDPYR | WLEDD--  | LSPETA   | AEWVKA   | QNAVTF           | DYLSKIPY-REQIEER    | LITK |
| 75854458  | -EAAQSSVEQV  | TPKAITYP       | TTQKV-DV  | VDDYFG        | -----TKVSDPYR | WLEDD--  | LSLETA   | AEWVKA   | QNALTF           | DYLSKIPY-REQIEER    | LITK |
| 86607173  | -----M-----  | LNYPPSH        | PDPTVV    | DFYHG         | -----QAVPDPYR | WLEDDL-- | DSEQTRA  | WIEAQ    | NRLTFD           | YLQRIIPA-RQRLLER    | LIRQ |
| 23128197  | --MPSSTKP    | -----ITYPSS    | SHKS-NQ   | IDNYHG        | -----TLVTDSYR | WLEDP--  | DSEETRA  | WIEAQ    | NQIT             | FGYLSEIPA-REKIKQ    | RLTK |
| 91226380  | -EAAQSSVEQV  | SPKAITYP       | TTQKV-DI  | VDDYFG        | -----TKVSDPYR | WLEDD--  | LSPETA   | AEWVKA   | QNAVTF           | DYLAKIPY-REQIEER    | LITK |
| 88711708  | --KDP-----   | ITVNYPT        | TTTKA-DS  | VDTYFG        | -----TEVKDPYR | WLEDD--  | RSPETE   | AWVKEQ   | NSTTF            | GYLEKIPF-RDGLKKR    | LEK  |
| 110167745 | --MKEKKQP    | -----LTYPI     | TEKT-DT   | VENYHG        | -----VEVADPYR | WLEDP--  | NLEKTK   | EWVKSQ   | NEITFN           | YLAEISE-GETIKKR     | LTK  |
| 109899092 | TMKTSITSNQL  | -QEMNLSY       | PKTQKG-D  | VIDTYFG       | -----KQVADPYR | WLEDD--  | MSSETE   | QWVKA    | ENAVTQ           | AYLAQVPS-RDKLKR     | LKV  |
| 86144168  | --KKSPE----- | MAVTYP         | PETKKV-DT | VDTYFG        | -----TEVPDPYR | WLEDD--  | RSAETA   | AWVKA    | ENKATF           | GYLDKIPF-KDEIKQK    | LEK  |
| 4973227   | -----LHYPV   | TRQG-EQ        | VDHYFG    | -----QAVADPYR | WLEDD--       | RSPETE   | AEWVKA   | QNAVTF   | DYLAQIPY-RAAIKEK | LAA                 |      |
| 6048357   | -----LHYPV   | TRQG-AQ        | VDHYFG    | -----QAVADPYR | WVEDD--       | RSPETE   | AEWVKA   | QNAVTF   | DYLAQIPY-RAAIKEK | LAA                 |      |
| 76875127  | EAKAPMS----- | QANSVN         | YPVTKKG-N | VVDNYFG       | -----ETLADPYR | WLEDD--  | MSAETA   | NWVKA    | QNKVTF           | SYLEQIPY-RDKLKQ     | RLK  |
| 216201    | -----LHYPV   | TRQS-EQ        | LDDHYFG   | -----QAVADPYR | WLEDD--       | RSPETE   | AEWVKA   | QNRVTQ   | DYLAQIPF-RDAIKGK | LAT                 |      |
| 88804657  | --TN-----    | MAINYP         | PETAKV-DT | VDTYFG        | -----TEVADPYR | WLEDD--  | RSPETE   | DWVRRQ   | NAVTF            | GYLDGIPY-REALRQ     | LEK  |

89517967 --QDSKK-----MTVYPTTQKV-DHVDNYHG-----TDVQDPYRWLEDD--RSAETGEWVKSQNKVTNSYLDQIRF-RESVKNRLTE  
90588230 ---Y-----PETKKG-ETVDVYFD-----TKVSDPYRWLEDD--KSAETGAWVKAENEVITYGLDKIPF-REELKKRMEK  
71143549 KVAAAQK-----QTQKISYPVTKKG-DVVDTFFG-----TDVADPYRWLEDD--RSEETGAWVKAENKVTFDYLSQIPY-RGQLKSRLAE  
83855898 --KTDRT-----IAVTYPETKKV-DTVDVYFG-----NEVKDPYRWLEDD--RSKETEDWVKAQNQATFGYLDKIPF-REDLKNRLTE  
85710915 QVEKQQAG-----SMQVKYPETRKG-DTVDTYFD-----TKVKDPYRWLEDD--RSAETEAWVEAQNEVTFNHLEKIPF-RDKIEKRLTE  
78368715 --ETAAAQA-----AVQPQG-----VVETIHG-----VQVADPYRYLEE---ESDATHAWVKQQQQAGHDFLAQLEN-KQAIIVDRITE  
56178266 QEANTQS-----MSYPETRKG-DVVDTYFG-----TEVADPYRWLEDD--RSEETENWVKAQNEVTFAHLESIPY-RETIEKRLTE  
91215481 --NQ-----ANLTYPETKQV-DTVDTYFD-----TEVKDPYRWLEDD--RNAETEDWVKAQNEVTFGYLDSIPF-RNKLKERLSK  
78688320 --QQVSANK-----LVYPETRKD-NLVETIHG-----VAVADPYRHLEE---NTPETESWVKEQQAFGQAYLAKIPN-KQAVVDRITE  
24374294 --QOISANK-----LVYPETEKD-ALVETIHG-----VAVADPYRHLEE---NTPETESWVKEQQAFGQAYLAKIPN-KQVVVDRITE  
456523 ---N-----VLKYPETKKV-SHTDTYFG-----TQVSDPYRWLEDD--RAEDTKAWVQQEVKFTQDYLAQIPF-RDQLKKQLMD  
77816782 EVQQASSNK-----FVYPETDKD-DLVETIHG-----ISVADPYRHLEA---NTPETEKWVKTQQAFGQEYLAQIPN-KQAVVERITE  
68547790 --VDAPVAA-----IAYPASQTV-AISEQIHG-----VEVQDPYRWLEE---SSPETEDWVKRQQAFGEEYLAAIPN-KQVVVDRITE  
82744257 EVQQASSNK-----FVYPETDKD-DLVETIHG-----ISVADPYRHLEA---NTPETEKWVKTQQAFGQEYLAQIPN-KQAVVERITE  
86131249 --KQSTS-----MAVYTETTKV-DTVDTYFG-----TEVQDPYRWLEDD--RSEETMDWVKRENNTTQDYLKNIPF-RAELKDRLAT  
88796133 AEPAKSEMQHTAMPTVSSYPETKTVAQQ-DNYHG-----TTVSDPYRWLEE---ESEEVNAWVEAQNELARPYLAELSS-KALYKERLTA  
42526704 -----MQYKKS-DVSDNYFG-----TIVPDPYRWLEDD--NAPEVIAWVKEENKKTEDFLSKISF-RGELKKRLEE  
27367204 -----MQYIKTRKD-PIVDHYFG-----HAVADPYRWLEDD--RSAETTEWVSGQNAITFDYLGQIGF-RQQLREQIAA  
37676919 -----MQYIKTRKD-PIVDHYFG-----HAVADPYRWLEDD--RSAETTEWVSGQNAITFDYLGQIGF-RQQLREQIAA  
75855979 -----MHYPKTRKD-SVVDTYFG-----HDIADPYRWLEND--RSEETAQWVSGQNSVTFDFLGQIPY-RQQIRDLVAN  
28809898 -----MHYPKTRKD-SVVDTYFG-----HDIADPYRWLEDD--RSEETAQWVSGQNSVTFDFLGQIPY-RQQIRDLVAN  
6460324 DHVDVYQNA----AGQEVVVP-----DPYRWLEDP--DSPETRRWVEAQNAVTEDFLAALPA-RAAYRERLTA  
91223249 -----MHYPKTRKD-SVVDTYFG-----HDIADPYRWLEDD--RSEETAQWVSGQNSVTFDFLGQIPY-RQQIRDLVAN  
56180108 KEQPK-----GPYPETKTVEQQ-DDYHG-----TRVEDPYRWLEQ--DNQEVSNWVDAQNQLSTPLLQNLPA-FADIKDRMTE  
55769741 -----SYPPTRRDNSVVDMYHG-----VPVADPYRWLEDP--ESEDTKAFVVEAQNKLTMPLEQCPVR-RLFKDRMTE  
47507507 -----IQYPEAARDNCAVDNYHG-----VKMCDPYRWLEDP--DSEQTKAFVVEAQNKLTMPLEQCPVR-RLFKDRMTE  
28502989 -----IQYPEAARDNCAVDNYHG-----VKMCDPYRWLEDP--DSEQTKAFVVEAQNKLTMPLEQCPVR-RLFKDRMTE  
86144914 -----EYQYPVTNKQ-IVSDDYFG-----QIIEDPYRWLEDD--RSDETAQWVASQNEVTFDYLAQIPY-RAELRERLAK  
84386759 -----EYQYPIITNKQ-IVSDDYFD-----HIVEDPYRWLEDD--RSDETAQWVASQNEVTFDYLAQIPY-SAELRERLAK  
63100723 -----FQYPNVYRDESVVDDYHG-----CKIPDPYSWLEDP--DSEKTAQFVNAQNQLTLPFLEQCETR-DLFKERMTE  
38649021 -----IQYPAARDDCAVDNYHG-----VKMCDPYRWLEDP--DSEQTKAFVVEAQNKLTMPFLEKCPVR-RLFKDRMTE  
59711729 -----MIYPFTKQD-STVDHYFS-----HAIADPYRWLEDD--RSEETEAWVNKQNDVTFDYLSHIDF-RDDIRDLIAK  
6755152 -----FQYPDVYRDETSVQEYHG-----HKICDPYSWLEDP--DSEQTKAFVVEAQNKITVPFLEQCPVIR-GLYKERMTE  
74215349 -----FQYPDVYSDETSVQEYHG-----HKICDPYSWLEDP--DSEQTKAFVVEAQNKITVPFLEQCPVIR-GLYKERMTE  
50514023 -----FQYPDVYRDETAIQDYHG-----HKVCDPYAWLEDP--DSEQTKAFVVEAQNKITVPFLEQCPVIR-GLYKERMTE  
26345256 -----FQYPDVYRDETSVQEYHG-----HKICDPYSWLEDP--DSEQTKAFVVEAQNKITVPFLEQCPVIR-GLYKERMTE

157879458 -----FQYPDVYRDETAIQDYHG-----HKVCDPYAWLEDP--DSEQTKAFVEAQNKITVPFLEQCP IR-GLYKERMTE  
51592147 -----FQYPDVYRDETAIQDYHG-----HKVCDPYAWLEDP--DSEQTKAFVEAQNKITVPFLEQCP IR-GLYKERMTE  
10835490 -----FQYPDVYRDETAIQDYHG-----HKVCDPYAWLEDP--DSEQTKAFVEAQNKITVPFLEQCP IR-GLYKERMTE  
50514022 -----FQYPDVYRDETAIQDYHG-----HKVCDPYAWLEDP--DSEQTKAFVEAQNKITVPFLEQCP IR-GLYKERMTE  
37928243 -----FQYPDVYRDETAIQDYHG-----HKVCDPYAWLEDP--DSEQTKAFVEAQNKITVPFLEQCP IR-GLYKERMTE  
27065055 -----FQYPDVYRDETAIQDYHG-----HKVCDPYAWLEDP--DSEQTKAFVEAQNKITVPFLEQCP IR-GLYKERMTE  
5103285 -----FQYPDVYRDETAIQDYHG-----HKVCDPYAWLEDP--DSEQTKAFVEAQNKITVPFLEQCP IR-GLYKERMTE  
13786144 -----FQYPDVYRDETSVQDYHG-----HKICDPYAWLEDP--DSEQTKAFVEAQNKITVPFLEQCP IR-GLYKERMTE  
5107662 -----FQYPDVYRDETAIQDYHG-----HKVXDPYAWLEDP--DSEQTKAFVEAQNKITVPFLEQXPIR-GLYKERMTE  
79382269 -----QYPATRRDSSVVDYHG-----VKIGDPYRWLEDP--DAEEVKEFVQSQVKLTDSVLEKCET-KEKLRQNI TK  
27066372 -----FQYPDVYRDETAIQDYHG-----HKVCDPYAWLEDP--DSEQTKAFVEAQNKITVPFLEQCP IR-GLYKERMTE  
19347837 -----QYPATRRDSSVVDYHG-----VKIGDPYRWLEDP--DAEEVKEFVQSQVKLTDSVLEKCET-KEKLRQNI TK  
109072195 -----LQYPDVYRDETAIQDYHG-----HKICDPYAWLEDP--DSEQTKAFVEAQNKITVPFLEQCP IR-GLYKERMTE  
11691900 -----FQYPDVYRDETAIQDYHG-----HKICDPYAWLEDP--DSEQTKAFVEAQNKITVPFLEQCP IR-GLYKERMTE  
41349456 -----LQYPDVYRDETAIQDYHG-----HKICDPYAWLEDP--DSEQTKAFVEAQNKITVPFLEQCP IR-GLYKERMTE  
558596 -----FQYPDVYRDETAIQDYHG-----HKICDPYAWLEDP--DSEQTKAFVEAQNKITVPFLEQCP IR-GLYKERMTE  
53127346 -----FQYPEVYRDEAAVLDYHG-----HQISDPYCWLEDP--DSEQTKAFVEAQNKITVPFLEQCP VR-GLFKERMTE  
904214 -----FQYPDVYRDETAIQDYHG-----HKICDPYAWLEDP--DSEQTKAFVEAQNKITVPFLEQCP IR-GLYKERMTE  
15217929 -----QYPTARRDES VVEDYHG-----VKVSDPYRWLEDP--DAEEVKEFVEKQVQLSDSVLKS CET-KEKLHDKF TK  
9558588 -----QYPTARRDES VVEDYHG-----VKVSDPYRWLEDP--DAEEVKEFVEKQVQLSDSVLKS CET-KEKLHDKF TK  
38345850 -----LRYPPARRDDDIVDDYHG-----VTVPDPYRWMEEL--ESEEVKGFVDAQAAVAEAVLSTCDDHRVRLRGQLTA  
91082735 -----FKYPDARRDETVKDN YFG-----TEITDPYRWLEDP--DSEETKKYVDGQNAVTRPYLDGCSF-KESIKKKI TQ  
54650756 -----LAYPVARKDESVAEDFHG-----TQIKDVYRWLEDP--DSTETEEFVNAQNSISRPFL ENGEE-WKKLNTKLTK  
73973662 -----MTE  
73973660 -----MTE  
47222200 -----FKYPTARRDEAKVDDYHG-----NKICDPYAWLEDP--DGAETMAFVEEQNKLTMPFLEQCGVR-DRFRQRLTE  
73973664 -----MTE  
55235507 -----FVYPAARRDES VVEEFHG-----VKIADPYRWLEDP--DAEETQAYVEKQNEISKPF LDTCPE-WKKLNEKLRK  
73973658 -----MTE  
71666762 -----SVYPLARRS-MAAYTMHN-----MTVPEPYDYLEDP--ENPETKTFVNEQNAFFEEYF ASEAELRKKIFESISN  
49523575 -----LAYPTARRS-AASYVLHN-----VTVPEPYDYLEDP--ENNETKSFVKAQNDLFG EYMRSTEALGNKLYNRISQ  
71747962 -----LAYPTARRS-AASYVLHN-----VTVPEPYDYLEDP--ENNETKSFVKAQNDLFG EYMRSTEALGNKLYNRISQ  
33317309 -----SVYPLARRS-MAAYTMHN-----MTVPEPYDYLEDP--ENPETKTFVNEQNAFFEEYF ASEAELRKKIFESISN  
47224662 -----MASAEG--TLHSDN ISD  
15291259 -----LAYPVARKDESVAEDFHG-----TQIKDVYRWLEDP--DSTETEEFVNAQNSISRPFL ENGEE-WKKLNTKLTK  
73973656 -----MTE

Prim.cons. AEEAASSNAQVAQPMAFQYPDTRRDEDDVDDYHGAAEGEHKVADPYRWLEDPVRDSEETKAWVEAQNKVTFPYLEQIPIRRELLKERLITE

190 200 210 220 230 240 250 260 270  
| | | | | | | | |  
62738741 LIDYERFGLPQR-----RGASVFFYSWNSGLMNQSQLLVRPADAP--VGTKG-RVLLDPNTWAKDGATALDAWAASDDGRLLAYSVQD  
87200538 LFDFERFGLPVK-----AGDLLFFRHNSGLQNQSVLYVRKADG---SGER--RVLIDPNGWAKDGATALDDWQPSDGTQVAYSQD  
103487461 LYDYERFGLPTK-----AGARYFYTRNDGLQPQSVLYVREGLK---GEG--RVLIDPNLWARDGATALAEWEPSEDGKYLAYAVQD  
87200537 LFDFFERYGLPRK-----AGRSYFYTRNTGLQNQSALWVRRGLD---GEQ--RLLVDPNLWSADGSLALAEWEPSPSGRYLAIAEQE  
94496227 LFAHGRYTVPRK-----AGDRYFYGYNRGLENQTPLYVREGLT---GRQ--RLLDPNLSWAQDGASALAEWTPSPDGRMLAYGVQD  
35211243 IWNKYGIPNREG-----DRFFFYTRNSGLQNQSVLYNAAKLG---DAP--RVLIDPNLTLKSDGTVALTGIDITDDGRYLAYGTAA  
32448009 LWDYSRTGLPAK-----RGETYFYTFNDGLQNQSVLYRTPVDVPPSQWEANREVLIDPNKLSDDGTVALSGLAISDNGKLLAYGIAT  
75906687 LWDYEKYGIPFKEG-----ENYFYFKNDGLQNQSVLYTLKSLD---SEP--RVLIDPNKLSDDGTVALSGLAISDNGKLLAYGIAT  
35211187 IWNERYGTPFREG-----GRYFLFKNTGLQNQSVLYTVPDLE---GEL--RLLIDPNALSADGTVALSGLAVSDDGKYLAYGTSA  
67921530 LWDYEKYGIPFKKA-----DRYFYFKNNGLQNQSVLYTIKSLD---GDP--KILLDPNTITTTDGTVALSVLSISENAQYLAYGLST  
67930945 LWNKYEGTLFK-----AGPHYFYSYNTGLQNQSVFVADSPN---AKG--KELIDPNTHRKGTAALSGWSVSRNGKLYGYAIAE  
17131625 LWDYEKYGIPFKEG-----ENYFYFKNDGLQNQSVLYTLKSLD---SEP--RVLIDPNKLSDDGTVALSGLAISNNGKLLAYGIST  
86609965 LWNKYKYSQPFFKEG-----GRYFYFKNDGLQNQSVLYTQESLE---AEA--RVLIDPNTFSEDGTVALAGIAISRDRYLAYGLSR  
83859556 LWNERYGLPTTRE----TEDGLRYFFSRNDGLQDQSVFMVQDGLE---GEA--RPLIDPNEWAADGTTALAGTVPSPDGTKLAYLIAD  
28808634 LMDYEQSQPFFK-----EGRFTYFYKNDGLQNQDVLRYRQLGDGDAE-----IFLDPNTFSEDGTTSLAGVSFSDGSLVAYSISE  
75854458 LMDYEQSQPFFK-----EGKFTYFYKNDGLQNQDVLRYRQLGDGEAE-----IFLDPNTFSEDGTTSLAGVSFSDGSLVAYSISE  
86607173 LWNKYKYSQPFFKEG-----NRYFYFKNDGLQNQSVLYTQESLE---GEA--RVLIDPNLTLSEDGTVALSGIAISRDRYLAYGLSR  
23128197 LWDYEKYGIPFKEGKSLQDGSTERYFYFKNNGLQNQSVLYTLKTLD---NQP--KVLIDPNQLSEDGTIALSGLSISENGKLLAYGLST  
91226380 LMDYEQSQPFFK-----EGKFTYFYKNDGLQNQDVLRYRQLGDGEAE-----IFLDPNTFSEDGTTSLAGVSFSDGSLVAYSISE  
88711708 LWNKYKLGSPFFK-----EGDYTYFYKNDGLQNQYVLYRQKDSKEP---E---VFLDPNTFSEDGTTSLAGLRFKTDGSKAAYLISE  
110167745 IWDYEKYSVPFFKEG-----DRYFYKNDGLQNQSILYTLPTLD---AEP--KVLIDPNQFSEDGTVALSGIAISKDGKYIAYGISK  
109899092 LLDYEKVGAPFFK-----EGKYTYFFKNDGLQNQAVLYRQLDDGDAQ-----VFLDPNSFSDGTVALSGLASIDFSDGSLVITYLISE  
86144168 IWNKYKIGAPFFK-----EGDYTYFYKNDGLQNQYVLYRYKTGEDPSTA-E---VFLDPNTFAEDGTVALSGLSFSDDNGKLAAYSISE  
4973227 SWNYAKEGAPFR-----EGRYHYFFKNDGLQNQNVLWRQKEGKPAE-----VFLDPNTLSPDGTALDQLSFSRDGRILAYSLSL  
6048357 SWNYAKEGAPFR-----EGRYHYFFKNDGLQNQNVLWRQKEGKPAE-----VFLDPNTLSPDGTALDQLSFSRDGRILAYSLSL  
76875127 LMNYEKIGAPFT-----EGDYTYFYKNDGLQNQYVLYRSKEGGDVE-----VFLDPNTFSDGTVALSGLSFSRDGSLAYQISE  
216201 SWNYAKEGAPFR-----EGRYHYFFKNDGLQNQNVLCGQLAGKPAE-----VFLDPNLLSPDGTALDQLSFSRDGKTLAYSLSL  
88804657 LWNKYKLGTPFFK-----EGGKTYFYKNDGLQDQYVLYRQGETGDP---E---VFLDPNTFSEDGTTSLAGLSFTEDGSRVAYSISE  
89517967 LWNKYKIGAPFI-----EGDYSYFYKNDGLQNQYVLYRFPNTNGKMEDA-E---VFLDPNQFSKDGTTSLGGTSFTKDGS LFAYAISE  
90588230 LWNKYKIGAPFFK-----EGKFTYFYKNDGLQNQSVLYRQDQSGKE---E---VFLDPNTFSEDGTTSLGGLDFSKDGSIAAYAISE  
71143549 LWNKYKVGAPFFK-----KGDYSYFYKNDGLQNQYVLYRQKEGGTAE-----LFLDPNTFSEDGTTSMGQLSFSKDGSIAAYAISE

83855898 LWNYEKLGSPPFK-----EGEYTYFYFKNNGLQNQSVIYRYKSTESPENA-K---VF~~LD~~PNKFS~~EDG~~T~~SL~~GGLN~~FS~~SKDGSKAAYSISE  
85710915 LWNYEKVSAPFK-----EGDYTYYYYKNDGLQNQYVYRKKNDSDDEE-----VF~~LD~~PNTF~~SEDG~~T~~SLA~~QLTF~~SEDG~~KLAAYSISE  
78368715 LWNFEKVTAPNERG-----DNTFYRNDGLQAQSVLY-VKNKA----GEE--KVAL~~DP~~NSF~~STDG~~TVALSGVSVSGDGKIIAYGVSK  
56178266 LWNYEKISAPFK-----EGDYTYFYKNDGLQNQYVYRQKGDDEPE-----VF~~LD~~PNTF~~SEDG~~T~~SLA~~QLTF~~SDDG~~SLAAYSISE  
91215481 VWNYEKIGAPFE-----RGKYTYFSKNDGLQNQYVYRYKNEDSIENA-E---VF~~LD~~PNTF~~SDDG~~T~~SLAG~~MSF~~TEDG~~ETLAYSISE  
78688320 LWNYEKISAPFENG-----DNQFYRNDGLQAQSVLY-VKGD----GVE--KPV~~LD~~PNGF~~SADG~~TVALSGVSVSNDGKILAYGVSQ  
24374294 LWNYEKISAPFENG-----DNQFYRNDGLQAQSVLY-VKGD----GVE--KAV~~LD~~PNF~~SADG~~TVALSGVSVSNDGKILAYGVSK  
456523 IWNYEKISAPFK-----KGKYTYFSKNDGLQAQSVLYRKDAAGKTE-----VF~~LD~~PNKF~~SEKGT~~TS~~SLAS~~VSFNKKGTLVAYSISE  
77816782 LWNYEKVSAPFEHG-----ENQFYRNDGLQAQSVLY-VKGRD----GVE--KPI~~LD~~PNKLST~~NGT~~VALSGVSVSNDGKILAYGVSQ  
68547790 LWNFEKVGAPFEHG-----ENRFIFRNDGLQSQNVLY-VSEKQ----GDE--RVL~~LD~~PNTLS~~SADG~~TVALSGVSVSGDGKTLAYGVSK  
82744257 LWNYEKVSAPFEHG-----ENQFYRNDGLQAQSVLY-VKGRD----GVE--KPI~~LD~~PNKLST~~NGT~~VALSGVSVSNDGKILAYGVSQ  
86131249 LWNYEKVGSPPFK-----EGDYTYFYKNDGLQNQYVYRYKTGEDPSTA-T---VF~~LD~~PNTFA~~EDGT~~ISLGGASF~~SEDG~~SILAYAISE  
88796133 LWDYEKYSTPYMVN-----DKLFYTYNNDGLQNQYVLYMADGLN----GKP--EVL~~LD~~PNTLS~~SDDG~~TVSMAS~~TELSPK~~ASYLAYMLSD  
42526704 IWWDYEKRSGLFK-----AGNFYFFRTEGLQNQSIMCRQSGNIKAESSPE---VF~~FD~~PNKLSA~~DGT~~TALKNLAF~~SKD~~GKYMAYSVSG  
27367204 SQDYEKSSQPFV-----HGEYTYFYKNDGLQNQSVLYRRKGDEAAQ-----VF~~LD~~PNGF~~SDDG~~T~~SLSG~~VFF~~SKD~~DSLVAITISE  
37676919 SQDYEKSSQPFV-----HGEYTYFYKNDGLQNQSVLYRRKGDEAAQ-----VF~~LD~~PNGF~~SADG~~T~~SLSG~~VFF~~SKD~~DSLVAITISE  
75855979 SQNYEKYSQPFL-----RGDYTYFYKNDGLQNQSVLYRRKGEGEAE-----VF~~LD~~PNTF~~SEEG~~T~~SLGE~~VSF~~SKD~~YRLVAYSISE  
28809898 SQNYEKYSQPFV-----RGDYTYFYKNDGLQNQSVLYRRKGEGEAE-----VF~~LD~~PNTF~~SEEG~~T~~SLGE~~VSF~~SKD~~YRLVAYSISE  
6460324 LWDYPRDGLPWE-----RGGRYFRFTNPGLLNQPVLQ--TADSPRGPWHE----L~~LD~~PNALS~~SADG~~TVALMGASVSDGTQLAYATQS  
91223249 SQNYEKYSQPFV-----RGDYTYFYKNDGLQNQSVLYRRKGEGEAE-----VF~~LD~~PNTF~~SEEG~~T~~SLGE~~VSF~~SKD~~YRLVAYSISE  
56180108 LWNYEKVSTPFRYA-----DRYFYFANDGLQNQSVLYTMTDLN----SAP--DIL~~IN~~PNNF~~SDDG~~TVSLARIN~~VS~~PATYVAYATSD  
55769741 LFDHPRHGAPFR-----RGNKYFYFNSGLQAQSVLYVQDSLGD-----EA~~EVL~~~~LD~~PNALS~~SKDG~~TVALSTYSV~~SKD~~GKIAYGLSE  
47507507 LYDYPKYS~~CN~~FK-----KGKRYFYFYNSGLQNQRVLYVQDSLKD-----E~~PR~~V~~LD~~PNTF~~SEDG~~TVALQGYAF~~SDDG~~EYFAYGLSA  
28502989 LYDYPKYS~~CN~~FK-----KGKRYFYFYNSGLQNQRVLYVQDSLKD-----E~~PR~~V~~LD~~PNTF~~SEDG~~TVALQGYAF~~SDDG~~EYFAYGLSA  
86144914 AQDYKKSSQPFV-----RGDYTYFYKNDGLQNHSILYRQKEGLQVE-----VF~~LD~~PNTF~~SEDG~~T~~SLGS~~VSF~~SKD~~YGLVAYSISE  
84386759 AQDYKKSSQPFV-----RGEYTYFYKNDGLQNHSILYRHKEGQEE-----IF~~LD~~PNTF~~SEDG~~T~~SLGS~~VSF~~SKD~~YSLVAYSISE  
63100723 LYDYPKYS~~CP~~FK-----RGDRYFHFYNTGLQNQSVMYVQDNLDA-----E~~PT~~V~~LD~~PNTF~~SEDG~~TVALRGYSF~~SEDG~~EFLAYGTSA  
38649021 LYDYPKYS~~CN~~FK-----KGNRYFYFYNSGLQNQRVLYVQDSLKD-----E~~PK~~V~~LD~~PNTF~~SEDG~~TVALQGYAF~~SEDG~~EYFAYGLSA  
59711729 GQDYQKTSQPFK-----RGEYTYFYQNDGLQNQSVLYRSKEGKDVE-----VF~~LD~~PNTF~~SEEG~~T~~SLSV~~VSF~~SKD~~ASLVAYSISE  
6755152 LYDYPKYS~~CH~~FK-----KGKRYFYFYNTGLQNQRVLYVQDSLEG-----E~~AR~~V~~LD~~PNTLS~~SDDG~~TVALRGYAF~~SEDG~~EYFAYGLSA  
74215349 LYDYPKYS~~CH~~FK-----KGKRYFYFYNTGLQNQRVLYVQDSLEG-----E~~AR~~V~~LD~~PNTLS~~SDDG~~TVALRGYAF~~SEDG~~EYFAYGLSA  
50514023 LYDYPKYS~~CH~~FK-----KGKRYFYFYNTGLQNQRVLYVQDSLEG-----E~~AR~~V~~LD~~PNIL~~SDDG~~TVALRGYAF~~SEDG~~EYFAYGLSA  
26345256 LYDYPKYS~~CH~~FK-----KGKRYFYFYNTGLQNQRVLYVQDSLEG-----E~~AR~~V~~LD~~PNTLS~~SDDG~~TVALRGYAF~~SEDG~~EYFAYGLSA  
157879458 LYDYPKYS~~CH~~FK-----KGKRYFYFYNTGLQNQRVLYVQDSLEG-----E~~AR~~V~~LD~~PNIL~~SDDG~~TVALRGYAF~~SEDG~~EYFAYGLSA  
51592147 LYDYPKYS~~CH~~FK-----KGKRYFYFYNTGLQNQRVLYVQDSLEG-----E~~AR~~V~~LD~~PNIL~~SDDG~~TVALRGYAF~~SEDG~~EYFAYGLSA  
10835490 LYDYP~~K~~YS~~CH~~FK-----KGKRYFYFYNTGLQNQRVLYVQDSLEG-----E~~AR~~V~~LD~~PNIL~~SDDG~~TVALRGYAF~~SEDG~~EYFAYGLSA



50514022 LYDCPKYSCHFK-----KGKRYFYFYNTGLQNQRVLYVQDSLEG-----EARVFLDPNILSDDGTVALRGYAFSEDGEYFAYGLSA  
 37928243 LYDYPKYSCHFK-----KGKRYFYFYNTGLQNQRVLYVQDSLEG-----EARVFLDPNILSDDGTVALRGYAFSEDGEYFAYGLSA  
 27065055 LYDYPKYSCHFK-----KGKRYFYFYNTGLQNQRVLYVQDSLEG-----EARVFLDPNILSDDGTVALRGYAFSEDGEYFAYGLSA  
 5103285 LYDYPKYSCHFK-----KGKRYFYFYNTGLQNQRVLYVQDSLEG-----EARVFLDPNILSDDGTVALRGYAFSEDGEYFAYGLSA  
 13786144 LYDYPKYSCHFK-----KGKRYFYFYNTGLQNQRVLYVQDSLEG-----EARVFLDPNILSDDGTVALRGYAFSEDGEYFAYGLSA  
 5107662 LYDYPKYSCHFK-----KGKRYFYFYNTGLQNQRVLYVQDSLEG-----EARVFLDPNILSDDGTVALRGYAFSEDGEYFAYGLSA  
 79382269 LIDHPRYDSPFR-----QGDKYFYFHNTGLQAQSVLYMQDNLDA-----EPEVLDPNILSDDGTVALNTFSVSEDAKYLAYGLSS  
 27066372 LYDYPKYSCHFK-----KGKRYFYFYNTGLQNQRVLYVQDSLEG-----EARVFLDPNILSDDGTVALRGYAFSEDGEYFAYGLSA  
 19347837 LIDHPRYDSPFR-----QGDKYFYFHNTGLQAQSVLYMQDNLDA-----EPEVLDPNILSDDGTVALNTFSVSEDAKYLAYGLSS  
 109072195 LYDYPKYSCHFK-----KGKRYFYFYNTGLQNQRVLYVQDSLEG-----DARVFLDPNILSDDGTVALRGYAFSEDGEYFAYGLSA  
 11691900 LYDYPKYSCHFK-----KGKRYFYFYNTGLQNQRVLYVQDSLEG-----EARVFLDPNILSDDGTVALRGYAFSEDGEYFAYGLSA  
 41349456 LYDYPKYSCHFK-----KGKRYFYFYNTGLQNQRVLYVQDSLEG-----EARVFLDPNILSDDGTVALRGYAFSEDGEYFAYGLSA  
 558596 LYDYPKYSCHFK-----KGKRYFYFYNTGLQNQRVLYVQDSLEG-----EARVFLDPNILSDDGTVALRGYAFSEDGEYFAYGLSA  
 53127346 LYDYPKYSCHFK-----KGKRYFHFYNTGLQNQRVLYVQDSLDA-----DAKVFLLDPNKLSDGTVALRGYAFSEDGEYFAYGLSS  
 904214 LYDYPKYSCHFK-----KGKRYFYFYNTGLQNQRVLYVQDSLEG-----EARVFLDPNILSDDGTVALRGYAFSEDGEYFAYGLSA  
 15217929 FIDYPRFDTPFK-----RGNYSFYFHNSGLQAQSVLHVQDDLES-----EAEILLDPNILSDDGTVALNTLSISEDAKYLAYGLSS  
 9558588 FIDYPRFDTPFK-----RGNYSFYFHNSGLQAQSVLHVQDDLES-----EAEILLDPNILSDDGTVALNTLSISEDAKYLAYGLSS  
 38345850 LFDHPRYRAPFK-----RAGSYFYLHNPGLQPHSALYVQHGLGGG-----EEDVLLDPNITFSDATVSLAMFGVSHDGEHLAYGTSA  
 91082735 LWNYPKFSTPYR-----HGTKYYQYRNTGLQNQSVIYVQKDLA-----SKAEIFLDPNITFSEDGTVALSGTAFSEDGQTFAYGLSS  
 54650756 LWNYPKYGCPMR-----YGNYYYYFMNTGLQNQSVMYQQKSLGDE-----SESKVFLDPNITLSEDGTIALTQKAFSEDGKYMAYGLSE  
 73973662 LYDYPKYSCHFK-----KGKRYFYFYNTGLQNQRVLYVQDSLGD-----EARVFLDPNILLSDDGTVALRGYAFSEDGEYFAYGLSA  
 73973660 LYDYPKYSCHFK-----KGKRYFYFYNTGLQNQRVLYVQDSLGD-----EARVFLDPNILLSDDGTVALRGYAFSEDGEYFAYGLSA  
 47222200 LYDYPKYSCHFK-----RGSRYFYFHNEGLQNQDVLVYVQDSLEA-----PASVFLDPNKLSEDGTVALKMCRLSECEYFAYGLSS  
 73973664 LYDYPKYSCHFK-----KGKRYFYFYNTGLQNQRVLYVQDSLGD-----EARVFLDPNILLSDDGTVALRGYAFSEDGEYFAYGLSA  
 55235507 RWNYPKYSCPFR-----HGKRYFFFMNTGLQNQDVLVYVQDKLD-----GEPKVFLLDPNITLSDGTIALVGSRFSDGKLYAYGLSQ  
 73973658 LYDYPKYSCHFK-----KGKRYFYFYNTGLQNQRVLYVQDSLGD-----EARVFLDPNILLSDDGTVALRGYAFSEDGEYFAYGLSA  
 71666762 SQDYPRTSNPSY-----INGHYYYHNSGLQNQSVLMRATSLTD-----TAPSIFFLDPNITMSSDGTALKATAWSEDESMLAYSLSD  
 49523575 TFDPRRTSNPSF-----RNGRYFYFHNTGLQNQSVLKRATSLTD-----SNPTTFLDPNILSNDGTALKATAWSEDESMLAYSLSD  
 71747962 TFDPRRTSNPSF-----RNGRYFYFHNTGLQNQSVLKRATSLTD-----SNPTTFLDPNILSNDGTALKATAWSEDESMLAYSLSD  
 33317309 SQDYPRTSNPSY-----INGHYYYHNSGLQNQSVLMRAMSLTD-----TAPSIFFLDPNISMSSDGTALKATAWSEDESMLAYSLSD  
 47224662 I-----T---R-----RGSRYFHFYNTGLQNQSVMYVQESLDA-----EPRVFLDPNITFSEDGTVALRGYAFSEDGEYFAYGLSA  
 15291259 LWNYPKYGCPMR-----YGNYYYYFMNTGLQNQSVMYQQKSLGDE-----SESKVFLDPNITLSEDGTIALTQKAFSEDGKYMAYGLSE  
 73973656 LYDYPKYSCHFK-----KGKRYFYFYNTGLQNQRVLYVQDSLGD-----EARVFLDPNILLSDDGTVALRGYAFSEDGEYFAYGLSA

Prim.cons.   LWDYEKYSCPFKEGKSLQ22KGKRYFYFKNDGLQNQSVLYVQDSLEGAE3GEEEARVFLDPNILSDDGTVALRGYAFSEDGEYLAYGLSA  
                   280          290          300          310          320          330          340          350          360

|           |                                                                                            |
|-----------|--------------------------------------------------------------------------------------------|
| 62738741  | GGSDWRTVVKFVGVADGKPLADELKWVKFSGLAWLG-NDALLYSRFAEPKEG-----QAFQALNYNQTVWLHRLGTPQSADQPVFA--T  |
| 87200538  | GGSDWRTLKVIDVASGQVLSDTVEHVKFSHIAWAG-NEAVVYSRFPAPKAG-----EAFQAVSSNQSVWLHKLGTPQSEDRLLHA--T   |
| 103487461 | GGTDWRIVRVKDVATGQDLPDEVVRWVKFSALDWAKDGSGFYYSRFPEPKEG-----EAFQSLNENHAVYFHRLGTPQSADVLIHA--T  |
| 87200537  | AGSDWRTLRVVEVSSGRVLDERVDWANDTEIAWVG-DEGFLYSRFPAPGQG-----EDARAPRFGKAVWFHRVGTAQDRDEQVFA--T   |
| 94496227  | AGSDWRTLRLIDVDSGRTLDDAVQVWVKFSQTAWDGRSEGFFYSRFAAPGPG-----ETFRSTNLGQSLYYHRIIGTSQGQDQLIYA--T |
| 35211243  | SGSDWQQWHVREVATGRDLPDVIKWKVKSSEASWLKDGKGFYYSRYDEPNAA-----TQFQDVNYFQKLYFHRLSTPQAQDVLVYE--R  |
| 32448009  | GGSDWRTWRVREVATGKDTDDLQWSKFSGIAWTPDGDGFYYSRYAEPAGE-----EELTGTNDNQMMYLHELGTQSEDKLVMK--R     |
| 75906687  | SGSDWQEWKVIDVETGADFPDHLNWWKFSGASWTNDNQGFYYSRYDEPNEK-----TKLEDVNYQKLYYHQLGTQSEDLIIYQ--R     |
| 35211187  | SGSDWQQWRVLDIETGEDLPDMVQVWVKFSGASWLKDGKGFYYSRYDEPNAA-----GQFQDVNYFQKLYFHRLGTPQDQDVLVYE--R  |
| 67921530  | SGSDWVEWKVREIETGKDLSDHLKWKTKFTGTSTWTKDNQGFYYSRYNQPKEK-----TKLEDINHYQKLYYHKLGTSDQEDVLIYE--R |
| 67930945  | AGSDWSDCRIRSVADGKDLPDVIRWTKFSNMAWATDDGFFYYSRYPEPPAG-----ELLTAAALNQKVYFHRLGDPQTADRLVYE--R   |
| 17131625  | SGSDWQEWKVVVDVETGADFPDHLNWKFSGASWTNDNQGFYYSRYDEPKEK-----TKLEDVNYQKLYYHRLGTPQSEDLIIYQ--R    |
| 86609965  | SGSDWQEWKVRDIETGEDLPDHLRWVKFSGASWTLDGQGFYYSRYDEPAPG-----SEYESVNYFQKLYYHRLGTSQSEDLVLVYH--R  |
| 83859556  | GGSDWRSIRVMDVETGETLSDEIEWVKFSPLSWAKDGSGFYYSRYPEPEEG-----EAFTALNLNQAIYFHELGTDQSEDDVQIMA--D  |
| 28808634  | GGSDWRKVIIVLDTETKKPVGETLVDIKFSGISWLG-NQGFYYSYDKP-KG-----SELSAKTDQHKLYFHKLGTKQSEDDQLIFGG-F  |
| 75854458  | GGSDWRKVIIVLDTETKKPVGETLVDIKFSGISWLG-NQGFYYSYDKP-QG-----SELSAKTDQHKLYFHKLGTKQSEDDQLIFGG-F  |
| 86607173  | SGSDWQEWKVRDIETGEDLPDHLRWIKFSGASWTLDGQGFYYSRYDEPAPG-----SEYESANYFQKLYYHRLGTPQSEDDLVIYH--R  |
| 23128197  | SGSDWEEWKVRDVETGEDLQDHLKWKIKFSGASWTHNQGFYYSRYDEPNEK-----TQLEDVNYQKLYYHQLGKQSEDLVIYH--R     |
| 91226380  | GGSDWRKVIIVLDTETKKPVGETLVDIKFSGISWLG-NQGFYYSYDKP-KG-----SELSAKTDQHKLYFHKLGTKQSEDDQLIFGG-V  |
| 88711708  | GGSDWRKAIVIDAKSKEIVEDTLVDIKFSGVSWKG-NEGFYYSYDKP-KG-----SELSAKTDQHKVYYHKLGTQKEDKVIFGA-K     |
| 110167745 | SGSDWQEWRIKNIDTGEHFDPVLQWIKFYIPTWKNDNQGLFYYSRYEQPKE-----GKLKDTNYLHKVYYHSLGTSQDNDVLIYE--K   |
| 109899092 | GGSDWRKAITIDVETMQPVSETLKDIKFSGISWLG-NEGFYYSYDKP-EG-----SELSAKTDQHKLYFHRLNDKQTDTLVFGG-T     |
| 86144168  | GGSDWRKVLVMDAETKEITEDTLVDIKFSGISWRE-NDGFYYSYDKP-DG-----SELSAKTDQHKVYYHKLNTAQKEDDLIFGG-T    |
| 4973227   | AGSDWREIHLMDVESKQPLETPLKDVKFSGISWLG-NEGFYYSYDKP-DG-----SELSARTDQHKVYFHRLGTAQEDDRLVFGA-I    |
| 6048357   | AGSDWREIHLMDVESKQPLETPLKDVKFSGISWLG-NEGFYYSYDKP-DG-----SELSARTDQHKVYFHRLGTAQEDDRLVFGA-I    |
| 76875127  | GGSDWRKIIIIIDTQTKEQVEQALVDVKFSGIDWLG-NEGFYYSYDKP-EG-----SELSAKTDQHKVYYHTLGSQATDKLVFGA-T    |
| 216201    | AGSDWREIHLMDVESKQPLETPLRDVKFSGISWLG-NEGFYYSYDKP-DG-----SELSARTDQHKLYFHRLGTAQEDDRLVFGA-I    |
| 88804657  | GGSDWRKVIIVMDAASREIIEDTLVDIKFSGVSWRG-NEGFYYSYDKP-EG-----SELSARTDQHKVYFHQLGQPQAGDQLIFGG-T   |
| 89517967  | GGSDWRKIIVLNTNDLTQVGDITKDVKFSGMSWKG-NDGFYYSYDKP-DG-----SELSAMTDQHKLYYHKLGTQKEDQVIFGG-T     |
| 90588230  | GGSDWRKVIIDALSCKVVEDTLVDVKFSGISWLG-NEGFYYSYDKP-KG-----SELSAKTDQHKLYFHKLGTQKEDKVIFG---      |
| 71143549  | GGSDWRKIIIDVETKKVLETPLEDVVKFSDISWFK-NEGFYYSYDKP-EG-----SELSAKTDQHKLYYHVLGQPQKEDKVIFGN-T    |
| 83855898  | GGSDWRKVIIVDAETLERVEDTLQDIKFSGVSWNV-NEGFYYSYDKP-KG-----SELSAKTDQHKLYYHKLGTQKEDKLIFGG-T     |
| 85710915  | GGSDWRKIIVIDAETKERLEDPLVDVKFSGISWKG-NEGFYYSYDKP-EG-----SELSAKTDQHKLYYHELGTQSDDELVFGG-T     |
| 78368715  | SGSDWQQWQFVDVATGAKLGDELNWKFSSEWSDKNKGVYYSRYDAPEGG-----NLLADVNFNQKVYYHQLGTDQSQDKLIYE--R     |
| 56178266  | GGSDWRKIRVIDAETKEQLEELVDVKFSGISWVG-NEGFYYSYDKP-EG-----SELSAKTDQHKLYYHELGTQSDDKLVFGG-T      |

91215481 GGS<sup>D</sup>W<sup>R</sup>K<sup>I</sup>I<sup>V</sup>L<sup>N</sup>T<sup>E</sup>T<sup>M</sup>D<sup>R</sup>K<sup>E</sup>D<sup>T</sup>L<sup>V</sup>D<sup>V</sup>K<sup>F</sup>S<sup>G</sup>V<sup>S</sup>W<sup>K</sup>G-NE<sup>G</sup>F<sup>F</sup>Y<sup>S</sup>S<sup>S</sup>Y<sup>D</sup>K<sup>P</sup>-EG-----SEL<sup>S</sup>A<sup>K</sup>T<sup>D</sup>Q<sup>H</sup>K<sup>L</sup>Y<sup>F</sup>H<sup>T</sup>M<sup>G</sup>T<sup>P</sup>Q<sup>S</sup>G<sup>D</sup>E<sup>V</sup>I<sup>F</sup>G<sup>A</sup>-T  
 78688320 S<sup>G</sup>S<sup>D</sup>W<sup>Q</sup>Q<sup>W</sup>Q<sup>F</sup>I<sup>D</sup>I<sup>A</sup>T<sup>G</sup>K<sup>K</sup>L<sup>K</sup>D<sup>E</sup>L<sup>N</sup>W<sup>I</sup>K<sup>F</sup>S<sup>S</sup>A<sup>V</sup>W<sup>D</sup>K<sup>E</sup>N<sup>Q</sup>G<sup>V</sup>F<sup>Y</sup>A<sup>R</sup>Y<sup>D</sup>A<sup>P</sup>A<sup>G</sup>G-----D<sup>L</sup>L<sup>A</sup>D<sup>V</sup>N<sup>F</sup>N<sup>Q</sup>K<sup>V</sup>Y<sup>Y</sup>H<sup>K</sup>L<sup>G</sup>T<sup>D</sup>Q<sup>R</sup>Q<sup>D</sup>L<sup>L</sup>I<sup>Y</sup>E--R  
 24374294 S<sup>G</sup>S<sup>D</sup>W<sup>Q</sup>Q<sup>W</sup>Q<sup>F</sup>I<sup>D</sup>I<sup>A</sup>T<sup>G</sup>K<sup>K</sup>L<sup>N</sup>D<sup>E</sup>L<sup>S</sup>W<sup>I</sup>K<sup>F</sup>S<sup>S</sup>A<sup>V</sup>W<sup>D</sup>K<sup>E</sup>N<sup>Q</sup>G<sup>V</sup>F<sup>Y</sup>A<sup>R</sup>Y<sup>D</sup>A<sup>P</sup>A<sup>G</sup>G-----D<sup>L</sup>L<sup>A</sup>D<sup>V</sup>N<sup>F</sup>N<sup>Q</sup>K<sup>V</sup>Y<sup>Y</sup>H<sup>K</sup>L<sup>G</sup>T<sup>D</sup>Q<sup>R</sup>Q<sup>D</sup>L<sup>L</sup>I<sup>Y</sup>E--R  
 456523 GGS<sup>D</sup>W<sup>N</sup>K<sup>I</sup>I<sup>I</sup>L<sup>D</sup>A<sup>E</sup>T<sup>K</sup>K<sup>Q</sup>L<sup>D</sup>E<sup>T</sup>L<sup>L</sup>D<sup>V</sup>K<sup>F</sup>S<sup>G</sup>I<sup>S</sup>W<sup>L</sup>G-DE<sup>G</sup>F<sup>F</sup>Y<sup>S</sup>S<sup>S</sup>Y<sup>D</sup>K<sup>P</sup>K<sup>E</sup>G-----S<sup>V</sup>L<sup>S</sup>G<sup>M</sup>T<sup>D</sup>K<sup>H</sup>K<sup>V</sup>Y<sup>F</sup>H<sup>K</sup>L<sup>G</sup>T<sup>K</sup>Q<sup>S</sup>Q<sup>D</sup>E<sup>L</sup>I<sup>I</sup>G<sup>G</sup>--  
 77816782 S<sup>G</sup>S<sup>D</sup>W<sup>Q</sup>Q<sup>W</sup>Q<sup>F</sup>I<sup>N</sup>V<sup>A</sup>T<sup>G</sup>K<sup>K</sup>L<sup>S</sup>D<sup>E</sup>L<sup>K</sup>W<sup>I</sup>K<sup>F</sup>S<sup>N</sup>A<sup>V</sup>W<sup>D</sup>K<sup>E</sup>N<sup>Q</sup>G<sup>V</sup>F<sup>Y</sup>A<sup>R</sup>Y<sup>D</sup>A<sup>P</sup>A<sup>G</sup>G-----D<sup>L</sup>L<sup>A</sup>D<sup>V</sup>N<sup>F</sup>N<sup>Q</sup>K<sup>V</sup>Y<sup>Y</sup>H<sup>T</sup>L<sup>G</sup>T<sup>D</sup>Q<sup>R</sup>Q<sup>D</sup>L<sup>L</sup>I<sup>Y</sup>E--R  
 68547790 S<sup>G</sup>S<sup>D</sup>W<sup>Q</sup>E<sup>W</sup>A<sup>F</sup>I<sup>D</sup>V<sup>A</sup>T<sup>G</sup>R<sup>K</sup>L<sup>A</sup>D<sup>S</sup>L<sup>N</sup>W<sup>I</sup>K<sup>F</sup>S<sup>R</sup>A<sup>E</sup>W<sup>A</sup>H<sup>D</sup>N<sup>S</sup>G<sup>V</sup>Y<sup>Y</sup>S<sup>R</sup>Y<sup>D</sup>A<sup>P</sup>A<sup>G</sup>G-----D<sup>I</sup>L<sup>V</sup>D<sup>V</sup>N<sup>Y</sup>N<sup>Q</sup>K<sup>V</sup>Y<sup>F</sup>H<sup>R</sup>I<sup>G</sup>D<sup>E</sup>Q<sup>A</sup>K<sup>D</sup>T<sup>L</sup>V<sup>Y</sup>E--R  
 82744257 S<sup>G</sup>S<sup>D</sup>W<sup>Q</sup>Q<sup>W</sup>Q<sup>F</sup>I<sup>N</sup>V<sup>A</sup>T<sup>G</sup>K<sup>K</sup>L<sup>S</sup>D<sup>E</sup>L<sup>K</sup>W<sup>I</sup>K<sup>F</sup>S<sup>N</sup>A<sup>V</sup>W<sup>D</sup>K<sup>E</sup>N<sup>Q</sup>G<sup>V</sup>F<sup>Y</sup>A<sup>R</sup>Y<sup>D</sup>A<sup>P</sup>A<sup>G</sup>G-----D<sup>L</sup>L<sup>A</sup>D<sup>V</sup>N<sup>F</sup>N<sup>Q</sup>K<sup>V</sup>Y<sup>Y</sup>H<sup>T</sup>L<sup>G</sup>T<sup>D</sup>Q<sup>R</sup>Q<sup>D</sup>L<sup>L</sup>I<sup>Y</sup>E--R  
 86131249 GGS<sup>D</sup>W<sup>R</sup>K<sup>I</sup>L<sup>V</sup>M<sup>D</sup>T<sup>E</sup>K<sup>K</sup>E<sup>I</sup>V<sup>E</sup>D<sup>T</sup>L<sup>V</sup>D<sup>V</sup>K<sup>F</sup>S<sup>G</sup>M<sup>S</sup>W<sup>Y</sup>K-NE<sup>G</sup>F<sup>F</sup>Y<sup>S</sup>S<sup>S</sup>Y<sup>D</sup>K<sup>P</sup>-K<sup>G</sup>-----SEL<sup>S</sup>A<sup>K</sup>T<sup>D</sup>Q<sup>H</sup>K<sup>L</sup>Y<sup>Y</sup>H<sup>K</sup>L<sup>G</sup>T<sup>A</sup>Q<sup>S</sup>T<sup>D</sup>K<sup>L</sup>I<sup>F</sup>G<sup>G</sup>-T  
 88796133 G<sup>G</sup>T<sup>D</sup>W<sup>K</sup>T<sup>I</sup>H<sup>I</sup>R<sup>E</sup>T<sup>S</sup>N<sup>K</sup>S<sup>D</sup>L<sup>T</sup>D<sup>V</sup>I<sup>K</sup>G<sup>V</sup>K<sup>F</sup>S<sup>N</sup>V<sup>A</sup>W<sup>L</sup>P<sup>D</sup>E<sup>S</sup>G<sup>F</sup>F<sup>Y</sup>S<sup>R</sup>Y<sup>P</sup>E<sup>N</sup>D<sup>A</sup>G-----E<sup>F</sup>D<sup>D</sup>S<sup>Q</sup>T<sup>V</sup>S--I<sup>Y</sup>F<sup>H</sup>A<sup>I</sup>G<sup>T</sup>A<sup>Q</sup>N<sup>E</sup>D<sup>T</sup>K<sup>V</sup>F<sup>S</sup>--F  
 42526704 S<sup>G</sup>S<sup>D</sup>W<sup>E</sup>E<sup>I</sup>F<sup>V</sup>F<sup>D</sup>A<sup>E</sup>K<sup>K</sup>A<sup>D</sup>T<sup>G</sup>E<sup>H</sup>I<sup>H</sup>W<sup>V</sup>K<sup>F</sup>S<sup>N</sup>I<sup>A</sup>W<sup>Y</sup>--K<sup>D</sup>G<sup>F</sup>F<sup>Y</sup>S<sup>S</sup>Y<sup>D</sup>T<sup>P</sup>D<sup>K</sup>G-----K<sup>S</sup>L<sup>T</sup>E<sup>K</sup>N<sup>E</sup>F<sup>Q</sup>K<sup>L</sup>K<sup>Y</sup>H<sup>K</sup>L<sup>G</sup>T<sup>K</sup>E<sup>S</sup>D<sup>L</sup>L<sup>I</sup>F<sup>E</sup>D--  
 27367204 GGS<sup>D</sup>W<sup>R</sup>K<sup>I</sup>F<sup>V</sup>L<sup>N</sup>A<sup>E</sup>T<sup>G</sup>E<sup>Q</sup>I<sup>E</sup>P<sup>E</sup>I<sup>V</sup>D<sup>A</sup>K<sup>F</sup>T<sup>G</sup>V<sup>S</sup>W<sup>L</sup>G-NQ<sup>G</sup>F<sup>F</sup>Y<sup>S</sup>S<sup>R</sup>Y<sup>D</sup>K<sup>P</sup>-Q<sup>G</sup>-----SEL<sup>S</sup>A<sup>R</sup>T<sup>E</sup>Q<sup>H</sup>K<sup>L</sup>Y<sup>Y</sup>H<sup>Q</sup>L<sup>G</sup>T<sup>P</sup>Q<sup>S</sup>D<sup>D</sup>V<sup>L</sup>V<sup>F</sup>G<sup>E</sup>-A  
 37676919 GGS<sup>D</sup>W<sup>R</sup>K<sup>I</sup>F<sup>V</sup>I<sup>D</sup>A<sup>E</sup>T<sup>G</sup>E<sup>Q</sup>I<sup>E</sup>P<sup>E</sup>I<sup>V</sup>D<sup>A</sup>K<sup>F</sup>T<sup>G</sup>V<sup>S</sup>W<sup>L</sup>G-NQ<sup>G</sup>F<sup>F</sup>Y<sup>S</sup>S<sup>R</sup>Y<sup>D</sup>K<sup>P</sup>-Q<sup>G</sup>-----SEL<sup>S</sup>A<sup>R</sup>T<sup>E</sup>Q<sup>H</sup>K<sup>L</sup>Y<sup>Y</sup>H<sup>Q</sup>L<sup>G</sup>T<sup>P</sup>Q<sup>S</sup>D<sup>D</sup>V<sup>L</sup>V<sup>F</sup>G<sup>E</sup>-A  
 7585979 GGS<sup>D</sup>W<sup>R</sup>K<sup>I</sup>F<sup>V</sup>I<sup>D</sup>A<sup>E</sup>T<sup>K</sup>E<sup>Q</sup>L<sup>E</sup>P<sup>E</sup>I<sup>V</sup>D<sup>A</sup>K<sup>F</sup>T<sup>S</sup>I<sup>S</sup>W<sup>L</sup>G-SK<sup>G</sup>F<sup>F</sup>Y<sup>S</sup>S<sup>S</sup>Y<sup>D</sup>K<sup>P</sup>-Q<sup>G</sup>-----SEL<sup>S</sup>A<sup>R</sup>T<sup>E</sup>H<sup>H</sup>K<sup>L</sup>Y<sup>Y</sup>H<sup>E</sup>L<sup>G</sup>T<sup>P</sup>Q<sup>S</sup>E<sup>D</sup>K<sup>V</sup>I<sup>F</sup>G<sup>E</sup>-L  
 28809898 GGS<sup>D</sup>W<sup>R</sup>K<sup>I</sup>F<sup>V</sup>I<sup>D</sup>T<sup>E</sup>T<sup>K</sup>E<sup>Q</sup>L<sup>E</sup>P<sup>E</sup>I<sup>V</sup>D<sup>A</sup>K<sup>F</sup>T<sup>S</sup>I<sup>S</sup>W<sup>L</sup>G-SK<sup>G</sup>F<sup>F</sup>Y<sup>S</sup>S<sup>S</sup>Y<sup>D</sup>K<sup>P</sup>-Q<sup>G</sup>-----SEL<sup>S</sup>A<sup>R</sup>T<sup>E</sup>H<sup>H</sup>K<sup>L</sup>Y<sup>Y</sup>H<sup>E</sup>L<sup>G</sup>T<sup>P</sup>Q<sup>S</sup>E<sup>D</sup>K<sup>V</sup>I<sup>F</sup>G<sup>E</sup>-L  
 6460324 GGS<sup>D</sup>W<sup>L</sup>T<sup>W</sup>Q<sup>V</sup>R<sup>D</sup>V<sup>A</sup>S<sup>G</sup>E<sup>D</sup>T<sup>G</sup>E<sup>P</sup>L<sup>R</sup>W<sup>S</sup>K<sup>F</sup>S<sup>G</sup>A<sup>A</sup>W<sup>L</sup>P<sup>D</sup>G<sup>S</sup>G<sup>F</sup>F<sup>Y</sup>S<sup>A</sup>Y<sup>D</sup>A<sup>P</sup>G<sup>E</sup>G-----E<sup>A</sup>L<sup>T</sup>G<sup>A</sup>N<sup>K</sup>N<sup>Q</sup>R<sup>L</sup>M<sup>F</sup>H<sup>R</sup>L<sup>G</sup>T<sup>P</sup>Q<sup>D</sup>A<sup>D</sup>E<sup>L</sup>V<sup>L</sup>E--R  
 91223249 GGS<sup>D</sup>W<sup>R</sup>K<sup>I</sup>F<sup>V</sup>I<sup>D</sup>T<sup>E</sup>T<sup>K</sup>E<sup>Q</sup>L<sup>E</sup>P<sup>E</sup>I<sup>V</sup>D<sup>A</sup>K<sup>F</sup>T<sup>S</sup>I<sup>S</sup>W<sup>L</sup>G-SK<sup>G</sup>F<sup>F</sup>Y<sup>S</sup>S<sup>S</sup>Y<sup>D</sup>K<sup>P</sup>-Q<sup>G</sup>-----SEL<sup>S</sup>A<sup>R</sup>T<sup>E</sup>H<sup>H</sup>K<sup>L</sup>Y<sup>Y</sup>H<sup>E</sup>L<sup>G</sup>T<sup>P</sup>Q<sup>S</sup>E<sup>D</sup>K<sup>V</sup>I<sup>F</sup>G<sup>E</sup>-L  
 56180108 GGS<sup>D</sup>W<sup>T</sup>E<sup>I</sup>K<sup>V</sup>R<sup>N</sup>V<sup>E</sup>S<sup>G</sup>K<sup>D</sup>T<sup>R</sup>D<sup>V</sup>I<sup>E</sup>G<sup>V</sup>K<sup>F</sup>T<sup>E</sup>V<sup>A</sup>W<sup>L</sup>P<sup>N</sup>E<sup>R</sup>G<sup>F</sup>F<sup>Y</sup>S<sup>R</sup>Y<sup>P</sup>E<sup>N</sup>K<sup>D</sup>G-----S<sup>F</sup>D<sup>D</sup>T<sup>K</sup>P<sup>V</sup>S--V<sup>Y</sup>F<sup>H</sup>K<sup>L</sup>G<sup>T</sup>E<sup>Q</sup>S<sup>D</sup>E<sup>L</sup>I<sup>F</sup>A--F  
 55769741 S<sup>G</sup>S<sup>D</sup>W<sup>V</sup>T<sup>I</sup>R<sup>V</sup>M<sup>N</sup>I<sup>A</sup>D<sup>K</sup>Q<sup>T</sup>L<sup>S</sup>D<sup>K</sup>L<sup>S</sup>W<sup>V</sup>K<sup>F</sup>S<sup>S</sup>I<sup>S</sup>W<sup>T</sup>H<sup>D</sup>G<sup>K</sup>G<sup>F</sup>F<sup>Y</sup>G<sup>R</sup>Y<sup>P</sup>A<sup>P</sup>R<sup>E</sup>V<sup>E</sup>---L<sup>D</sup>A<sup>G</sup>T<sup>E</sup>T<sup>N</sup>I<sup>N</sup>L<sup>N</sup>H<sup>E</sup>I<sup>Y</sup>Y<sup>H</sup>V<sup>V</sup>G<sup>S</sup>D<sup>Q</sup>S<sup>E</sup>D<sup>I</sup>L<sup>C</sup>W<sup>K</sup>D<sup>P</sup>-  
 47507507 S<sup>G</sup>S<sup>D</sup>W<sup>V</sup>T<sup>I</sup>K<sup>F</sup>M<sup>K</sup>V<sup>A</sup>N<sup>Q</sup>E<sup>E</sup>L<sup>P</sup>D<sup>V</sup>L<sup>E</sup>R<sup>V</sup>K<sup>F</sup>S<sup>C</sup>M<sup>S</sup>W<sup>T</sup>H<sup>D</sup>G<sup>V</sup>G<sup>M</sup>F<sup>Y</sup>N<sup>C</sup>Y<sup>P</sup>K<sup>Q</sup>V<sup>G</sup>K-----S<sup>D</sup>G<sup>T</sup>E<sup>T</sup>S<sup>A</sup>N<sup>L</sup>N<sup>Q</sup>K<sup>L</sup>F<sup>Y</sup>H<sup>V</sup>L<sup>G</sup>T<sup>S</sup>Q<sup>S</sup>D<sup>D</sup>V<sup>L</sup>C<sup>A</sup>E<sup>F</sup>P-  
 28502989 S<sup>G</sup>S<sup>D</sup>W<sup>V</sup>T<sup>I</sup>K<sup>F</sup>M<sup>K</sup>V<sup>A</sup>N<sup>Q</sup>E<sup>E</sup>L<sup>P</sup>D<sup>V</sup>L<sup>E</sup>R<sup>V</sup>K<sup>F</sup>S<sup>C</sup>M<sup>S</sup>W<sup>T</sup>H<sup>D</sup>G<sup>V</sup>G<sup>M</sup>F<sup>Y</sup>N<sup>C</sup>Y<sup>P</sup>K<sup>Q</sup>V<sup>G</sup>K-----S<sup>D</sup>G<sup>T</sup>E<sup>T</sup>S<sup>A</sup>N<sup>L</sup>N<sup>Q</sup>K<sup>L</sup>F<sup>Y</sup>H<sup>V</sup>L<sup>G</sup>T<sup>S</sup>Q<sup>S</sup>D<sup>D</sup>V<sup>L</sup>C<sup>A</sup>E<sup>F</sup>P-  
 86144914 GGS<sup>D</sup>W<sup>R</sup>K<sup>I</sup>F<sup>V</sup>I<sup>D</sup>T<sup>E</sup>T<sup>K</sup>Q<sup>L</sup>E<sup>A</sup>E<sup>I</sup>T<sup>D</sup>A<sup>K</sup>F<sup>T</sup>G<sup>I</sup>S<sup>W</sup>L<sup>G</sup>-N<sup>R</sup>G<sup>F</sup>F<sup>Y</sup>S<sup>S</sup>Y<sup>D</sup>K<sup>P</sup>-D<sup>G</sup>-----S<sup>Q</sup>L<sup>S</sup>A<sup>R</sup>T<sup>E</sup>Q<sup>H</sup>K<sup>L</sup>Y<sup>F</sup>H<sup>E</sup>L<sup>G</sup>T<sup>E</sup>Q<sup>A</sup>N<sup>D</sup>K<sup>V</sup>I<sup>F</sup>G<sup>E</sup>-N  
 84386759 GGS<sup>D</sup>W<sup>R</sup>K<sup>I</sup>F<sup>V</sup>I<sup>D</sup>T<sup>E</sup>T<sup>K</sup>Q<sup>L</sup>E<sup>A</sup>E<sup>I</sup>T<sup>D</sup>A<sup>K</sup>F<sup>T</sup>G<sup>I</sup>S<sup>W</sup>L<sup>G</sup>-N<sup>R</sup>G<sup>F</sup>F<sup>Y</sup>S<sup>S</sup>Y<sup>D</sup>K<sup>P</sup>-D<sup>G</sup>-----S<sup>Q</sup>L<sup>S</sup>A<sup>R</sup>T<sup>E</sup>Q<sup>H</sup>K<sup>L</sup>Y<sup>F</sup>H<sup>E</sup>L<sup>G</sup>T<sup>E</sup>Q<sup>A</sup>S<sup>D</sup>K<sup>V</sup>V<sup>F</sup>G<sup>E</sup>-N  
 63100723 S<sup>G</sup>S<sup>D</sup>W<sup>V</sup>E<sup>I</sup>R<sup>F</sup>L<sup>R</sup>V<sup>D</sup>G<sup>A</sup>V<sup>L</sup>L<sup>E</sup>D<sup>R</sup>L<sup>E</sup>R<sup>V</sup>K<sup>F</sup>T<sup>C</sup>M<sup>S</sup>W<sup>T</sup>H<sup>D</sup>G<sup>K</sup>G<sup>L</sup>F<sup>Y</sup>N<sup>S</sup>Y<sup>P</sup>E<sup>Q</sup>E<sup>G</sup>K-----S<sup>D</sup>G<sup>T</sup>E<sup>T</sup>S<sup>T</sup>N<sup>L</sup>H<sup>Q</sup>K<sup>L</sup>Y<sup>Y</sup>H<sup>V</sup>L<sup>G</sup>T<sup>P</sup>Q<sup>S</sup>Q<sup>D</sup>V<sup>L</sup>C<sup>A</sup>E<sup>F</sup>P-  
 38649021 S<sup>G</sup>S<sup>D</sup>W<sup>V</sup>T<sup>I</sup>K<sup>F</sup>M<sup>K</sup>V<sup>A</sup>N<sup>Q</sup>E<sup>E</sup>L<sup>P</sup>D<sup>V</sup>L<sup>E</sup>R<sup>V</sup>K<sup>F</sup>S<sup>C</sup>M<sup>S</sup>W<sup>T</sup>H<sup>D</sup>G<sup>V</sup>G<sup>I</sup>F<sup>Y</sup>N<sup>C</sup>Y<sup>P</sup>Q<sup>Q</sup>K<sup>G</sup>K-----S<sup>D</sup>G<sup>T</sup>E<sup>T</sup>S<sup>T</sup>N<sup>L</sup>N<sup>Q</sup>K<sup>L</sup>F<sup>Y</sup>H<sup>V</sup>L<sup>G</sup>T<sup>S</sup>Q<sup>S</sup>D<sup>D</sup>V<sup>L</sup>C<sup>A</sup>E<sup>F</sup>P-  
 59711729 A<sup>G</sup>S<sup>D</sup>W<sup>R</sup>K<sup>I</sup>I<sup>V</sup>L<sup>D</sup>A<sup>E</sup>T<sup>K</sup>E<sup>Q</sup>I<sup>E</sup>A<sup>P</sup>I<sup>V</sup>D<sup>A</sup>K<sup>F</sup>T<sup>G</sup>I<sup>S</sup>W<sup>L</sup>G-SK<sup>G</sup>F<sup>F</sup>Y<sup>S</sup>S<sup>S</sup>Y<sup>D</sup>K<sup>P</sup>-E<sup>G</sup>-----SEL<sup>S</sup>A<sup>R</sup>T<sup>E</sup>Q<sup>H</sup>K<sup>L</sup>Y<sup>F</sup>H<sup>E</sup>I<sup>G</sup>K<sup>P</sup>Q<sup>A</sup>D<sup>D</sup>V<sup>L</sup>V<sup>F</sup>G<sup>G</sup>-S  
 6755152 S<sup>G</sup>S<sup>D</sup>W<sup>V</sup>T<sup>I</sup>K<sup>F</sup>M<sup>K</sup>V<sup>D</sup>G<sup>A</sup>K<sup>E</sup>L<sup>P</sup>D<sup>V</sup>L<sup>E</sup>R<sup>V</sup>K<sup>F</sup>T<sup>C</sup>M<sup>A</sup>W<sup>T</sup>H<sup>D</sup>G<sup>K</sup>G<sup>M</sup>F<sup>Y</sup>N<sup>S</sup>Y<sup>P</sup>Q<sup>Q</sup>D<sup>G</sup>K-----S<sup>D</sup>G<sup>T</sup>E<sup>T</sup>S<sup>T</sup>N<sup>L</sup>H<sup>Q</sup>K<sup>L</sup>C<sup>Y</sup>H<sup>V</sup>L<sup>G</sup>T<sup>D</sup>Q<sup>S</sup>E<sup>D</sup>I<sup>L</sup>C<sup>A</sup>E<sup>F</sup>P-  
 74215349 S<sup>G</sup>S<sup>D</sup>W<sup>V</sup>T<sup>I</sup>K<sup>F</sup>M<sup>K</sup>V<sup>D</sup>G<sup>A</sup>K<sup>E</sup>L<sup>P</sup>D<sup>V</sup>L<sup>E</sup>R<sup>V</sup>K<sup>F</sup>T<sup>C</sup>M<sup>A</sup>W<sup>T</sup>H<sup>D</sup>G<sup>K</sup>G<sup>M</sup>F<sup>Y</sup>N<sup>S</sup>Y<sup>P</sup>Q<sup>Q</sup>D<sup>G</sup>K-----S<sup>D</sup>G<sup>T</sup>E<sup>T</sup>S<sup>T</sup>N<sup>L</sup>H<sup>Q</sup>K<sup>L</sup>C<sup>Y</sup>H<sup>V</sup>L<sup>G</sup>T<sup>D</sup>Q<sup>S</sup>E<sup>D</sup>I<sup>L</sup>C<sup>A</sup>E<sup>F</sup>P-  
 50514023 S<sup>G</sup>S<sup>D</sup>W<sup>V</sup>T<sup>I</sup>K<sup>F</sup>M<sup>K</sup>V<sup>D</sup>G<sup>A</sup>K<sup>E</sup>L<sup>P</sup>D<sup>V</sup>L<sup>E</sup>R<sup>V</sup>K<sup>F</sup>S<sup>C</sup>M<sup>A</sup>W<sup>T</sup>H<sup>D</sup>G<sup>K</sup>G<sup>M</sup>F<sup>Y</sup>N<sup>A</sup>Y<sup>P</sup>Q<sup>Q</sup>D<sup>G</sup>K-----S<sup>D</sup>G<sup>T</sup>E<sup>T</sup>S<sup>T</sup>N<sup>L</sup>H<sup>Q</sup>K<sup>L</sup>Y<sup>Y</sup>H<sup>V</sup>L<sup>G</sup>T<sup>D</sup>Q<sup>S</sup>E<sup>D</sup>I<sup>L</sup>C<sup>A</sup>E<sup>F</sup>P-  
 26345256 S<sup>G</sup>S<sup>D</sup>W<sup>V</sup>T<sup>I</sup>K<sup>F</sup>M<sup>K</sup>V<sup>D</sup>G<sup>A</sup>K<sup>E</sup>L<sup>P</sup>D<sup>V</sup>L<sup>E</sup>R<sup>V</sup>K<sup>F</sup>T<sup>C</sup>M<sup>A</sup>W<sup>T</sup>H<sup>D</sup>G<sup>K</sup>G<sup>M</sup>F<sup>Y</sup>N<sup>S</sup>Y<sup>P</sup>Q<sup>Q</sup>D<sup>G</sup>K-----S<sup>D</sup>G<sup>T</sup>E<sup>T</sup>S<sup>T</sup>N<sup>L</sup>H<sup>Q</sup>K<sup>L</sup>C<sup>Y</sup>H<sup>V</sup>L<sup>G</sup>T<sup>D</sup>Q<sup>S</sup>E<sup>D</sup>I<sup>L</sup>C<sup>A</sup>E<sup>F</sup>P-  
 157879458 S<sup>G</sup>S<sup>D</sup>W<sup>V</sup>T<sup>I</sup>K<sup>F</sup>M<sup>K</sup>V<sup>D</sup>G<sup>A</sup>K<sup>E</sup>L<sup>P</sup>D<sup>V</sup>L<sup>E</sup>R<sup>V</sup>K<sup>F</sup>S<sup>C</sup>M<sup>A</sup>W<sup>T</sup>H<sup>D</sup>G<sup>K</sup>G<sup>M</sup>F<sup>Y</sup>N<sup>A</sup>Y<sup>P</sup>Q<sup>Q</sup>D<sup>G</sup>K-----S<sup>D</sup>G<sup>T</sup>E<sup>T</sup>S<sup>T</sup>N<sup>L</sup>H<sup>Q</sup>K<sup>L</sup>Y<sup>Y</sup>H<sup>V</sup>L<sup>G</sup>T<sup>D</sup>Q<sup>S</sup>E<sup>D</sup>I<sup>L</sup>C<sup>V</sup>E<sup>F</sup>P-  
 51592147 S<sup>G</sup>S<sup>D</sup>W<sup>V</sup>T<sup>I</sup>K<sup>F</sup>M<sup>K</sup>V<sup>D</sup>G<sup>A</sup>K<sup>E</sup>L<sup>P</sup>D<sup>V</sup>L<sup>E</sup>R<sup>V</sup>K<sup>F</sup>S<sup>C</sup>M<sup>A</sup>W<sup>T</sup>H<sup>D</sup>G<sup>K</sup>G<sup>M</sup>F<sup>Y</sup>N<sup>A</sup>Y<sup>P</sup>Q<sup>Q</sup>D<sup>G</sup>K-----S<sup>D</sup>G<sup>T</sup>E<sup>T</sup>S<sup>T</sup>N<sup>L</sup>H<sup>Q</sup>K<sup>L</sup>Y<sup>Y</sup>H<sup>V</sup>L<sup>G</sup>T<sup>D</sup>Q<sup>S</sup>E<sup>D</sup>I<sup>L</sup>C<sup>A</sup>E<sup>F</sup>P-  
 10835490 S<sup>G</sup>S<sup>D</sup>W<sup>V</sup>T<sup>I</sup>K<sup>F</sup>M<sup>K</sup>V<sup>D</sup>G<sup>A</sup>K<sup>E</sup>L<sup>P</sup>D<sup>V</sup>L<sup>E</sup>R<sup>V</sup>K<sup>F</sup>S<sup>C</sup>M<sup>A</sup>W<sup>T</sup>H<sup>D</sup>G<sup>K</sup>G<sup>M</sup>F<sup>Y</sup>N<sup>A</sup>Y<sup>P</sup>Q<sup>Q</sup>D<sup>G</sup>K-----S<sup>D</sup>G<sup>T</sup>E<sup>T</sup>S<sup>T</sup>N<sup>L</sup>H<sup>Q</sup>K<sup>L</sup>Y<sup>Y</sup>H<sup>V</sup>L<sup>G</sup>T<sup>D</sup>Q<sup>S</sup>E<sup>D</sup>I<sup>L</sup>C<sup>A</sup>E<sup>F</sup>P-  
 50514022 S<sup>G</sup>S<sup>D</sup>W<sup>V</sup>T<sup>I</sup>K<sup>F</sup>M<sup>K</sup>V<sup>D</sup>G<sup>A</sup>K<sup>E</sup>L<sup>P</sup>D<sup>V</sup>L<sup>E</sup>R<sup>V</sup>K<sup>F</sup>S<sup>C</sup>M<sup>A</sup>W<sup>T</sup>H<sup>D</sup>G<sup>K</sup>G<sup>M</sup>F<sup>Y</sup>N<sup>A</sup>Y<sup>P</sup>Q<sup>Q</sup>D<sup>G</sup>K-----S<sup>D</sup>G<sup>T</sup>E<sup>T</sup>S<sup>T</sup>N<sup>L</sup>H<sup>Q</sup>K<sup>L</sup>Y<sup>Y</sup>H<sup>V</sup>L<sup>G</sup>T<sup>D</sup>Q<sup>S</sup>E<sup>D</sup>I<sup>L</sup>C<sup>A</sup>E<sup>F</sup>P-  
 37928243 S<sup>G</sup>S<sup>D</sup>W<sup>V</sup>T<sup>I</sup>K<sup>F</sup>M<sup>K</sup>V<sup>D</sup>G<sup>A</sup>K<sup>E</sup>L<sup>P</sup>D<sup>V</sup>L<sup>E</sup>R<sup>V</sup>K<sup>F</sup>S<sup>C</sup>M<sup>A</sup>W<sup>T</sup>H<sup>D</sup>G<sup>K</sup>G<sup>M</sup>F<sup>Y</sup>N<sup>A</sup>Y<sup>P</sup>Q<sup>Q</sup>D<sup>G</sup>K-----S<sup>D</sup>G<sup>T</sup>E<sup>T</sup>S<sup>T</sup>N<sup>L</sup>H<sup>Q</sup>K<sup>L</sup>Y<sup>Y</sup>H<sup>V</sup>L<sup>G</sup>T<sup>D</sup>Q<sup>S</sup>E<sup>D</sup>I<sup>L</sup>C<sup>A</sup>E<sup>F</sup>P-  
 27065055 S<sup>G</sup>S<sup>D</sup>W<sup>V</sup>T<sup>I</sup>K<sup>F</sup>M<sup>K</sup>V<sup>D</sup>G<sup>A</sup>K<sup>E</sup>L<sup>P</sup>D<sup>V</sup>L<sup>E</sup>R<sup>V</sup>K<sup>F</sup>S<sup>C</sup>M<sup>A</sup>W<sup>T</sup>H<sup>D</sup>G<sup>K</sup>G<sup>M</sup>F<sup>Y</sup>N<sup>A</sup>Y<sup>P</sup>Q<sup>Q</sup>D<sup>G</sup>K-----S<sup>D</sup>G<sup>T</sup>E<sup>T</sup>S<sup>T</sup>N<sup>L</sup>H<sup>Q</sup>K<sup>L</sup>Y<sup>Y</sup>H<sup>V</sup>L<sup>G</sup>T<sup>D</sup>Q<sup>S</sup>E<sup>D</sup>I<sup>L</sup>C<sup>A</sup>E<sup>F</sup>P-  
 5103285 S<sup>G</sup>S<sup>D</sup>W<sup>V</sup>T<sup>I</sup>K<sup>F</sup>M<sup>K</sup>V<sup>D</sup>G<sup>A</sup>K<sup>E</sup>L<sup>A</sup>D<sup>V</sup>L<sup>E</sup>R<sup>V</sup>K<sup>F</sup>S<sup>C</sup>M<sup>A</sup>W<sup>T</sup>H<sup>D</sup>G<sup>K</sup>G<sup>M</sup>F<sup>Y</sup>N<sup>A</sup>Y<sup>P</sup>Q<sup>Q</sup>D<sup>G</sup>K-----S<sup>D</sup>G<sup>T</sup>E<sup>T</sup>S<sup>T</sup>N<sup>L</sup>H<sup>Q</sup>K<sup>L</sup>C<sup>Y</sup>H<sup>V</sup>L<sup>G</sup>T<sup>D</sup>Q<sup>S</sup>E<sup>D</sup>I<sup>L</sup>C<sup>A</sup>E<sup>F</sup>P-

13786144 SGSDWVTIKFMKVDGAKELPDVLERVKFTCMAWTHDGGKGMFYNSYPQQDGK-----SDGTETSTNLHQKLCYHVLGTDQSEDLCAEFP-  
 5107662 SGSDWVTIKFMKVDGAKELPDVLERVKFSXMAWTHDGGKGMFYNAYPQQDGK-----SDGTETSTNLHQKLYYHVLGTDQSEDLCAEFP-  
 79382269 SGSDWVTIKLMKIEDKKVEPDTLSWVKFTGITWTHDSKGGFYGRYPAPKEGED--IDAGTETNSNLYHELYYHFLGTDQSQDILCWRDN-  
 27066372 SGSDWVTIKFMKVDGAKELPDVLERVKFSCMAWTHDGGKGMFYNAYPQQDGK-----SDGTETSTNLHQKLYYHVLGTDQSEDLCAEFP-  
 19347837 SGSDWVTIKLMKIEDKKVEPDTLSWVKFTGITWTHDSKGGFYGRYPAPKEGED--IDAGTETNSNLYHELYYHFLGTDQSQDILCWRDN-  
 109072195 SGSDWVTIKFMKVDGAKELPDVLERVKFSCMAWTHDGGKGMFYNSYPQQDGK-----SDGTETSTNLHQKLYYHVLGTDQSEDLCAEFP-  
 11691900 SGSDWVTIKFMKVDGAKELPDVLERVKFSCMAWTHDGGKGMFYNSYPQQDGK-----SDGTETSTNLHQKLYYHVLGTDQSEDLCAEFP-  
 41349456 SGSDWVTIKFMKVDGAKELPDVLERVKFSCMAWTHDGGKGMFYNSYPQQDGK-----SDGTETSTNLHQKLYYHVLGTDQSEDLCAEFP-  
 558596 SGSDWVTIKFMKVDGAKELPDVLERVKFSCMAWTHDGGKGMFYNSYPQQDGK-----SDGTETSTNLHQKLYYHVLGTDQSEDLCAEFP-  
 53127346 SGSDWVTIKFMKVEGAEELPDTLERVKFSCMAWTHDGGKGMFYNCYPKQDGK-----SDGTETSTNLHQKLYYHVLGTDQSEDLCAEFP-  
 904214 SGSDWVTIKFMKVDGAKELPDVLERVKFSCMAWTHDGGKGMFYNSYPQQDGK-----SDGTETSTNLHQKLYYHVLGTDQSEDLCAEFP-  
 15217929 SGSDWVTIKVMKIEDKKVEPDSLWVKFSGITWTHDGGKGGFYSRYPAPREGEK--IDAGTETNSNLYHELYYHFLGTDQSEDLCAEFP-  
 9558588 SGSDWVTIKVMKIEDKKVEPDSLWVKFSGITWTHDGGKGGFYSRYPAPREGEK--IDAGTETNSNLYHELYYHFLGTDQSEDLCAEFP-  
 38345850 SGSDWVTIRVMRVRDRRHLHDEICWVKFSAIAWTRDGGKGGFYSRFPAPKNDGAP-LGAGIKTSVNLNHEVYYHFLGTDQSEDLCAEFP-  
 91082735 SGSDWLEIKFKDVETGKDYKEILKKVKFSPMTWMHDNKGFFYGAYLDQGTGK-----ADGSETKTNENQKLYYHELGTQSQDVVVVEF--  
 54650756 SGSDWIKILIRDAETGKDLSEVLEKVKFSEISWTKDNKGFFYGRYPDQDGK-----TDGSETKQENQKLYYHRVGESQDKD TLVVEFP-  
 73973662 SGSDWVTIKFMKVDGAKELPDVLERVKFSCMAWTHDGGKGMFYNSYPQQDGK-----SDGTETSTNLHQKLCYHVLGTDQSEDLCAEFP-  
 73973660 SGSDWVTIKFMKVDGAKELPDVLERVKFSCMAWTHDGGKGMFYNSYPQQDGK--REAGTETSTNLHQKLCYHVLGTDQSEDLCAEFP-  
 47222200 SGSDWVTIHF IKADDLSKLPDVLERVKFSCLAWTHDAKGIFYNYPQEGK-----TDGTETTANVNQKLYYHVLGTQSQSEDLVVAEFP-  
 73973664 SGSDWVTIKFMKVDGAKELPDVLERVKFSCMAWTHDGGKGMFYNSYPQQDGK-----SDGTETSTNLHQKLCYHVLGTDQSEDLCAEFP-  
 55235507 SGSDWTKLKIRNVETGEDFPETIEHTKVFVTASWTKDNKGFFYARYPVVAGK-----ADGSETAANENQKLYYHRVGESQDKDVLIAEFP-  
 73973658 SGSDWVTIKFMKVDGAKELPDVLERVKFSCMAWTHDGGKGMFYNSYPQQDGKSDVNLESGETETSTNLHQKLCYHVLGTDQSEDLCAEFP-  
 71666762 KGSDWQRIHVRRADTVEDTSDVIEWAKFTTIAWVHN-LGFFYTRYPALQGD---VDKGAETDAAQDAFICFHRIGRPQDEDDVVLVSV-  
 49523575 KGSDWQHIHVRRADTAEDTEDVIEWAKFTGISWLHN-TGFFYTRFPALKGD---VDKGAETDAAKDPFVCFHRLGKQDEDDAVVLSLP-  
 71747962 KGSDWQHIHVRRADTAEDTEDVIEWAKFTGISWLHN-TGFFYTRFPALKGD---VDKGAETDAAKDPFVCFHRLGKQDEDDVVLVSV-  
 33317309 KGSDWQRIHVRRADTVEDTSDVIEWAKFTAIAWVHN-LGFFYTRYPALQGD---VDKGAETDAAQDAFICFHRIGRPQDEDDVVLVSV-  
 47224662 SGSDWVEIHFLRVEDALLLEDRLKRVKFSMSWTHDGGKGLFYNSYPDQEGK-----SDGTETSTNLHQKLYYHVLGTDQSEDLCAEFP-  
 15291259 SGSDWIKILIRDAETGKDLSEVLEKVKFSEISWTKDNKGFFYGRYPDQDGK-----TDGSETKQENQKLYYHRVGESQDKD TLVVEFP-  
 73973656 SGSDWVTIKFMKVDGAKELPDVLERVKFSCMAWTHDGGKGMFYNSYPQQDGK-----SDGTETSTNLHQKLCYHVLGTDQSEDLCAEFP-

\*:\* \* : \* \* \* : \* : \* : \*

Prim.cons. SGSDWVTIKVMDVETGKELPDVLEWVKFSGISWTHDGGKGGFYSSYPKPDGGED2N2SDGTETSTNLHQKLYYHVLGTDQSEDLVCFEFP

370 380 390 400 410 420 430 440 450

|           |     |   |   |   |   |   |   |   |   |   |   |   |   |   |   |   |   |   |   |   |   |   |   |   |   |   |   |   |   |   |   |   |   |   |   |   |   |   |     |       |       |       |    |       |       |       |       |   |   |       |   |   |   |   |   |   |   |   |   |   |   |   |   |   |   |   |   |   |   |   |   |   |   |   |   |   |   |   |   |   |   |
|-----------|-----|---|---|---|---|---|---|---|---|---|---|---|---|---|---|---|---|---|---|---|---|---|---|---|---|---|---|---|---|---|---|---|---|---|---|---|---|---|-----|-------|-------|-------|----|-------|-------|-------|-------|---|---|-------|---|---|---|---|---|---|---|---|---|---|---|---|---|---|---|---|---|---|---|---|---|---|---|---|---|---|---|---|---|---|---|
| 62738741  | PEL | P | K | R | G | H | G | A | S | V | S | S | D | G | R | W | V | V | I | S | S | E | G | T | D | P | V | N | T | V | H | V | A | R | V | T | N | G | --- | K     | I     | G     | P  | ----- | V     | T     | A     | L | I | P     | D | L | K | A | Q | W | D | F | V | D | G | V | G | D | Q | L | W | F | V | S | G | D | G | A | P |   |   |   |   |   |   |
| 87200538  | P   | D | N | P | R | L | Y | H | S | A | E | T | T | H | D | Q | R | W | L | V | V | S | T | S | T | G | S | E | K | G | N | A | V | L | A | R | I | G | G   | ----- | D     | W     | K  | ----- | V     | Q     | P     | L | V | S     | T | L | A | D | E | W | S | L | I | A | G | I | G | D | R | L | W | F | V | T | S | K | D | A | P |   |   |   |   |   |   |
| 103487461 | P   | D | K | P | K | L | N | N | S | A | L | V | T | D | D | G | D | Y | L | L | V | V | S | S | E | G | T | D | E | R | Y | G | L | T | L | H | P | L | G   | R     | ----- | P     | G  | A     | K     | ----- | P     | I | V | L     | V | D | D | Y | A | N | N | W | E | Y | V | T | N | A | G | T | R | F | T | F | L | T | N | K | G | A | P |   |   |   |   |
| 87200537  | P   | D | H | P | E | W | S | H | K | A | L | V | T | S | D | G | R | W | A | V | V | V | S | E | I | S | T | D | K | R | N | A | V | H | L | I | R | L | T   | G     | R     | E     | -- | R     | -     | G     | T     | W | K | ----- | A | E | A | L | V | P | D | I | A | D | H | W | K | L | V | A | G | I | G | E | R | L | W | F | L | T | D | R | G | A | P |
| 94496227  | P   | D | R | P | R | L | S | H | Q | A | Q | V | T | A | D | G | R | W | L | V | V | S | S | F | E | G | I | D | P | R | R | E | I | H | V | A | P | L | T   | G     | ----- | G     | P  | I     | V     | ----- | L     | R | R | L     | V | R | G | P | A | Q | D | W | R | L | I | G | S | R | G | S | T | L | Y | F | L | T | D | H | R | A | P |   |   |   |   |
| 35211243  | K   | D | Q | K | E | W | G | F | G | G | E | V | S | E | D | G | R | Y | L | V | I | N | S | Q | G | T | D | P | K | N | R | V | F | Y | K | D | L | Q | N   | ----- | N     | S     | G  | R     | ----- | V     | M     | E | L | L     | P | D | A | A | A | Y | T | F | I | G | N | D | G | P | R | F | W | F | V | T | D | K | E | A | P |   |   |   |   |   |   |
| 32448009  | P   | D | H | P | K | W | G | F | G | A | S | V | T | D | D | G | R | Y | L | V | I | S | N | W | K | G | T | E | P | K | T | Q | V | F | I | Q | D | L | T   | I     | E     | D     | -- | A     | -     | P     | ----- | V | R | G     | L | I | M | G | F | D | A | D | Y | S | F | V | G | S | V | G | S | T | L | Y | F | L | T | D | H | E | A | P |   |   |   |
| 75906687  | L   | D | Q | K | E | W | G | F | N | G | V | V | T | E | D | G | C | Y | L | I | I | S | V | W | L | G | T | S | R | N | L | V | F | Y | K | D | L | T | N   | ----- | P     | N     | T  | E     | ----- | V     | V     | E | L | I     | D | Q | F | E | A | D | Y | S | F | I | D | N | D | E | S | V | F | F | R | T | D | L | D | A | P |   |   |   |   |   |   |
| 35211187  | K   | D | Q | K | E | W | G | F | G | G | E | V | S | E | D | G | R | Y | L | V | I | S | V | S | Q | G | T | D | P | K | N | R | V | F | Y | K | D | L | A   | D     | ----- | P     | A  | S     | A     | ----- | V     | V | E | L     | L | P | E | A | D | A | A | Y | E | F | I | D | N | D | G | L | F | W | F | T | D | K | D | A | P |   |   |   |   |   |   |
| 67921530  | P   | D | E | K | E | W | G | F | S | G | R | V | T | E | D | G | Q | Y | L | I | I | S | V | W | Q | G | T | D | T | K | N | L | V | F | Y | K | N | L | S   | Q     | ----- | E     | N  | S     | K     | ----- | I     | I | E | L     | I | N | Q | F | E | A | D | Y | S | F | I | D | N | K | G | S | K | F | Y | F | R | T | D | L | N | A | P |   |   |   |   |
| 67930945  | P   | D | R | P | A | W | S | I | D | P | V | L | T | D | D | G | R | Y | L | L | I | M | S | S | G | I | P | G | K | N | M | L | S | F | Q | D | M | Q | S   | ----- | P     | D     | R  | R     | ----- | I     | V     | D | L | I     | P | M | E | T | A | S | Y | Q | P | I | E | A | V | G | S | T | L | Y | V | Q | T | D | G | A | P |   |   |   |   |   |   |
| 17131625  | L   | D | Q | K | E | W | G | F | N | G | V | V | S | E | D | G | C | Y | L | I | I | S | V | W | L | G | T | S | R | N | L | V | F | Y | K | D | L | T | N   | ----- | L     | H     | A  | E     | ----- | V     | V     | E | L | I     | N | Q | F | E | A | D | Y | S | F | I | D | N | D | E | S | V | F | F | R | T | D | W | D | A | P |   |   |   |   |   |   |
| 86609965  | P   | D | Q | K | E | W | G | F | A | G | G | V | T | E | D | G | N | Y | L | I | I | S | V | W | R | G | T | D | P | K | N | L | I | F | Y | K | D | L | R   | D     | ----- | P     | Q  | S     | P     | ----- | V     | V | E | L     | I | R | E | F | E | A | E | Y | S | F | V | G | N | D | G | S | R | F | W | L | L | T | D | C | Q | A | P |   |   |   |   |
| 83859556  | P   | D | N | P | E | V | G | W | R | G | F | V | S | D | D | G | Q | Y | L | I | I | N | S | S | T | G | T | D | - | G | N | G | V | H | I | L | D | L | E   | T     | ----- | E     | G  | A     | E     | ----- | P     | V | E | I     | F | E | G | F | G | N | N | H | S | Y | V | G | N | D | G | E | T | F | W | F | Q | T | D | L | D | A | S |   |   |   |   |
| 28808634  | E   | E | E | K | Y | R | Y | V | G | G | Y | T | S | D | D | E | R | Y | L | F | I | S | A | S | V | S | T | S | - | G | N | K | L | F | F | K | D | L | S   | K     | P     | ----- | N  | S     | P     | ----- | L     | K | T | I     | L | D | N | T | S | S | D | T | W | I | D | N | Q | G | T | K | L | Y | L | V | T | N | L | N | A | P |   |   |   |   |   |
| 75854458  | E   | E | E | K | Y | R | Y | V | G | G | Y | T | S | D | D | E | R | Y | L | F | I | S | A | S | V | S | T | S | - | G | N | K | L | F | F | K | D | L | S   | K     | P     | ----- | N  | S     | P     | ----- | L     | K | T | I     | L | D | N | T | S | S | D | T | W | I | D | N | Q | G | T | K | L | Y | L | V | T | N | L | N | A | P |   |   |   |   |   |
| 86607173  | P   | D | Q | K | E | W | G | F | A | G | G | V | T | E | D | G | D | Y | L | I | I | S | V | W | R | G | T | D | P | K | N | L | L | F | Y | K | D | L | R   | D     | ----- | P     | S  | S     | P     | ----- | V     | V | E | L     | I | R | E | F | Q | A | E | Y | A | F | V | G | N | D | G | S | R | F | W | L | L | T | D | L | Q | A | P |   |   |   |   |
| 23128197  | P   | D | Q | K | E | W | G | F | S | G | G | V | T | E | D | G | H | Y | L | I | I | S | I | W | L | G | T | D | S | K | N | L | V | F | F | K | D | L | T   | N     | ----- | P     | N  | A     | E     | ----- | V     | V | E | L     | I | N | Q | F | E | A | D | Y | S | F | I | E | N | D | S | F | F | Y | F | R | T | D | L | N | A | P |   |   |   |   |   |
| 91226380  | K   | D | E | K | Y | R | Y | V | G | G | Y | T | S | E | D | E | R | Y | L | F | I | S | A | S | V | S | T | S | - | G | N | K | L | F | F | K | D | L | S   | K     | P     | ----- | N  | S     | P     | ----- | L     | K | T | I     | L | D | N | T | S | S | D | T | W | I | D | N | Q | G | T | K | L | Y | L | V | T | N | L | N | A | P |   |   |   |   |   |
| 88711708  | P   | E | E | K | H | R | Y | I | G | A | V | S | E | D | N | R | Y | L | T | I | S | A | S | T | S | T | S | - | G | N | K | L | F | I | K | D | L | T | K   | P     | ----- | N     | S  | K     | ----- | L     | V     | T | I | L     | D | H | T | D | T | S | Y | I | I | E | N | V | G | S | K | L | Y | I | V | T | N | M | D | A | P |   |   |   |   |   |   |
| 110167745 | P   | E | Q | K | E | W | S | F | N | C | H | V | T | E | D | N | K | Y | L | I | I | T | V | W | Q | S | T | E | R | K | N | L | V | F | Y | Q | D | L | S   | I     | ----- | P     | N  | A     | P     | ----- | I     | V | E | L     | I | S | E | F | E | A | E | Y | L | L | I | D | N | Y | Q | N | I | F | W | F | F | T | D | L | N | A | P |   |   |   |   |
| 109899092 | D   | E | Q | K | N | R | Y | V | S | G | Q | V | T | E | D | N | R | Y | L | L | I | S | A | A | V | S | T | S | - | G | N | K | L | Y | L | K | D | L | S   | E     | P     | ----- | D  | S     | P     | ----- | L     | V | T | I     | E | N | T | S | D | T | N | L | L | D | N | E | G | S | T | L | L | F | V | T | N | L | D | A | P |   |   |   |   |   |   |
| 86144168  | P   | E | Q | K | H | R | Y | I | G | A | G | T | T | E | D | N | K | Y | L | I | L | S | A | S | N | A | T | S | - | G | N | K | L | Y | I | K | D | L | S   | K     | P     | ----- | N  | A     | D     | ----- | F     | V | A | I     | V | D | T | E | E | T | N | T | S | V | I | E | N | V | G | S | K | L | Y | I | V | T | D | K | D | A | P |   |   |   |   |
| 4973227   | P   | A | Q | H | H | R | Y | V | G | A | T | V | T | E | D | D | R | F | L | L | I | S | A | A | N | S | T | S | - | G | N | R | L | Y | V | K | D | L | S   | Q     | E     | ----- | N  | A     | P     | ----- | L     | L | T | V     | Q | G | D | L | D | A | D | V | S | L | V | D | N | K | G | S | T | L | Y | L | L | T | N | R | D | A | P |   |   |   |   |
| 6048357   | P   | A | Q | H | H | R | Y | V | G | A | T | V | T | E | D | D | R | F | L | L | I | S | A | A | N | S | T | S | - | G | N | R | L | Y | V | K | D | L | S   | Q     | E     | ----- | N  | A     | P     | ----- | L     | L | T | V     | Q | G | D | L | D | A | D | V | S | L | V | D | N | K | G | S | T | L | Y | L | L | T | N | R | D | A | P |   |   |   |   |
| 76875127  | D   | E | Q | K | H | R | Y | V | G | A | D | V | T | H | D | G | R | Y | L | L | I | S | A | S | T | S | T | S | - | G | N | K | L | F | I | K | D | L | T   | Q     | K     | ----- | D  | S     | E     | ----- | F     | V | T | I     | V | G | N | T | S | D | T | S | V | I | D | N | E | G | S | K | L | F | L | V | T | N | L | N | A | P |   |   |   |   |   |
| 216201    | P   | A | Q | R | H | R | Y | V | G | A | T | V | T | E | D | D | R | Y | L | L | I | S | A | A | D | S | T | S | - | G | N | R | L | Y | V | K | D | L | T   | R     | E     | ----- | G  | A     | P     | ----- | L     | L | T | V     | Q | G | D | L | A | A | D | V | S | L | V | D | N | K | G | S | R | L | Y | L | L | T | N | R | D | A | P |   |   |   |   |
| 88804657  | P   | E | Q | K | H | R | Y | I | R | A | S | V | T | E | D | Q | R | Y | L | I | L | S | A | A | N | T | S | - | G | N | K | L | F | I | Q | D | L | Q | D   | P     | ----- | G     | S  | G     | ----- | L     | K     | T | I | V     | G | D | E | E | S | D | S | Y | V | I | E | N | S | G | S | K | L | Y | I | V | T | D | R | D | A | P |   |   |   |   |   |
| 89517967  | P   | D | Q | K | Y | R | Y | V | G | G | V | T | D | D | Q | N | Y | L | V | I | S | A | S | T | S | T | N | - | G | G | M | F | M | K | E | L | N | K | P   | ----- | N     | A     | P  | ----- | L     | V     | T     | V | L | D     | N | F | D | T | N | T | Y | L | L | H | N | E | G | S | K | L | W | L | V | T | D | Y | N | A | P |   |   |   |   |   |   |
| 90588230  | A   | D | Q | K | R | R | Y | V | G | G | Y | V | T | E | D | N | H | Y | L | V | I | T | A | A | N | S | T | Y | - | G | N | E | L | Y | I | K | D | L | K   | T     | P     | ----- | N  | S     | P     | ----- | I     | I | T | I     | V | D | N | F | N | T | D | N | S | I | I | E | N | E | G | T | K | L | F | I | H | T | D | Y |   |   |   |   |   |   |   |

91215481 EA EK HRYVSGNVTE D D R Y L V I S A S I S T S - G N K L M I K D L T N P - - - - - D S D - - - - - F I E V V D N Y D S D V Y V I E N K G S K L F M V T D K D A P  
 78688320 P Q N K D W G F G I D V S E Q G E Y L L L S I S Q G T D K R N R F F Y K S L F E - - - - - P K A Q - - - - - V V E L I L N L E A E Y E F L G N D G A V F Y F K T D L D A P  
 24374294 P Q N K D W G F G I D V S E K G E Y L L L S I S Q G T D K R N R F F Y K S L F E - - - - - P K A Q - - - - - V V E L I L K L E A E Y E F L G N D G T V F Y F K T D L D A P  
 456523 D K F P R R Y I G A Y V T D D Q R Y L V V S A A N A T N - G N E L Y I K D L K N - - - - - K T D - - - - - F I P I I T G F D S N V N V A D T D G D T L Y L F T D K D A P  
 77816782 P Q N K D W G F K I D V S E Q G E Y L L L S I S Q G T D K R N R F F Y K S L F E - - - - - P K S Q - - - - - V V E L I L N L E A E Y E F L G N D G S V F Y F K T D L D A P  
 68547790 P D Q P E W G F S S T V S D D G N F L L I S V S V G T D S R N R F F Y K P L K D - - - - - K S L K - - - - - V V E L M S E L E A E Y Q F L G N E G P V F Y F K T D L D A P  
 82744257 P Q N K D W G F K I D V S E Q G E Y L L L S I S Q G T D K R N R F F Y K S L F E - - - - - P K S Q - - - - - V V E L I L N L E A E Y E F L G N D G S V F Y F K T D L D A P  
 86131249 A A E K H R Y V G G S V T K D N R Y L L V S A R S S T S - G G K L F M K D L T K P - - - - - G S D - - - - - F V T I L G H E D S D S Y V M E N V G S K L F I A T N L D A P  
 88796133 D G K P T W N P Y P L V I Q D G E T L L I S V F E G Y E - A N G V Y A K S L K E - - - - - K N S K - - - - - L I P I F D K W D G R Y D F I G E K E D T L F F T S T A D A P  
 42526704 K D H P L R S F S A S T T E D E K T L L L T A F E V G S E G N M L F V A D L S E G L - - P K C S H C - - - - - F K Q Y N T H F N D S V W P L E T E N G F L Y L L T N K Q A P  
 27367204 E G E L H R Y V Y G Q T S E D D R Y L V I S G H E S T S - G N R L F Y V D L Q S D - - - - - E R Q - - - - - I Y T L L D H V D S D T H L L D S T D R E F L L Y T N L D A P  
 37676919 E G E L H R Y V Y G Q T S E D D R Y L V I S G H E S T S - G N R L F Y V D L Q S D - - - - - E R Q - - - - - I Y T L L D H V D S D T H L L D S T D R E F L L Y T N L D A P  
 7585979 D T Q V H R Y V S G T T T T D D R F L I I S G A E S T S - G N R L F Y I D L Q S E - - - - - S Q A - - - - - I V T L R D T T Q G D T Y L I D S Q D E T L L L Y T N L D A P  
 28809898 G A Q I H R Y V S G T T T T D D R F L I I S G A E S T S - G N R L F Y I D L Q S D - - - - - S Q A - - - - - I V T L R D T T Q G D T Y L I D S Q D E T L L L Y T N L D A P  
 6460324 P D Q P D W G F A A E V T E D G A W L A V Q V W L G T S P K N L L W V R P L G K E G - - P - G S G D - - - - - F Q P L V N D F Q A M Y Q L V G S D G N T L F L Q T D E D A P  
 91223249 D T Q V H R Y V S G T T T T D D R F L I I S G A E S T S - G N R L F Y I D L Q S E - - - - - L Q A - - - - - I V T L R E T T Q G D T Y L I D S Q D A T L L L Y T N L D A P  
 56180108 D N Q P E L N P Y A K V S D D G K Y L L I D V F K G Y D - A N A V Y L R P L A Q - - - - - E N A P - - - - - F K G L F T K W D G Q Y Q Y V T S Q K G L L Y F K T T N E A S  
 55769741 - E H P K Y S F G A S V T E D G K Y I I L G T Y E G C D P V N K L Y Y C E I C T - L P Q G I E G F K E T K G - - M L P F V K L I D N F D A Q Y H V V A N D G D E F T F L T N R N A P  
 47507507 - E E P K W M G G A E V T D D G Q Y V L L S I R E G C D P V N R L W Y C K L N K - N - T G I T G T L - - - - - P W V K L I D N F E A E Y E Y I T N E G T I F T F K T N R N A P  
 28502989 - E E P K W M G G A E V T D D G Q Y V L L S I R E G C D P V N R L W Y C K L N K - N - T G I T G T L - - - - - P W V K L I D N F E A E Y E Y I T N E G T I F T F K T N R N A P  
 86144914 N A E Q H R Y V S G Y T T E D D R Y L I I L G R E S T S - G N R L F Y I D L N S P - - - - - E Q Q - - - - - L N T L I D H V D S D T Y L I D N Q D E T F I L Y T N L D A P  
 84386759 N A E Q H R Y V S G Y T T E D D H Y L I I L G R E S T S - G N R L F Y I D L N S P - - - - - E Q S - - - - - L N T L I D H V D S D T Y L I D N Q D E V F I L Y T N L D A P  
 63100723 - D E P K W M S G V E V S D D G R Y V L L S I R E G C D P V N R L W Y C D L N E - E P Q G I T G L L - - - - - P W V K L I D N F D A E Y E Y V T N E G T V F T F K T N L E A P  
 38649021 - E E P K W M G G A E V T D D G Q Y V L L S I R E G C D P V N R L W Y C K L D K - N - T G I T G I L - - - - - P W V K L I D N F D A E Y E Y I T N E G T V F T F K T N R N A P  
 59711729 E E E K H R Y V S G Y T T E D D A Y L V I S A S T S T S - G N K L F I E P L N R D - - - - - S S Y - - - - - R L T V L D H T D S D T Y V I E N E D T H L L M F T N L N A P  
 6755152 - D E P K W M G G A E L S D D G R Y V L L S I W E G C D P V N R L W Y C D L Q Q - E P N G I T G I L - - - - - K W V K L I D N F E G E Y D Y V T N E G T V F T F K T N R N S P  
 74215349 - D E P K W M G G A E L S D D G R Y V L L S I W E G C D P V N R L W Y C D L Q Q - E P N G I T G I L - - - - - K W V K L I D N F E G E Y D Y V T N E G T V F T F K T N R N S P  
 50514023 - D E P K W M G G A E L S D D G R Y V L L S I R E G C D P V N R L W Y C D L Q Q - E S N G I T G I L - - - - - K W V K L I D N F E G E Y D Y V T N E G T V F T F K T N R H S P  
 26345256 - D E P K W M G G A E L S D D G R Y V L L S I W E G C D P V N R L W Y C D L Q Q - E P N G I T G I L - - - - - K W V K L I D N F E G E Y D Y V T N E G T V F T F K T N R N S P  
 157879458 - D E P K W M G G A E L S D D G R Y V L L S I R E G C D P V N R L W Y C D L Q Q - E S N G I T G I L - - - - - K W V K L I D N F E G E Y D Y V T N E G T V F T F K T N R H S P  
 51592147 - D E P K W M G G A E L S D D G R Y V L L S I R E G C D P V N R L W Y C D L Q Q - E S N G I T G I L - - - - - K W V K L I D N F E G E Y D Y V T N E G T V F T F K T N R H S P  
 10835490 - D E P K W M G G A E L S D D G R Y V L L S I R E G T D P V N R L W Y C D L Q Q - E S N G I T G I L - - - - - K W V K L I D N F E G E Y D Y V T N E G T V F T F K T N R H S P  
 50514022 - D E P K W M G G A E L S D D G R Y V L L S I R E G T D P V N R L W Y C D L Q Q - E S N G I T G I L - - - - - K W V K L I D N F E G E Y D Y V T N E G T V F T F K T N R H S P  
 37928243 - D E P K W M G G A E L S D D G R Y V L L S I R E G C D P V N R L W Y C D L Q Q - E S N G I T G I L - - - - - K W V K L I D N F E G E Y D Y V T N E G T V F T F K T N R H S P  
 27065055 - D E P K W M G G A E L S D D G R Y V L L S I R E G C D P V N R L W Y C D L Q Q - E S N G I T G I L - - - - - K W V K L I D N F E G E Y D Y V T N E G T V F T F K T N R H S P  
 5103285 - D E P K W M G G A E L S D D G R Y V L L S I R E G C D P V N R L W Y C D L H Q - E P N G I T G I L - - - - - K W V K L I D N F E G E Y D Y V T N E G T V F T F K T N R H S P

13786144 -DEPKWMGGAELSDDGRYVLLSIEWEGCDPVNRLWYCDLQQ-GSNGINGIL-----KWKVLIDNFEGEYDYITNEGTVFTFKTNRNSP  
5107662 -DEPKWMGGAELSDDGRYVLLSIREGXDPVNRLWYCDLQQ-ESNGITGIL-----KWKVLIDNFEGEYDYVTNEGTVFTFKTNRHSP  
79382269 -ENPKYMFGAEVTDGKYLIMSIGESCDPVNRLYYCDMTS-LSGGLESFRGSSS--FLPFIKLVDTFDAQYSVISNDETLFTFLTNKDAP  
27066372 -DEPKWMGGAELSDDGRYVLLSIREGCDPVNRLWYCDLQQ-ESNGITGIL-----KWKVLIDNFEGEYDYVTNEGTVFTFKTNRHSP  
19347837 -ENPKYMFGAEVTDGKYLIMSIGESCDPVNRLYYCDMTS-LSGGLESFRGSSS--FLPFIKLVDTFDAQYSVISNDETLFTFLTNKDAP  
109072195 -DEPKWMGGAELSDDGRYVLLSIREGCDPVNRLWYCDLQQ-ESNGITGIL-----KWKVLIDNFEGEYDYVTNEGTVFTFKTNRHSP  
11691900 -DEPKWMGGAELSDDGRYVLLSIREGCDPVNRLWYCDLQQ-ESSGIAGIL-----KWKVLIDNFEGEYDYVTNEGAVFTFKTNRQSP  
41349456 -DEPKWMGGAELSDDGRYVLLSIREGCDPVNRLWYCDLQQ-ESSGIAGIL-----KWKVLIDNFEGEYDYVTNEGTVFTFKTNRQSP  
558596 -DEPKWMGGAELSDDGRYVLLSIREGCDPVNRLWYCDLQQ-ESSGIAGIL-----KWKVLIDNFEGEYDYVTNEGTVFTFKTNRQSP  
53127346 -DEPKWMGGAELSDDGRYVLLSIREGCDPVNRLWYCDLQK-ESQGISGIL-----QWVKLIDNFEAEYDYVTNEGTVFTFKTNRHSP  
904214 -DEPKWMGGAELSDDGCYVLLSIREGCDPVNRLWYCDLQQ-ESSGIAGIL-----KWKVLIDNFEGEYDYVTNEGAVFTFKTNRQSP  
15217929 -DNPKHMFGSKVTDDGKYLIMSIEEGCDPVNRYHCDLSL-LPKGLEGFRGSNT--LLPFVKLIDTFDAQYIAIANDETLFTFLTNKDAP  
9558588 -DNPKHMFGSKVTDDGKYLIMSIEEGCDPVNRYHCDLSL-LPKGLEGFRGSNT--LLPFVKLIDTFDAQYIAIANDETLFTFLTNKDAP  
38345850 -DHPKYIYTPEVSEDGKYVILSVAETSEPVNRLYYCDLSA-LPDGLEGMKGNHGNAMLFPVKLVDEFEAAYALIANDDTQFTFLTNKNAP  
91082735 -DDPHLRIGAHVSHCGKYLVIITGKTKGCK-NNLYFAQLD--SGKITGKLK-----LTEVVTEFVADFEYITNDKNLFYFHTNKNAS  
54650756 -EEPSWRIQSTVSDCGKYLI LAIVKDCR-DNIVFYADLTP-GAEITSKLN-----VKKIVEKFEADYDYITNEGSKIFFRTNKNAP  
73973662 -DEPKWMGGAELSDDGRYVLLSIREGCDPVNRLWYCDLQQ-ESNGISGKL----SFKQWVKLIDNFEGEYDYVTNEGTVFTFKTNRHSP  
73973660 -DEPKWMGGAELSDDGRYVLLSIREGCDPVNRLWYCDLQQ-ESNGISGMLGLSP-GILKWKVLIDNFEGEYDYVTNEGTVFTFKTNRHSP  
47222200 -QHPKWHSSATISDDGRYAVLSITEGCEPVNQLWYCDLQQ-LPDGITGLL-----PWVKLVNDFEAQYSYITNEGTVFTFHSNLEAP  
73973664 -DEPKWMGGAELSDDGRYVLLSIREGCDPVNRLWYCDLQQ-ESNGISGMLGLSP-GILKWKVLIDNFEGEYDYVTNEGTVFTFKTNRHSP  
55235507 -EEPSWRLMPEVSDCGKYLM LFIMKGCK-DMLLYFSNLEK-AGTLESKLD-----FVKVVTEFDSYDYVTNEDNIFSFRTNKVAP  
73973658 -DEPKWMGGAELSDDGRYVLLSIREGCDPVNRLWYCDLQQ-ESNGISGFQ--STA-GILKWKVLIDNFEGEYDYVTNEGTVFTFKTNRHSP  
71666762 -EHPQWNMGASVSDCHSYVIVVLFDFGCEPHNLVWVAELPS-VEKGLGSEP-----LVFKKLVNEFAGRYTYLGNEGSTFYFVTTTRDAP  
49523575 -EHPHWGVSAEVSCHSYLVVSITDGCEPKNL IWITKLPIDGAEKLSPT-----LTYNKLFNEFVGSFEYLGNDGTTFYFVTTTRDAP  
71747962 -EHPHWGVSAEVSCHSYLVVSITDGCEPKNL IWITKLPIDGAEKLSPT-----LTYNKLFNEFVGSFEYLGNDGTTFYFVTTTRDAP  
33317309 -EHPQWNMGASVSDCHSYVIVVLFDFGCEPHNLVWVAELPS-VEKGLGSEP-----LVFKKLVNEFAGRYTYLGNEGSTFYFVTTTRDAP  
47224662 -DHPKWMGSAEVSSEDGRYVLLSIREGCDPVNRLWYCDLKT-IPQGITGLL-----PWVKLIDNFDAEYDYVTNEDTQFTFKTNLDAP  
15291259 -EEPSWRIQSTVSDCGKYLI LAIVKDCR-DNIVFYADLTP-GAEITSKLN-----VKKIVEKFEADYDYITNEGSKIFFRTNKNAP  
73973656 -DEPKWMGGAELSDDGRYVLLSIREGCDPVNRLWYCDLQQ-ESNGISGIL-----KWKVLIDNFEGEYDYVTNEGTVFTFKTNRHSP

Prim.cons. PDEPKWMGGAEVSDGRYLLSIREGTDPVNRLFYCDLQQEPESNGITG2LGSS4NG2LKWKVLIDNFEAEYDYITNEGTVFTFKTNRDAP

460 470 480 490 500 510 520 530 540

|           |         |     |          |          |        |       |        |      |      |      |        |        |        |     |       |     |     |     |     |     |     |     |        |     |    |    |      |      |    |     |   |   |   |   |    |   |     |   |   |   |    |   |    |    |    |   |    |   |   |   |    |    |    |   |    |   |   |   |   |   |   |    |   |   |   |   |   |   |   |   |   |   |
|-----------|---------|-----|----------|----------|--------|-------|--------|------|------|------|--------|--------|--------|-----|-------|-----|-----|-----|-----|-----|-----|-----|--------|-----|----|----|------|------|----|-----|---|---|---|---|----|---|-----|---|---|---|----|---|----|----|----|---|----|---|---|---|----|----|----|---|----|---|---|---|---|---|---|----|---|---|---|---|---|---|---|---|---|---|
| 62738741  | LKKIVRV | DL  | SGST     | -----PR  | -----  | FDTVV | PESKDN | LES  | --VG | IAGN | RLFASY | I      | HD     | AKS | QV    | LAF | FDL | -DG | KP  | AG  | AV  | SLP |        |     |    |    |      |      |    |     |   |   |   |   |    |   |     |   |   |   |    |   |    |    |    |   |    |   |   |   |    |    |    |   |    |   |   |   |   |   |   |    |   |   |   |   |   |   |   |   |   |   |
| 87200538  | RKKVVM  | VDM | SGAA     | -----PV  | -----  | TTT   | VVPE   | SDDV | LES  | --AK | VVGD   | RVL    | GL     | YLR | VD    | VKA | EL  | RL  | ATL | -DG | KP  | AG  | TALP   |     |    |    |      |      |    |     |   |   |   |   |    |   |     |   |   |   |    |   |    |    |    |   |    |   |   |   |    |    |    |   |    |   |   |   |   |   |   |    |   |   |   |   |   |   |   |   |   |   |
| 103487461 | RGRLV   | SF  | DIRKP    | -----DK  | -----  | LTEL  | V      | VAEN | PATL | VG   | --AS   | RVGD   | R      | I   | LS    | YLG | DAK | SE  | AR  | M   | VAL | -NG | EP     | I   | AN | IN | LA   |      |    |     |   |   |   |   |    |   |     |   |   |   |    |   |    |    |    |   |    |   |   |   |    |    |    |   |    |   |   |   |   |   |   |    |   |   |   |   |   |   |   |   |   |   |
| 87200537  | NYHLV   | RVD | SRPQ     | -----EG  | -----  | WQV   | VV     | PQR  | GNTL | EG   | --AR   | M      | I      | GD  | R     | FL  | LS  | YLR | D   | Q   | S   | V   | A      | M   | T  | D  | R    | -K   | GR | P   | G | K | A | I | T  | L | N   |   |   |   |    |   |    |    |    |   |    |   |   |   |    |    |    |   |    |   |   |   |   |   |   |    |   |   |   |   |   |   |   |   |   |   |
| 94496227  | HRRV    | VTL | DAANPR   | -----RR  | -----  | AQE   | I      | V    | PERA | QTL  | VG     | --GA   | L      | V   | GD    | R   | L   | I   | L   | A   | S   | M   | N      | G   | A  | Q  | T    | I    | A  | E   | L | V | E | L | -D | G | R   | R | V | G | D  | V | P  | L  | P  |   |    |   |   |   |    |    |    |   |    |   |   |   |   |   |   |    |   |   |   |   |   |   |   |   |   |   |
| 35211243  | RGRLV   | L   | IDTTRP   | -----LQ  | -----  | LQE   | V      | V    | PQ   | T    | DATL   | QS     | --AD   | I   | V     | GER | L   | F   | L   | R   | Y   | L   | K      | D   | A  | R  | S    | Q    | V  | K   | V | F | D | L | -K | G | K   | F | L | S | E  | V | A  | F  | P  |   |    |   |   |   |    |    |    |   |    |   |   |   |   |   |   |    |   |   |   |   |   |   |   |   |   |   |
| 32448009  | RRRV    | I   | SLDVAEHA | -----KRT | DDN    | VDE   | P      | A    | D    | R    | AGW    | E      | V      | I   | P     | Q   | S   | E   | H   | V   | L   | E   | H      | --V | S  | L  | S    | G    | V  | F   | F | A | N | L | A  | D | A   | L | N | Q | V  | E | R  | F  | S  | L | -D | G | S | P | M  | G  | P  | L | E  | L | P |   |   |   |   |    |   |   |   |   |   |   |   |   |   |   |
| 75906687  | RGRV    | I   | AIDIANP  | -----AKE | I      | ----- | WRE    | I    | I    | P    | Q      | A      | E      | A   | T     | L   | E   | S   | --V | N   | I   | L   | N      | N   | Q  | F  | I    | A    | G  | Y   | L | E | D | A | R  | S | Q   | V | K | I | F  | D | L  | -N | G  | T | L  | V | R | N | V  | E  | L  | P |    |   |   |   |   |   |   |    |   |   |   |   |   |   |   |   |   |   |
| 35211187  | RGRV    | V   | AIDITQP  | -----LH  | -----  | LNE   | L      | I    | P    | E    | S      | E      | D      | T   | L     | Q   | G   | --V | S   | I   | L   | D   | N      | K   | F  | F  | A    | N    | Y  | L   | K | D | A | H | T  | Q | V   | R | I | Y | D  | L | -Q | G  | Q  | Y | V  | G | E | V | E  | L  | L  |   |    |   |   |   |   |   |   |    |   |   |   |   |   |   |   |   |   |   |
| 67921530  | KGK     | V   | I        | AIDIDNS  | -----Q | PEN   | -----  | WQE  | I    | I    | P      | E      | S      | N   | E     | A   | L   | K   | G   | --V | G   | I   | L      | N   | N  | Q  | F    | V    | C  | D   | Y | L | Q | D | A  | K | S   | A | I | K | I  | H | D  | L  | -Q | G | N  | L | L | R | N  | V  | S  | L | P  |   |   |   |   |   |   |    |   |   |   |   |   |   |   |   |   |   |
| 67930945  | RGRV    | I   | AIDLQKPV | -----P   | S      | ----- | KW     | R    | I    | V    | P      | E      | A      | A   | E     | T   | L   | E   | S   | --V | Q   | M   | A      | D   | G  | K  | L    | L    | A  | M   | K | D | A | H | A  | A | R   | L | V | T | -E | G | K  | P  | V  | A | E  | V | A | M | P  |    |    |   |    |   |   |   |   |   |   |    |   |   |   |   |   |   |   |   |   |   |
| 17131625  | RGRV    | I   | AIDTANP  | -----S   | QEI    | ----- | WRE    | I    | I    | P    | Q      | A      | E      | A   | T     | L   | E   | S   | --V | N   | I   | L   | N      | N   | Q  | F  | I    | A    | D  | Y   | L | E | D | A | R  | S | Q   | V | K | I | F  | D | L  | -N | G  | T | L  | I | R | D | V  | E  | L  | P |    |   |   |   |   |   |   |    |   |   |   |   |   |   |   |   |   |   |
| 86609965  | RRRL    | V   | AIDLEQP  | -----D   | R      | ----- | VQE    | V    | I    | P    | E      | A      | E      | T   | L     | Q   | G   | --V | S   | L   | I   | N   | N      | Q   | F  | V  | A    | F    | Y  | L   | K | D | A | H | T  | Q | I   | K | T | F | A  | L | -D | G  | T  | Y | L  | G | E | I | P  | L  | P  |   |    |   |   |   |   |   |   |    |   |   |   |   |   |   |   |   |   |   |
| 83859556  | NGR     | I   | V        | S        | V      | S     | L      | S    | A    | P    | -----E | D      | -----  | L   | S     | D   | V   | V   | A   | E   | G   | D   | G      | P   | I  | T  | G    | --A  | S  | H   | V | G | G | H | L  | I | I   | E | T | M | R  | D | V  | A  | S  | A | V  | S | V | Y | T  | P  | -A | G | D  | F | V | R | E | V | A | L  | P |   |   |   |   |   |   |   |   |   |
| 28808634  | NKR     | V   | V        | T        | V      | D     | A      | S    | Q    | P    | Q      | P      | -----K | N   | W     | K   | D   | L   | I   | P   | E   | T   | K      | N   | V  | L  | R    | --V  | S  | T   | A | G | G | N | L  | F | A   | S | Y | I | V  | D | A  | I  | S  | M | V  | K | Q | Y | D  | M  | -N | G | K  | L | I | R | E | I | K | L  | P |   |   |   |   |   |   |   |   |   |
| 75854458  | NKR     | V   | V        | T        | V      | D     | A      | S    | Q    | P    | Q      | P      | -----K | N   | W     | K   | D   | L   | I   | P   | E   | T   | K      | N   | V  | L  | R    | --V  | S  | T   | A | G | G | N | L  | F | A   | S | Y | I | V  | D | A  | I  | S  | M | V  | K | Q | Y | D  | M  | -N | G | K  | L | I | R | E | I | K | L  | P |   |   |   |   |   |   |   |   |   |
| 86607173  | RRRL    | V   | AIDLDNP  | -----G   | Q      | ----- | LQE    | V    | I    | P    | E      | A      | E      | T   | L     | Q   | G   | --V | S   | L   | I   | H   | N      | Q   | F  | V  | A    | F    | Y  | L   | K | D | A | H | T  | Q | I   | R | T | F | A  | L | -D | G  | T  | Y | L  | G | E | I | P  | L  | P  |   |    |   |   |   |   |   |   |    |   |   |   |   |   |   |   |   |   |   |
| 23128197  | RGRV    | I   | AIDTQNP  | -----A   | SEK    | ----- | WRE    | I    | I    | P    | Q      | S      | A      | E   | T     | L   | E   | S   | --V | G   | I   | L   | N      | N   | Q  | F  | V    | A    | D  | Y   | L | K | D | A | H  | S | E   | I | K | I | F  | D | L  | -K | G  | G | F  | I | R | E | V  | E  | L  | P |    |   |   |   |   |   |   |    |   |   |   |   |   |   |   |   |   |   |
| 91226380  | NKR     | V   | V        | T        | V      | D     | A      | S    | Q    | P    | Q      | P      | -----K | N   | W     | K   | D   | L   | I   | P   | E   | T   | K      | N   | V  | L  | R    | --V  | S  | T   | A | G | G | N | L  | F | A   | S | Y | I | V  | D | A  | I  | S  | M | V  | K | Q | Y | D  | M  | -N | G | K  | L | I | R | E | I | K | L  | P |   |   |   |   |   |   |   |   |   |
| 88711708  | NQK     | I   | V        | T        | V      | D     | A      | A    | N    | P    | T      | P      | -----E | K   | W     | I   | D   | F   | I   | P   | E   | T   | E      | N   | V  | L  | S    | ---P | N  | T   | G | G | E | Y | F  | F | A   | E | Y | M | V  | D | A  | I  | S  | K | V  | F | Q | Y | D  | Y  | -D | G | N  | L | V | R | E | V | K | L  | P |   |   |   |   |   |   |   |   |   |
| 110167745 | KRRV    | I   | A        | I        | D      | I     | N      | N    | P    | P    | S      | P      | S      | L   | V     | R   | G   | E   | N   | Q   | N   | K   | -----W | Q   | E  | I  | I    | P    | E  | A   | T | D | A | L | Q  | G | --I | G | T | L | N  | N | Q  | F  | V  | T | F  | Y | L | K | D  | A  | H  | T | Q  | I | K | I | F | N | L | -D | G | S | P | V | R | N | V | E | L | P |
| 109899092 | NKR     | V   | V        | S        | V      | D     | A      | G    | Q    | P    | Q      | P      | -----E | N   | W     | Q   | D   | F   | I   | A   | Q   | T   | D      | N   | V  | L  | D    | ---V | S  | T   | G | G | G | Y | I  | F | A   | S | Y | M | V  | D | A  | I  | S  | N | V  | K | Q | L | D  | M  | -S | G | K  | L | V | R | E | I | A | L  | P |   |   |   |   |   |   |   |   |   |
| 86144168  | NRK     | I   | V        | T        | V      | D     | A      | A    | N    | P    | T      | P      | -----E | N   | W     | E   | D   | F   | I   | P   | E   | T   | E      | N   | V  | L  | S    | ---P | S  | T   | G | G | G | Y | F  | F | A   | E | Y | M | V  | D | A  | V  | S  | Q | V  | K | Q | Y | D  | Y  | -E | G | K  | L | V | R | E | V | E | L  | P |   |   |   |   |   |   |   |   |   |
| 4973227   | NRRL    | V   | T        | V        | D      | A     | A      | N    | P    | G    | P      | -----A | H      | W   | R     | D   | L   | I   | P   | E   | R   | H   | R      | V   | L  | T  | ---V | H    | S  | G   | T | A | Y | L | F  | A | E   | Y | M | V | D  | A | T  | A  | P  | V | E  | Q | F | D | Y  | -E | G  | K | R  | V | R | E | V | A | L | P  |   |   |   |   |   |   |   |   |   |   |
| 6048357   | NRRL    | V   | T        | V        | D      | A     | A      | N    | P    | G    | P      | -----A | H      | W   | R     | D   | L   | I   | P   | E   | R   | H   | R      | V   | L  | T  | ---V | H    | S  | G   | S | G | Y | L | F  | A | E   | Y | M | V | D  | A | T  | A  | P  | V | E  | Q | F | D | Y  | -E | G  | K | R  | V | R | E | V | A | L | P  |   |   |   |   |   |   |   |   |   |   |
| 76875127  | NQK     | V   | V        | T        | V      | D     | A      | A    | D    | P    | G      | P      | -----Q | N   | W     | Q   | D   | F   | I   | P   | E   | T   | K      | N   | V  | L  | K    | ---L | T  | K   | G | G | D | T | F  | F | A   | N | Y | M | V  | D | A  | I  | S  | K | V  | K | Q | Y | N  | K  | -K | G | E  | L | I | R | D | I | T | L  | P |   |   |   |   |   |   |   |   |   |
| 216201    | NRRL    | V   | T        | V        | E      | A     | D      | N    | P    | G    | P      | -----E | Q      | W   | R     | D   | L   | I   | P   | E   | R   | Q   | Q      | V   | L  | T  | ---V | H    | S  | G   | G | Y | L | F | A  | E | Y   | M | V | D | A  | T | A  | R  | V  | E | Q  | F | D | H | -D | G  | K  | R | V  | R | E | V | G | L | P |    |   |   |   |   |   |   |   |   |   |   |
| 88804657  | NKR     | I   | V        | T        | V      | D     | A      | S    | D    | P    | G      | P      | -----E | N   | W     | V   | D   | F   | I   | P   | E   | T   | E      | N   | V  | L  | S    | ---P | N  | T   | G | G | G | Y | F  | F | A   | E | Y | M | V  | D | A  | I  | S  | K | V  | L | Q | Y | D  | Y  | -Q | G | N  | L | V | R | E | V | G | L  | P |   |   |   |   |   |   |   |   |   |
| 89517967  | NKR     | I   | V        | S        | T      | D     | F      | S    | N    | P    | T      | Q      | -----E | N   | W     | T   | D   | V   | I   | S   | E   | T   | E      | N   | V  | L  | S    | ---P | N  | T   | G | G | G | Y | F  | F | A   | E | Y | M | V  | D | A  | V  | S  | K | I  | Q | Q | Y | N  | Y  | -D | G | T  | L | V | R | E | V | K | L  | P |   |   |   |   |   |   |   |   |   |
| 90588230  | NGR     | V   | V        | T        | V      | D     | F      | S    | N    | P    | K      | Q      | -----E | N   | W     | K   | D   | F   | I   | K   | E   | T   | E      | N   | V  | L  | S    | ---P | S  | T   | G | G | G | Y | F  | F | A   | N | Y | T | K  | D | A  | V  | S  | L | V  | L | Q | Y | D  | Y  | -N | G | K  | L | V | R | E | I | K | L  | P |   |   |   |   |   |   |   |   |   |
| 71143549  | NKK     | I   | V        | T        | V      | N     | A      | K    | A    | P    | A      | S      | -----K | N   | W     | T   | D   | F   | I   | A   | E   | T   | D      | Y   | V  | L  | S    | ---A | S  | T   | G | G | G | F | F  | F | T   | E | Y | M | V  | D | A  | I  | S  | K | V  | Y | Q | Y | D  | Y  | -Q | G | K  | Q | V | R | E | I | N | L  | P |   |   |   |   |   |   |   |   |   |
| 83855898  | NKK     | I   | V        | T        | V      | D     | A      | E    | N    | P    | S      | P      | -----E | N   | W     | V   | D   | F   | I   | P   | E   | T   | E      | H   | V  | L  | S    | ---P | S  | K   | A | G | G | Y | F  | F | A   | E | Y | M | V  | D | A  | V  | S  | E | V  | K | Q | Y | D  | Y  | -A | G | K  | L | I | R | E | V | K | L  | P |   |   |   |   |   |   |   |   |   |
| 85710915  | NGR     | V   | V        | V        | D      | A     | G      | A    | P    | Q    | E      | -----A | N      | W   | S     | D   | L   | I   | P   | E   | T   | E   | H      | V   | L  | N  | ---P | P    | T  | T   | G | A | G | Y | I  | F | A   | E | Y | M | V  | D | A  | V  | S  | Q | V  | K | Q | F | D  | Y  | -Q | G | K  | E | I | R | Q | I | D | L  | P |   |   |   |   |   |   |   |   |   |
| 78368715  | NGK     | I   | V        | A        | V      | D     | V      | N    | R    | P    | -----A | K      | A      | N   | ----- | W   | K   | T   | V   | V   | P   | E   | S      | S   | D  | P  | I    | A    | S  | --V | A | I | I | N | D  | H | L   | V | V | S | Y  | L | H  | D  | V  | L | G  | K | L | T | I  | F  | S  | M | -N | G | V | K | R | Q | D | V  | D | L | P |   |   |   |   |   |   |   |
| 56178266  | NQR     | V   | A        | I        | V      | D     | A      | S    | N    | P    | T      | P      | -----E | N   | W     | E   | D   | F   | I   | P   | E   | T   | E      | N   | V  | L  | S    | ---V | S  | T   | G | A | G | Y | I  | F | A   | E | Y | M | V  | D | A  | V  | A  | K | V  | K | Q | Y | A  | Y  | -N | G | M  | V | R | E | V | Q | L | P  |   |   |   |   |   |   |   |   |   |   |



91215481 NKKIVTVEASAPQP-----ENWEDFIPETEHVLS---PSTGAGYFFAEYMVDAVSQVKQYNY-EGELVRDIELP  
 78688320 NGKVIAIDTRNS-----DKSQ-----WQTIIPESKDPINK--VAIINDHLVVSYLHDVLDGQLSIFSM-GGQKRQDVTLP  
 24374294 NGKVIAIDTRNS-----DKSQ-----WQTIIPESKDPINK--VAIINDHLVVSYLHDVLDGQLSIFSM-GGQKRQEVTLPL  
 456523 NKRLVKTTIQNPKA-----ETWKDVI AETSEPLE---INTGGGYFFATYMKDAIDQVKQYDK-NGKLVRAIKLP  
 77816782 NGKVIAIDTRNS-----DKSQ-----WQTIIPESKDPINN--VAIINDHLVVSYLHDVLDGQLSIYSM-GGQKRQDVALP  
 68547790 RGRIIAVDTRNP-----AKDN-----WRTLVPESQDPIAE--VSIISEHLVVSYLHDVLDGQLSIYNM-DGVKREDVPLP  
 82744257 NGKVIAIDTRNS-----DKSQ-----WQTIIPESKDPINN--VAIINDHLVVSYLHDVLDGQLSIYSM-GGQKRQDVALP  
 86131249 NMRVVTVDASNPTP-----ENWVDFIPETENVLS---PSTGGGSFFARYMVDVAVSKVKQYDY-SGKLVRDVELP  
 88796133 TGKVVKVEFDNG-----VQS-----SETVIESTSDTLNS--VSLGKLFQAQYLKDVKGQVSVFDL-SGKQIDDISFS  
 42526704 FYRVVKTSLNINISE-----KSIDEVIPQKDCLLSS--AALCGGKLLTVYLRDQDEAFICGL-DGKNSTKINLP  
 27367204 NGKVVSVSDIES-----GQWRDVI AEQDQPLE---VVAAGGYLFATYMDVLDALSKVVQYSY-QGKKVREITLP  
 37676919 NGKVVSVSDIES-----GQWRDLIAEQDQPLD---AVAAGGYLFATYMDVLDVLSKVVQYSY-QGKQVREITLP  
 7585979 NGKVVSYNTRT-----AQWMDVI AEQEOPLE---ISKGGGYLFATYMDVLDVLSKVQQFNY-QGEWIRDVELP  
 28809898 NGKVVSYNTQT-----EQWADVI AEQEOPLE---ISKGGGYLFATYMDVLDVLSKVQQFTY-QGEWIRDVELP  
 6460324 LGKLMAWNIRTGE-----RR-----D---LLPEGADKLEQ--VLTVPGGFLALTLHDASHRLTLYDR-NGERQREIELP  
 91223249 NGKVVSYNTQT-----EQWADVI AEQEOPLE---ISKGGGYLFATYMDVLDVLSKVQQFNY-QGEWIRDVQLP  
 56180108 TGRVVAVDPKQSE-----PEN-----WTEIIAAKTHTLKD--VHAVNGQLFAHYLQSARSRVAIFDI-KGTMLQELALP  
 55769741 KNKLVVRVDIKKPE-----LWTDILPEHERDVLESADAVNGNQLLVCYMSDVKHILQIRDLVTGNLLHKLPL-  
 47507507 NYNRLINIDFNNPEE-----SNWKALVPEHQKDVLEWVSCVHKKFLVLCYLHDVKNILQLHDLDSGSHLKTFFPL-  
 28502989 NYNRLINIDFNNPEE-----SNWKALVPEHQKDVLEWVSCVHKKFLVLCYLHDVKNILQLHDLDSGSHLKTFFPL-  
 86144914 NGKVVSFDTRD-----GKWLEI IPEKPQLD---ISTGGGYLFAHYMVDVVSKEIQLDY-QGNLVREIHLPL  
 84386759 NGKVVSFDTSS-----QQWLDI IPEKPQLD---ISTGGGYLFAHYMVDVVSKEIQLDY-QGNLVREIHLPL  
 63100723 QYRLINIDFTQPSV-----SQWKEIIPQHDKDVIVFATCTFSSFLFVCFVLDVKNVLMKMFHLSGSEEIRTFPL-  
 38649021 NYKRLINIDFNNPEE-----SNWKVLVPEHEKDVLEWVSCVHKKYLVLCCLHVDVKNVQLHDLASGSHLKTFFPL-  
 59711729 NGKVVSYDVVT-----GEWTDI IPEQPQLD---ISVGGGTLFATYMDVLDVLSQVKQYDF-SGNLLREIELP  
 6755152 NYRLINIDFTDPDE-----SKWKVLVPEHEKDVLEWVACVRSNFLVLCYLHDVKNILQLHDLTTGALLKTFFPL-  
 74215349 NYRLINIDFTDPDE-----SKWKVLVPEHEKDVLEWVACVRSNFLVLCYLHDVKNILQLHDLTTGALLKTFFPL-  
 50514023 NYRLINIDFTDPEE-----SKWKVLVPEHEKDVLEWVACVRSNFLVLCYLHDVKNILQLHDLATGALLKIFPL-  
 26345256 NYRLINIDFTDPDE-----SKWKVLVPEHEKDVLEWVACVRSNFLVLCYLHDVKNILQLHDLTTGALLKTFFPL-  
 157879458 NYRLINIDFTDPEE-----SKWKVLVPEHEKDVLEWVACVRSNFLVLCYLHDVKNILQLHDLATGALLKIFPL-  
 51592147 NYRLINIDFTDPEE-----SKWKVLVPEHEKDVLEWVACVRSNFLVLCYLHDVKNILQLHDLATGALLKIFPL-  
 10835490 NYRLINIDFTDPEE-----SKWKVLVPEHEKDVLEWVACVRSNFLVLCYLHDVKNILQLHDLATGALLKIFPL-  
 50514022 NYRLINIDFTDPEE-----SKWKVLVPEHEKDVLEWVACVRSNFLVLCYLHDVKNILQLHDLATGALLKIFPL-  
 37928243 NYRLINIDFTDPEE-----SKWKVLVPEHEKDVLEWVACVRSNFLVLCYLHDVKNILQLHDLATGALLKIFPL-  
 27065055 NYRLINIDFTDPEE-----SKWKVLVPEHEKDVLEWVACVRSNFLVLCYLHDVKNILQLHDLATGALLKIFPL-  
 5103285 NYRLINIDFTDPEE-----SRWKVLVPEHEKDVLEWVACVRSNFLVLCYLHVDVKNILQLHDMATGALLKTFFPL-

13786144 NYRLINIDFTDPDE-----SKWKVLVPEHEKDVLEWVACVRSNFLVLCYLRNVKNILQLHDLTTGALLKTFPL-  
 5107662 NYRLINIDFTDPEE-----SKWKVLVPEHEKDVLEWVACVRSNFLVLCYLDVKNITLQLHDLATGALLKIFPL-  
 79382269 KYKLVVRVDLKEPN-----SWTDVVEEHEKDVLASACAVNGNHLVACYMSDVKHILQIRDLKSGSLLHQPL-  
 27066372 NYRLINIDFTDPEE-----SKWKVLVPEHEKDVLEWVACVRSNFLVLCYLDVKNITLQLHDLATGALLKIFPL-  
 19347837 KYKLVVRVDLKEPN-----SWTDVVEEHEKDVLASACAVNGNHLVACYMSDVKHILQIRDLKSGSLLHQPL-  
 109072195 NYRVINIDFRDPEE-----SKWKVLVPEHEKDVLEWVACVRSNFLVLCYLDVKNILQLHDLTTGALLKTFPL-  
 11691900 NYRVINIDFRDPEE-----SKWKVLVPEHEKDVLEWVACVRSNFLVLCYLDVKNILQLHDLTTGALLKTFPL-  
 41349456 NYRVINIDFRDPEE-----SKWKVLVPEHEKDVLEWVACVRSNFLVLCYLDVKNILQLHDLTTGALLKTFPL-  
 558596 NYRVINIDFWDPEE-----SKWKVLVPEHEKDVLEWVACVRSNFLVLCYLDVKNILQLHDLTTGALLKTFPL-  
 53127346 NYRLINIDFSDPEE-----SKWKVLIPEHERDVLEWVACVRSNFLVLCYLDVKNILQLHDLATGAHLKTFPL-  
 904214 NYRVINIDFRDPEE-----SKWKVLVPEHEKDVLEWVACVRSNFLVLCYLDVKNILQLHDLTTGALLKTFPL-  
 15217929 KYKVVVRVDLKEPS-----SWTDVIAEHEKDVLSASAVNGDQLVVSYSMSDVKHILQIRDLKSGSLLHGLPV-  
 9558588 KYKVVVRVDLKEPS-----SWTDVIAEHEKDVLSASAVNGDQLVVSYSMSDVKHILQIRDLKSGSLLHGLPV-  
 38345850 KYKLSRIDVNEPH-----SWMDILPEDEKAVLESACAVHGDKLLVNYLSDVKYVQLMRSVLTGELLHDIPI-  
 91082735 NYRIVIIDFDNPKE-----SEWKDLISEHPKDVLDWAHAHNENMLVVCYLQDVKNIMQLYDIKSSNKLHDFKL-  
 54650756 NYQVIAIDFNNSAE-----DKWETLIAEHKSDVLDWVKCVNDKLLVCYIRDVKSVLQVNSLKDGTLLREFDL-  
 73973662 NYRLINIDFTDPEE-----SKWKVLVPEHEKDVLEWVACVRSNFLVLCYLDVKNILQLHDLATGALLKTFPL-  
 73973660 NYRLINIDFTDPEE-----SKWKVLVPEHEKDVLEWVACVRSNFLVLCYLDVKNILQLHDLATGALLKTFPL-  
 47222200 RYRLINIDIQKPER-----QHWTIIPQHDKDVMGFVSCVNRHLLVNYLHDVKDILQVCELSTGRRLRDLPL-  
 73973664 NYRLINIDFTDPEE-----SKWKVLVPEHEKDVLEWVACVRSNFLVLCYLDVKNILQLHDLATGALLKTFPL-  
 55235507 NYRIVNIDFEQPEM-----EHWKTIVPEHPKNVLDWTTTCVNKDRIVLGYIDDVKSLLVVHSLADGSFVSKFPL-  
 73973658 NYRLINIDFTDPEE-----SKWKVLVPEHEKDVLEWVACVRSNFLVLCYLDVKNILQLHDLATGALLKTFPL-  
 71666762 RKKIVSIDIHTGQ-----ETVIVEQQRSVLSQAALVKN-TLLLAYLEDVKDVFYFCRLEDPT-LNAIPL-  
 49523575 RKKIISVDIATGK-----EQIVVGEREAVLDHAALVKN-TLILVYLEDVKSTLYYCCLDKPE-LKKITI-  
 71747962 RKKIISVDIATGK-----EQIVVGEREAVLDHAALVKN-TLILVYLEDVKSTLYYCCLDKPE-LKKITI-  
 33317309 RKKIVSIDIHTGQ-----ETVIVEQQRSVLSQAALVKN-TLLLAYLEDVKDVFYFCRLEDPT-LNAIPL-  
 47224662 RYRLINIDFACPDV-----SSWKEILLPQHDKDVI-----A-----  
 15291259 NYQVIAIDFNNSAE-----DKWETLIAEHKSDVLDWVKCVNDKLLVCYIRDVKSVLQVNSLKDGTLLREFDL-  
 73973656 NYRLINIDFTDPEE-----SKWKVLVPEHEKDVLEWVACVRSNFLVLCYLDVKNILQLHDLATGALLKTFPL-

Prim.cons. NYRVVNIIDFTNPEEPSLVRGE2K2Q3DNVDEPADRSKWKDLIPEHEKDLLEWVACVIRGNFLVACYLHDVKSILQLHDLATGALLREFPLP

550 560 570 580 590 600 610 620 630

|           |                                                                                           |
|-----------|-------------------------------------------------------------------------------------------|
| 62738741  | GIGSASGLSGRPGDRHAYLSFSSFTQPATV LALDP-ATAKT-----TPWEPVHLIT---FDPADFRVEQVFYPSKDGTKVPMFIVRRK |
| 87200538  | GIGSIGGVVGEPPGDPQGHFAFSGFTQPATIYAFDAGDAASA-----KVWAAPKLT---FDPARFETRQVFYPSKDGTRIPMFVVRK   |
| 103487461 | DIGAASGFGGKSSDPETFYAFSSFARPTTIYRFDT-ETGNS-----EIFAEPRLT---FNPADFVEQRFYPSKDGTEVPMFLVMKK    |
| 87200537  | GIGTASGFGGRPGDTETFYQFTSFNMPPAVYRMDL-RTGAV-----TPFAVPRMA---FDPADYDVEQRQFTSKDGTKVPIYIVRKR   |
| 94496227  | GFGTAAGFGGRSGDPETFFSFGSVTPASIYRFDT-ATRQF-----QLFAQPDLP---FDPNDYGIEQRLYPSKDGTMIPILITLRRK   |
| 35211243  | GLGTVTGFGGKRTDTETFYAFTSFTTPTTIYRYDI-PTAKS-----TVLRFQPKVD---FDPTAYTTEQVFFNSKDGTRIPMFIITYKK |
| 32448009  | GKGSVGGGLGGRQDAKETFFSFTNYVTPPSIHRVDV-ATGKS-----ELAIMPEVA---FDVSQYVTEQVFCTSKDGTKVPIITRHK   |
| 75906687  | GLGAVDGFGGKRGDTETFYKFTSFTTTPGTIYRYNL-VTGKS-----EVFRETIVD---FNPNDYETKQVFYQSQDGTQVPMFIITHKK |
| 35211187  | GIGSAGGFGGKRTDTETFYAFTSFTTPTTIYRYDI-PTAKS-----TVLRFQPKVD---FDPTAYTTEQVFFNSKDGTRIPMFIITYKK |
| 67921530  | GIGSVGGFDGKKEDTETFYFTSFTTTPSTVYRYDM-ITGES-----EIFCQPNVD---FNPHNYEIKQVFYPSKDGTRIPMFIITHKK  |
| 67930945  | GLGTAIWSPARVKDKEMFYGFMTYLAPTTMYRLDV-ETGRS-----EVARPVKLP---FDPSGFETTQVFYPSKDGSRIPMFLTRRK   |
| 17131625  | GLGAVGGFGGKRDDTETFYKFTSFTTTPGTIYRYNL-VTGKS-----EVFRETIVD---FNPNDYETKQVFYQSQDGTQVPMFIITHKK |
| 86609965  | GLGSASGFGGKRYDTETFYFTSFTTTPPTIYRYDF-TSGTS-----TLFRQPQVD---FDPQAYEVQVFYTSKDGTRIPMFLVHRR    |
| 83859556  | GLGVASGFGGDPQRSETFYYSYESLNQPATLYRYDV-ETGES-----EVFRAPELT---FNPDDYVVSQTFYESTGGARIPMFVAHHR  |
| 28808634  | DIGSAYGFSGKKDETEVYYSFTNYKMPSTTYRLNI-KDGDS-----EVYYSKAP---FDPALYDSRQVFYTSKDGTKVPMIITYKK    |
| 75854458  | DIGSAYGFSGKKEETEVEYYSFTNYKMPSTTYRLNI-KGGDS-----EVYYSKAP---FDPALYDSRQVFYTSKDGTKVPMIITYKK   |
| 86607173  | GLGSASGFGGKRHDTETFYFTSFTTTPPTIYRYDF-TSGRS-----TLFRQPQVD---FDPQAYEVQVFYASQDGTTRIPMFLVHRR   |
| 23128197  | GLGSAGGFGGKRHDTETFYSYTSFTTTPGTIYRYDM-ITGKS-----TVFRQPEVD---FNPNDYETKQIFYQSKDGTRVPMFIITHKK |
| 91226380  | DIGSAYGFSGKKEETEVEYYSFTNYKMPSTTYRLNI-KDGDS-----EVYYSKAP---FDPVLYESRQVFYTSKDGTKVPMIITYKK   |
| 88711708  | GVGSASGFGGKKEDKEFYFSFTNYNTPGSSYKYNV-ESGEY-----EQYWKPDID---FNPNDYESHQVFYNSKDGTKIPMIITHKK   |
| 110167745 | GIGSVVGFYGRRHDTSTFYYSVFSFTTTPSTIYHYDM-VSGES-----KIYRQSNVD---FNPNQFETKQVFYSKDGTSIPMFIITHKK |
| 109899092 | GVGTASGF DGKKDQQLYYSTNYKTPSTIFSLNV-ESGES-----SVYLKSKAN---FSDSAYESKQVFYTSKDGTKVPMIITHKK    |
| 86144168  | GIGSAGGF GAKKEDKELYYSFTNYTSPGSIKYDI-ESGTS-----ELFRKPAIN---FDPENYESKQVFYTSKDGTKVPMIITFKK   |
| 4973227   | GLGSVSGFNKGHDDPALYFGFENYAQPPTLYRFEP-KSGAI-----SLYRASAAAP---FKPEDYVSEQRFYQSKDGTRVPLIISYRK  |
| 6048357   | GLGSVSGFNKGHDDPALYFGFENYAQPPTLYRFEP-KSGAI-----SLYASAAAP---FKPEDYVSEQRFYQSKDGTRVPLIISYRK   |
| 76875127  | GVGTAGGFSGKKEQTTLYYSFTNYKTPGTTYTFDV-TTGES-----GVYRKSGVD---FNSDDYTSEQVFYNSKDGTKVPMIITYKN   |
| 216201    | GLGSVSGFNKGQDDPALYFGFENYAQPPTLYKFEP-NSGAI-----SLYRASAAAP---FKPEDYVSEQRFYRSKDGTRVPLIISYRK  |
| 88804657  | GVGSASGFGGKKEEKEFYFTNYNTPGSSYKYNV-ETGEY-----ELYWKPDID---FNPDDYVSNQVFYESADGTTRIPMIITHKK    |
| 89517967  | GIGNVGGF GAKEKDKTLYYSFTNYTTPGSTYLYDI-ATGES-----KLYRKPEIQ---FNSDEYESKQIFYTSKDGTKIPMIISHKK  |
| 90588230  | AVGTAGGF GAKKEEKILYYSTNYTTPGSIFSFEP-KSGKS-----EIYQKPKVD---FKSEYYESKQVFYTSKDGTKVPMIITYKK   |
| 71143549  | GVGSASALEGDKDESTLYYSFSNYKTPGTIYSYNI-DKGNS-----DVYRKSGAK---FSDSAYESKQVFYPSKDGTKVPMIITYKK   |
| 83855898  | GVGTVGGF GAKKEDKELYFSFTNYVTPGSIKYDI-EDGNS-----ELYVKPEID---FNPDPHYKSEQVFFNSKDGTKIPMIITYKK  |
| 85710915  | GVGSAGGFGGKDDAETLYYSFTNYSTPQTIYALNP-DTGES-----TVYEESEGAD---FDSSNYESKQVFYTSKDGTVPMIITYKK   |
| 78368715  | GKKGKIAGPYGKRNDYFYFTFNSYVQPQTTYKDFD-KTGES-----SLYAKPKVA---FNPNDYVSEQVFYTSKDGTRVPMIISYKK   |
| 56178266  | GVGSIGGFSGKKEADELYYFTNYSTPSTIYKFDP-DQGS-----EVYAESGAD---FDSANYESKQVFYTSKDGTEVPMIITYKK     |

91215481 VGGSVGGFGGKKEAKDIYFSFTNYTTPGTIYKFTP-ENGTY-----VVYQKPDID---FDTEAYESKQVFYPSKDGTKIPMIITHKK  
 78688320 GKGNVAGPFGKASKDYFYVFNFSYIQPETTYKDFD-KTAES-----TVVAKPQVS---FNPDDYVSEQVFYTSKDGTRVPMMSYKK  
 24374294 GKGNVAGPFGKASKDYFYVFNFSYIQPETTYKDFD-KTAES-----TVVAKPQVS---FNPDNVSEQVFYTSKDGTRVPMMSYKK  
 456523 GSGNASGFGEKTEKDLYYSTNYITPPTIFKYNV-TTGNS-----EVYQKPKVK---FNPENYVSEQVFYTSKDGTKIPMMSYKK  
 77816782 GLGNVTGPFKASKDYFYVFNFSYIQPETTYKDFD-KTGG-----TVIAKPKVS---FNPDNYISEQVFYTSKDGTRVPMMSYKK  
 68547790 GKGIAGPYGKASKPYFYVFNFSYVQPQTIIKYDL-NKGTN-----EVFSAPKVS---FNPDDYVSEQVFYTSKDGTRIPMLVSYKK  
 82744257 GLGNVTGPFKASKDYFYVFNFSYIQPETTYKDFD-KTGG-----TVIAKPKVS---FNPDNYISEQVFYTSKDGTRVPMMSYKK  
 86131249 VGGSVGGFGAEKDEKELYFSFNKTPGSIKYDI-ASGTS-----ELFIKPDID---FDPEAYESKQVFYNSKDGTKVPMIITYKK  
 88796133 DIGSVNGFYGDEADTTFYKLTGFTNPGQVYAYDV-QSGES-----TLFKRIDTG---INYDDYVTKQVFYTSKDGTKVPMFIVHKK  
 42526704 ANGSISFSGRKNEDSLFFNFSTSYTTPNKIIRYDI-KTNSL-----TDFVPAIP---INTGDFKCEQVFFKSKDGTKIPMHIVSKK  
 27367204 GEGTATGLEGKKSQTTLYYFTNYVTPPTIFSLDV-NSGES-----QVFQESKAP---FDRSQFESQVVFYPSKDGTLIPMIISYKK  
 37676919 GEGTATGLEGKKSQTTLYYFTNYVTPPTIFSLDV-NSGES-----QVFQESKAP---FDRHQYESQVVFYPSKDGTLIPMIISYKK  
 7585979 GEGTAYGLAGKKEETTLYYFTNYVTPPTIFSLDV-ESGES-----TLFQESKAP---FDRSEYESKQVFYTSKDGTVPMIISYKK  
 28809898 GEGTAYGLAGKKEETTLYYFTNYVTPPTIFSLDV-ESGAS-----TLYQESKAP---FDRNEYESKQVFYTSKDGTVPMIISYKK  
 6460324 ALGTVS-VSAEQDSSEVFVAFTSFLVPSRPYRLKL-PGGEL-----EPLADPALD---FDAATYEVTEFAMSKDGTRVPMFIVARK  
 91223249 GEGTAYGLAGKKEETTLYYFTNYVTPPTIFSLDV-ESGES-----TLFQESKAP---FDRNEYESKQVFYTSKDGTVPMIISYKK  
 56180108 GIGSISGFEGSHKAPDVVFFSFKSFTEPGKIYRYQP-DQORT-----TLWYETKVP---AELDQYTTEQVVYNSADGTEVPMFLVHDK  
 55769741 EIGSVSEISCRREDMDVFIGFTSFLSPGIIYRCNLTSAIPE-----MKIFREISVP---GFDRTNFEVKQIFVNSKDGTKIPMIFMSKR  
 47507507 NVGSIVGYSGQKKDSEIFYQFTSFLSPGIVFHCDLTKEELN-----PTVYREVSVK---GFDPSDYQTIQVFYPSKDGTMIPMIVHKK  
 28502989 NVGSIVGYSGQKKDSEIFYQFTSFLSPGIVFHCDLTKEELN-----PTVYREVSVK---GFDPSDYQTIQVFYPSKDGTMIPMIVHKK  
 86144914 GLGTASGLGGKNEQTQLYYFTNYVTPPTIFSLDV-ESGSS-----EIYQRSESP---FESDQFESKQVSYTSKDGTKVPMIISYKK  
 84386759 SLGTASGLGGKNEQTQLHYFTNYVTPPTIFSLDV-ESGSS-----EIYQRSESP---FESDQFESKQVFYTSKDGTVPMIISYKK  
 63100723 DVGSIVGFTGRKKDSEIFYSFTSFLSPAIIYHCDLTMEPLQ-----PHVFREVTVK---GFNPADYQTTQVFYPSKDGTVPMFIVHKK  
 38649021 DVGSVVGYSGQKKDSEIFYQFTSFLSPGIIYHCDLTKEELK-----PTVFREVSVK---GFDPSDYQTVQVFYPSKDGTMIPMIVHKK  
 59711729 GEGQATGFSGKREQTDLFFFTNYVTPPTIYQFDV-KTGET-----ELYLASASP---FDSEKFESEKQVFYTSKDGTVPMIISYRK  
 6755152 DVGSVVGYSGRKKDSEIFYQFTSFLSPGVIYHCDLTKEELE-----PMVFREVTVK---GIDAADYQTIQIFYPSKDGTKIPMIVHKK  
 74215349 DVGSVVGYSGRKKDSEIFYQFTSFLSPGVIYHCDLTKEELE-----PMVFREVTVK---GIDAADYQTIQIFYPSKDGTKIPMIVHKK  
 50514023 EVGSVVGYSGQKKDTEIFYQFTSFLSPGIIYHCDLTKEELE-----PRVFREVTVK---GIDASDYQTVQIFYPSKDGTKIPMIVHKK  
 26345256 DVGSVVGYSGRKKDSEIFYQFTSFLSPGVIYHCDLTKEELE-----PMVFREVTVK---GIDAADYQTIQIFYPSKDGTKIPMIVHKK  
 157879458 EVGSVVGYSGQKKDTEIFYQFTSFLSPGIIYHCDLTKEELE-----PRVFREVTVK---GIDASDYQTVQIFYPSKDGTKIPMIVHKK  
 51592147 EVGSVVGYSGQKKDTEIFYQFTSFLSPGIIYHCDLTKEELE-----PRVFREVTVK---GIDASDYQTVQIFYPSKDGTKIPMIVHKK  
 10835490 EVGSVVGYSGQKKDTEIFYCFTSFLSPGIIYHCDLTKEELE-----PRVFREVTVK---GIDASDYQTVQIFYPSKDGTKIPMIVHKK  
 50514022 EVGSVVGYSGQKKDTEIFYQFTSFLSPGIIYHCDLTKEELE-----PRVFREVTCK---GIDASDYQTVQIFYPSKDGTKIPMIVHKK  
 37928243 EVGSVVGYSGQKKDTEIFYQFTSFLSPGIIYHCDLTKEELE-----PRVFREVTVK---GIDASDYQTVQIFYPSKDGTKIPMIVHKK  
 27065055 EVGSVVGYSGQKKDTEIFYQFTSFLSPGIIYHCDLTKEELE-----PRVFREVTVK---GIDASDYQTVQIFYPSKDGTKIPMIVHKK  
 5103285 EVGSVVGYSGQKKDTEIFYQFTSFLSPGIIYHCDLTKEELE-----PRVFREVTVK---GIDASDYQTVQIFYPSKDGTKIPMIVHKK

13786144 DVGSVVGYSGRKKDSEIFYQFTSFLSPGVIYHCDLTREELE-----PRVFREVTVK--GIDASDYQTIQVFYPSKDGTKIPMFIVHKK  
 5107662 EVGSVVGYSGQKKDTEIFYQFTSFLSPGIIYHCDLTKEELE-----PRVFREVTVK--GIDASDYQTVQIFYPSKDGTKIPMFIVHKK  
 79382269 DIGSVSDVSARRKDNTFFFSTFLTPGVIYKCDLANESPE-----VKVFREVTVP--GFDREAFQAIQVFYPSKDGTKIPMFIVAKK  
 27066372 EVGSVVGYSGQKKDTEIFYQFTSFLSPGIIYHCDLTKEELE-----PRVFREVTVK--GIDASDYQTVQIFYPSKDGTKIPMFIVHKK  
 19347837 DIGSVSDVSARRKDNTFFFSTFLTPGVIYKCDLANESPE-----VKVFREVTVP--GFDREAFQAIQVFYPSKDGTKIPMFIVAKK  
 109072195 EVGSIVGYSGQKKDTEIFYQFTSFLSPGIIYHCDLTKEELE-----PRVFREVTVK--GIDASDYQTVQIFYPSKDGTKIPMFIVHKK  
 11691900 DVGSIVGYSGQKKDTEIFYQFTSFLSPGIIYHCDLTKEELE-----PRVFREVTVK--GIDASDYQTVQIFYPSKDGTKIPMFIVHKK  
 41349456 DVGSIVGYSGQKKDTEIFYQFTSFLSPGIIYHCDLTKEELE-----PRVFREVTVK--GIDASDYQTVQIFYPSKDGTKIPMFIVHKK  
 558596 DVGSIVGYSGQKKDTEIFYQFTSFLSPGIIYHCDLTKEELE-----PRVFREVTVK--GIDASDYQTVQIFYPSKDGTKIPMFIVHKK  
 53127346 DVGSIVGYSGQKKDNEIFYQFTSFLSPGIIYHCDLTKEELE-----PRVFREVTVK--GFDPSVYQTIQVFYPSKDGTKIPMFIHKK  
 904214 DVGSIVGYSGQKKDTEIFYQFTSFLSPGIIYHCDLTKEELE-----PRVFREVTVK--GIDASDYQTVQLFYPSKDGTKIPMFIVHKK  
 15217929 DIGSVCGVFARRKDTTFFFRFTSFLTPGVIYICDLSHEAPE-----VTVFREIGVP--GFDRTAFQVTQVFYPSKDGTDIPMFIVARK  
 9558588 DIGSVCGVFARRKDTTFFFRFTSFLTPGVIYICDLSHEAPE-----VTVFREIGVP--GFDRTAFQVTQVFYPSKDGTDIPMFIVARK  
 38345850 DIGSVNGISGRRDNSEVFI EFASFLTPGIIYRCDVSKETPE-----MNIYREISVG--GFDRTDFEAKQVFYPSKDGTKIPMFIVSKK  
 91082735 DVGTISAIISGKKYHKEMFFSFCFLTPNIIYKVDFDQGSIK-----ETLFHETKVG--DFESSKYETKQVFYPSKDGTEIPMFI INKK  
 54650756 DIGTIVGTSGEKKYSEIFYNFSSFLNPGSIYRYDFKTPDKS-----PSVFREIKLNLEGFRREDYAVEQIFYPSKDGTKVPMFIRKK  
 73973662 EVGSIVGYSGQKKDTEIFYQFTSFLSPGIIYHCDLTKEELE-----PRVFREVTVK--GIDASDYQTVQIFYPSKDGTKIPMFIVHKK  
 73973660 EVGSIVGYSGQKKDTEIFYQFTSFLSPGIIYHCDLTKEELE-----PRVFREVTVK--GIDASDYQTVQIFYPSKDGTKIPMFIVHKK  
 47222200 KVGTVCGVSCKKKHSEFFYKFTSFTTPAIIYHCDLSELNPE-----PKVFREVEVK--GVKQEDFQTNQVFYASKDGTKIPMFLVHSQ  
 73973664 EVGSIVGYSGQKKDTEIFYQFTSFLSPGIIYHCDLTKEELE-----PRVFREVTVK--GIDASDYQTVQIFYPSKDGTKIPMFIVHKK  
 55235507 EIGTVAGFSGKKKYSEIFYHFVSFLTPGIIYHYDFEGKTEAAGGGAMEPTVFREVKI--EDFDNSRYAVEQIFYPSKDGTEKVPMFIVQRK  
 73973658 EVGSIVGYSGQKKDTEIFYQFTSFLSPGIIYHCDLTKEELE-----PRVFREVTVK--GIDASDYQTVQIFYPSKDGTKIPMFIVHKK  
 71666762 PIGTITISFFSDRKKDFVSKITISFLLPGRSFFLDINDPQSS-----LRVFKDDTVE--GLLVDDFVTEQTFYNSDGVRIPMFIVYRK  
 49523575 PIGAISSLFADRKVDLVSFKVTSFLLPGRSFVLDINDPEGS-----LRVFKDDNIE--GLSADDFITEQKIFYNSADGTRIPMFI IHRK  
 71747962 PIGAISSLFADRKVDLVSFKVTSFLLPGRSFVLDINDPEGS-----LRVFKDDNIE--GLSADDFITEQKIFYNSADGTRIPMFI IHRK  
 33317309 PIGTITISFFSDRKKDFVSKITISFLLPGRSFFLDINDPQSS-----LRVFKDDTVE--GLLVDDFVTEQTFYNSDGVRIPMFIVYRK  
 47224662 -----IIYHCDLTKEEPLQ-----PHIFREVTVK--GFNPSDYQTTQIFYPSKDGTKIPMFIVHKK  
 15291259 DIGTIVGTSGEKKYSEIFYNFSSFLNPGSIYRYDFKTPDKS-----PSVFREIKLNLEGFRREDYAVEQIFYPSKDGTKVPMFIRKK  
 73973656 -----G-----IIYHCDLTKEELE-----PRVFREVTVK--GIDASDYQTVQIFYPSKDGTKIPMFIVHKK

Prim.cons. GVGSVVGFSGKKKDTEIFY2FTSFLTPGTIIYHCDLTKEGLSAGGGAMEPRVFREVTVKLEGFDPDSDYQTEQVFYPSKDGTKIPMFIVHKK

640 650 660 670 680 690 700 710 720

|           |                                                                          |
|-----------|--------------------------------------------------------------------------|
| 62738741  | DAKG---PLPTLLYGYGGFNVALTPWF-----SAGFMTWID-SGGAFALANLRGGGEYGDAWHDAGRRDCK  |
| 87200538  | DLAG---PLPTILYGYGGFNISVLPWF-----SAGRMAWLD-AGGAFAVANIRGGGEYGEAWHLAGKGPCK  |
| 103487461 | GLDRS-KGSPTLLYGYGGFNVSILTPGF-----SPTRLAWVD-KGGVLAIANLRGGGEYGKAWHDAGRLANK |
| 87200537  | VLAAADKPLPTLLYGYGGFDISLTPAY-----SPVRMAWLE-AGGAFALANIRGGGEYGRSWEYAGRRENK  |
| 94496227  | ALADSATAAPTILYGYGGFNISLTPGY-----SATRMAWLE-QGGVYAIANLRGGGEYGRAWHDAARGANK  |
| 35211243  | GTPRN-ALNPTYLYGYGGFNVSITPTF-----SPANLLWLE-MGGLYAVPNLRGGGEYGEDWHQAGTRLNK  |
| 32448009  | DAPMD-GSNRTLAYGGFNISLTPSY-----SPGIAGWLD-AGGVYAVANLRGGGEYGREWHEAGMQLKK    |
| 75906687  | GIQLD-GNNPTYLYAYGGFNVSILTPNF-----SVSMLVWME-MGGVYAMPNIRGGGEYGEWQHAGMKDKK  |
| 35211187  | GTPRN-ALNPTYLYGYGGFNVSITPTF-----SPSNLLWLE-MGGLYAVPNLRGGGEYGEDWHQAGTRLNK  |
| 67921530  | GLKID-GNNPTYLYAYGGFNVSILTPNF-----SISNLVWME-MGGVYAVPNLRGGGEYGEWQHAGMKDKK  |
| 67930945  | GLKLD-GRNPALLYGYGGFDVNPNTPAF-----SPTVAEWIR-MGGVFASACLRGGSEYGEWQHAGMRACK  |
| 17131625  | GIQLN-GNNPTYLYAYGGFNVSILTPSF-----SVSMLVWME-MGGVYAMPNIRGGGEYGEWQHAGMKDKK  |
| 86609965  | GLTRT-GDHPTLLYGYGGFGISLTPSF-----SVGLVAWLE-MGGVYAQPNIIRGGGEYGEWQHAGTKLNK  |
| 83859556  | DVDPN-GVRPTLIYGYGGFAITRRPDF-----DVRRLQWME-MGGVYAIANLRGGSAYGRDWHDAAGRLANK |
| 28808634  | GTPMD-GCAPTILYGYGGFNISLTPSF-----NPTRAAWLE-LGGVYAVANIRGGGEYGKEWHNAGIQMQK  |
| 75854458  | GTPMD-GSAPTILYGYGGFNISLTPSF-----SPTRAAWLE-LGGVYAVANIRGGGEYGKEWHNAGIQMQK  |
| 86607173  | GLART-GDHPTLLYGYGGFGISLTPSF-----SVGLVAWLE-MGGVYAQPNIIRGGGEYGEAWHQAGTKLNK |
| 23128197  | GIKLD-GNNPTYLYAYGGFNVSMTPSF-----SVSLLVWME-MGGVYAMPNIRGGGEYGEWQHAGMKDKK   |
| 91226380  | GAPMD-GSAPTILYGYGGFNISLTPSF-----SPTRAAWLE-LGGVYAVANIRGGGEYGKEWHNAGIQMQK  |
| 88711708  | GLELN-GENPTILYGYGGFNISLTPSF-----SIGNAVWME-QGGIYAVPNLRGGGEYGKKWHDAGTKTKK  |
| 110167745 | GVKLD-GNNPTILYGYGGFNISLTPNF-----SISRLIWLE-MGGVYAVPNIRGGGEYGEWQHAGIKQQK   |
| 109899092 | GLKLD-GTNPTMLYGYGGFNISLQPAF-----SSVNAAWLE-QGGVYAVPNLRGGGEYGKAWHDAGTKLQK  |
| 86144168  | GLERN-GKNPTILYGYGGFNISLTPSF-----SITNAIWME-MGGVYAVPNLRGGGEYGKEWHDAGTKMQK  |
| 4973227   | GLKLD-GSNPTILYGYGGFDVSLTPSF-----SVSVANWLD-LGGVYAVANLRGGGEYQAWHLAGTQQNK   |
| 6048357   | GLKLD-GSNPTILYGYGGFDVSLTPSF-----SVSVANWLD-LGGVYAVANLRGGGEYQAWHLAGTQQNK   |
| 76875127  | GIKLD-GSNPTILYGYGGFNISLTPSF-----SPTTAAWLE-QGGVYAVANIRGGGEYGKEWHNAGTKLQK  |
| 216201    | GLKLD-GSNPTILYGYGGFDVSLTPSF-----SVSVANWLD-LGGVYAVANLRGGGEYQAWHLAGTRMCK   |
| 88804657  | GLEKN-GDNPTILYGYGGFNVSILTPGF-----STSNVWLE-QGGIYAVPNIRGGGEYGKKWHDAGTKTSK  |
| 89517967  | GLVLD-GKNPTILYGYGGFNVSILNPSF-----SVSRAAWME-MGGIYAVANLRGGGEYGKKWHDAGTKMQK |
| 90588230  | GTKLD-GKNPTILYGYGGFNISLTPSF-----SIANAVWME-NGGVYAVANLRGGGEYGKKWHDAGTKLQK  |
| 71143549  | GIELN-GKNPTILYGYGGFNISLTPRF-----SVSRAVWLE-QGGIYAVANLRGGGEYGKTWHKAGTQLDK  |
| 83855898  | GTELN-GKNPTILYGYGGFNISLTPSF-----SIANAVWME-QGGIYAVPNLRGGGEYGKAWHDAGTKLQK  |
| 85710915  | GTELD-GSNPTILYGYGGFNISLTPSF-----SIANAAWLE-MGGVYAVANLRGGGEYGKAWHDAGTKMQK  |
| 78368715  | GLTLN-GENPTLLYAYGGFSISLTPRF-----SPANIAWMD-MGGVYAVPNLRGGAEYGESWQHAGMFDCK  |
| 56178266  | GTKLD-GSNPTILYGYGGFNISLTPSF-----SIANAAWLE-MGGVYAVANLRGGGEYGKDWKAGTKMQK   |

91215481 GIELD-GTHPTMLYGYGGFNISLTPSF-----STANTVWLE-NGGVYAVANLRGGGEYGKEWHNAGIKMKK  
 78688320 GLVKN-GQNPTLLYAYGGFAISMTPRF-----SPANIAWLD-MGGIYAVPSLRGGADYGESWHQAGMFDKK  
 24374294 GLVRN-GQNPTLLYAYGGFAISMTPRF-----SPANIAWLD-MGGIYAVPSLRGGADYGESWHQAGMFDKK  
 456523 GLKKD-GKNPTILYSYGGFNISLQPAF-----SVVNAIWME-NGGIYAVPNIRGGGEYGKKWHDAGTKMQK  
 77816782 GLVKN-GQNPTLLYAYGGFAISMTPRF-----SPANIAWLD-MGGIYAVPSLRGGAEYGESWHQAGMFDKK  
 68547790 GLKKD-GKNPTLLYAYGGFSISMTPRF-----SPATIAWLD-MGGIYAVPALRGGSEYGEEWHKAGMFGKK  
 82744257 GLVKN-GQNPTLLYAYGGFAISMTPRF-----SPANIAWLD-MGGIYAVPSLRGGAEYGESWHQAGMFDKK  
 86131249 GTELN-GKNPTILYAYGGFNVSILTSPF-----SIANAVWME-QGGVYAVPNLRGGGEYGKKWHDAGTKMQK  
 88796133 GLKLD-GNNKTLYGYGGFNISLKPgy-----SVSRMVWVE-QGNVLAIANLRGGGEYGOQWHKAGTKLNK  
 42526704 DIKLD-GSNPTIMYGYGGFAISLPPAF-----SAARMAFLE-KGGIFACVNLRGGLEYGEAWHSAGKMKK  
 27367204 GIELN-GKNPTILYGYGGFDVSLTPAF-----SGMVASWLE-LGGVYAVANLRGGGEYKAWHNAGTQLQK  
 37676919 GIELN-GKNPTILYGYGGFDVSLTPAF-----SGMVASWLE-LGGVYAVANLRGGGEYKAWHNAGTQLQK  
 7585979 GIALD-GSAPTMLYGYGGFNISLTPMF-----SGNVANWLE-LGGIYAVANMRGGGEYKAWHNAGTQQQK  
 28809898 GISLD-GSAPTMLYGYGGFNISLTPMF-----SGNVANWLE-LGGIYAVANMRGGGEYKAWHNAGTQQQK  
 6460324 DAPRD-GSNRTL YGYGGFSISLTPAF-----SASRLAWLE-RGGVFVQANLRGGGEYGEAWHEAGTLGRK  
 91223249 GIALD-GRAPTMLYGYGGFNISLTPMF-----SGNVSNWLE-LGGIYAVANMRGGGEYKAWHNAGTQQQK  
 56180108 NIELN-GENPTLLYGYGGFNISITPDY-----DTTRLVWLE-MGGVLAIPNLRGGGEYFEMWHQGTOKENK  
 55769741 DIELDG-SHPTLLYGYGGFNISLTPSF-----SVSRVVLCKNMGFVVCVANI RGGGEYGEEWHKAGARAMK  
 47507507 GIALDN-SHPAFLYGYGGFNISITPSY-----SVSRLIFMRHLGGILAVANIRGGGEYGETWHKAGSLGNK  
 28502989 GIALDN-SHPAFLYGYGGFNISITPSY-----SVSRLIFMRHLGGILAVANIRGGGEYGETWHKAGSLGNK  
 86144914 GLVLD-GNNPTMLYAYGGFNVSILTSPF-----SGTVGSWLE-LGGVYAVPNLRGGGEYKAWHKAGTQQQK  
 84386759 GLVLD-GNNPTMLYAYGGFNVSILTSPF-----SGTVGSWLE-LGGVYAVPNLRGGGEYKAWHKAGTQQQK  
 63100723 GIKMDG-SHPAFLYGYGGFNISITPSY-----SVSRLIFIRHLGGVLAVANIRGGGEYGETWHKGMMLANK  
 38649021 GITLKD-SHPAFLYGYGGFNISITPSY-----SVSRLIFVRHLGGILAVANIRGGGEYGETWHKAGILGNK  
 59711729 GIELD-GSNPTILYGYGGFNVSILTPNF-----SGVMASWLE-LGGVYAIPNIRGGGEYKKEWHKAGTQQQK  
 6755152 GIKLDG-SHPAFLYGYGGFNISITPNY-----SVSRLIFVRHMGGVLAVANIRGGGEYGETWHKGGILANK  
 74215349 GIKLDG-SHPAFLYGYGGFNISITPNY-----SVSRLIFVRHMGGVLAVANIRGGGEYGETWHKGGILANK  
 50514023 GIKLDG-SHPAFLYGYGGFNISITPNY-----SVSRLIFVRHMGGVLAVANIRGGGEYGETWHKGGILANK  
 26345256 GIKLDG-SHPAFLYGYGGFNISITPNY-----SVSRLIFVRHMGGVLAVANIRGGGEYGETWHKGGILANK  
 157879458 GIKLDG-SHPAFLYGYGGFNISITPNY-----SVSRLIFVRHMGGVLAVANIRGGGEYGETWHKGGILANK  
 51592147 GIKLDG-SHPAFLYGYGGFNISITPNY-----SVSRLIFVRHMGGVLAVANIRGGGEYGETWHKGGILANK  
 10835490 GIKLDG-SHPAFLYGYGGFNISITPNY-----SVSRLIFVRHMGGVLAVANIRGGGEYGETWHKGGILANK  
 50514022 GIKLDG-SHPAFLYGYGGFNISITPNY-----SVSRLIFVRHMGGVLAVANIRGGGEYGETWHKGGILANK  
 37928243 GIKLDG-SHPAFLYGYGGFNISITPNY-----SVSRLIFVRHMGGVLAVANIRGGGEYGETWHKGGILANK  
 27065055 GIKLDG-SHPAFLYGFGGFNISITPNY-----SVSRLIFVRHMGGVLAVANIRGGGEYGETWHKGGILANK  
 5103285 GIKLDG-SHPAFLYGYGGFNISITPNY-----SVCRLIFVRHMGGVLAVANIRGGGEYGETWHKGGILANK

13786144 GIKLDG-SHPAFLYGYGGFNISITPNY-----SVSRLIFVRHMGGVLAVANIRGGGEYGETWHKGGILANK  
5107662 GIKLDG-SHPAFLYGYGGFNISITPNY-----SVSRLIFVRHMGGVLAVANIRGGGEYGETWHKGGILANK  
79382269 DIKLDG-SHPCLLYAYGGFNISITPSF-----SASRIVLSKHLGVVFCFANIRGGGEYGEETHKAGSLAKK  
27066372 GIKLDG-SHPAFLYGYGGFNISITPNY-----SVSRLIFVRHMGGVLAVANIRGGGEYGETWHKGGILANK  
19347837 DIKLDG-SHPCLLYAYGGFNISITPSF-----SASRIVLSKHLGVVFCFANIRGGGEYGEETHKAGSLAKK  
109072195 GIKLDG-SHPAFLYGYGGFNISITPNY-----SVSRLIFVRHMGGILAVANIRGGGEYGETWHKGGILANK  
11691900 SIKLDG-SHPAFLYGYGGFNISITPNY-----SVSRLIFVRHMGGILAVANIRGGGEYGETWHKGGILANK  
41349456 GIKLDG-SHPAFLYGYGGFNISITPNY-----SVSRLIFVRHMGGILAVANIRGGGEYGETWHKGGILANK  
558596 GIKLDG-SHPAFLYGYGGFNISITPNY-----SVSRLIFVRHMGGILAVANIRGGGEYGETWHKGGILANK  
53127346 GIKLDG-SHPAFLYGYGGFNISITPSY-----SVSRLIFVRHLLGGVLAVANIRGGGEYGETWHKGGILANK  
904214 SIKLDG-SHPAFLYGYGGFNISITPNY-----SVSRLIFVRHMGGILAVANIRGGGEYGETWHKGGILANK  
15217929 DIKLDG-SHPCLLYAYGGFSISMTPIFF-----SATRIVLGRHLGTVFCFANIRGGGEYGEETHKSGALANK  
9558588 DIKLDG-SHPCLLYAYGGFSISMTPIFF-----SATRIVLGRHLGTVFCFANIRGGGEYGEETHKSGALANK  
38345850 SIVLDG-SHPTLLYGYGGFGMNMTPHF-----SVTRIVLMRNLGFVSCIANIRGGGEYGEDWHKAGSLANK  
91082735 GLVNDG-SKPCLLYGYGGFNVNLTPIFF-----GVSRLVFIENFDGVYALANIRGGGEYGDNWHNGGRFGKK  
54650756 RDSVE--PRPCLLYGYGGFNISMLPSF-----GLSGLMFIIDTFDGVLAYPNLRGGGEYGEKWHNGGRLLNK  
73973662 GIKLDG-SHPAFLYGYGGFNISITPNY-----SVSRLIFVRHMGGVLAVANIRGGGEYGETWHKGGILANK  
73973660 GIKLDG-SHPAFLYGYGGFNISITPNY-----SVSRLIFVRHMGGVLAVANIRGGGEYGETWHKGGILANK  
47222200 GLKKDG-SHPVFLYGYGGFEASIQPYNHVLTQLTSSTFTGFDRSSWLPVT SVAYLLFVRHLGGILAVANIRGGGEYGLTWHKGGTLGNK  
73973664 GIKLDG-SHPAFLYGYGGFNISITPNY-----SVSRLIFVRHMGGVLAVANIRGGGEYGETWHKGGILANK  
55235507 QEKKE--HKPCLLYGYGGFNICVQPSF-----SITGLVFIIDTFDGVLAYPNLRGGGEYGERWHNAGRLLNK  
73973658 GIKLDG-SHPAFLYGYGGFNISITPNY-----SVSRLIFVRHMGGVLAVANIRGGGEYGETWHKGGILANK  
71666762 GSVSS--ESPLLLYGYGGFNIPLTPAF-----SSSRMVFLRDLGGVLAVPNIRGGGEYGEETHDAGRRVCK  
49523575 GIVTS--ESPVLLYGYGGFNISLTPSF-----SSSRVVFLOHLRGLAVPNIRGGGEYGEETHNAGRLTSK  
71747962 GIVTS--ESPVLLYGYGGFNISLTPSF-----SSSRVVFLOHLRGLAVPNIRGGGEYGEETHNAGRLTSK  
33317309 GSVSS--ESPLLLYGYGGFNIPLTPAF-----SSSRMVFLRDLGGVLAVLNIRGGGEYGEETHDAGRRACK  
47224662 GIELDG-SHPGFLYGYGGFNISITPSY-----SVSRLIFVCHLGGVLAVANIRGGGEYGETWHKAGMLANK  
15291259 RDSVE--PRPCLLYGYGGFNISMLPSF-----GLSGLMFIIDTFDGVLAYPNLRGGGEYGEKWHNGGRLLNK  
73973656 GIKLDG-SHPAFLYGYGGFNISITPNY-----SVSRLIFVRHMGGVLAVANIRGGGEYGETWHKGGILANK

:\*. :\*\*\* \* : . :\*\*\* :\* \* : \* \*

Prim.cons. GIKLDGGS2PT2LYGYGGFNISLTPSFNHVLTQLTSSTFTGFDRSSWLPVTSVSRILWLEHMGGVYAVANIRGGGEYGETWHKAGTLANK

730 740 750 760 770 780 790 800 810



62738741 QNVFDDF IAAGEWLIANGVTPRHGLAIEGGSNGGLLI GAVTNQRPD LFAAASP AVGVMDMLRF DQFTAG-RYWVDDYGYPEK-EADWRVL  
87200538 QNVFDDF IAAGEWLIKANGVTSANGLAVEGGSNGGLLVGAVVNQRPD LFAAASP AVGVMDMLRF DKFTAG-REWVFDYGYPEK-EEDWRRL  
103487461 QNVFDDF IAAGEYLIAEGITGKGQLAIEGGSNGGLLVGAVTNQRPD LFAAALP AVGVMDMLRF DRFTAG-RYWVDDYGYPSK-EADFRNL  
87200537 QNSFDDF IAAGEFLIREGIAGKGQLAIQGASNGGLLVGAVVNQRPD LFAAANPDVGVMDMLRF DRFTSG-RFWVDDYGRPDR-EEDWRTL  
94496227 QNVFDDF IAAAAYL KANGFTPPDGLAIEGRSNGGLLVGAVVNQRPD LFAAALP AVGVMDMLRF DRFTAG-RYWTDYGYSPAD-RRAFPLL  
35211243 QNVFDDF IAAAAYL IANKYTSPEKLAIEGGSNGGLLVGAAMTQRPELFAAALP AVGVMDMLRF EQFTIG-WAWVSDYGYSSQD-PEQFQAL  
32448009 QNVFDDF IAAAAYL IDMGLTSRERLGVRRGGSNGGLLVGAVMTQRPELFGAALP AVGVMDMLRFYHKFTIG-WAWVSEFGSSDD-ETQIDNL  
75906687 QNVFDDF IAAAAYL MANNYTKPEKLAIEGGSNGGLLVGACMTQRPELFGAALP AVGVMDMLRFYHKFTIG-WAWTAEYGYSPDN-PQEFPAI  
35211187 QNVFDDF IAAAAYL IANKYTSPEKLAIEGGSNGGLLVGAAMTQRPELFAAALP AVGVMDMLRF EQFTIG-WAWVSDYGYSSQD-PEQFQAL  
67921530 QNVFDDF IAAAAYL IKNNYTSQKLAIEGGSNGGLLVGAACLTQPKLYAAALP AVGVMDMLRFHQFTIG-WAWCPEYGSSEN-EEEFKTL  
67930945 QNVFDDF IAAAAYL VANRYTSTPKLAIEGGSNGGLLVGAVLNQRPELFGAALP AVGVMDMLRFHQFTIG-WAWCPEYGSSEN-EEEFKTL  
17131625 QNVFDDF IAAAAYL IANNYTKPEKLAIEGGSNGGLLVGACMTQRPELFGAALP AVGVMDMLRFYHKFTIG-WAWTAEYGYSPDN-PQEFPAL  
86609965 QKVFDDF IAAAAYL IAHGYNPAKLAISGGSNGGLLVGACLVQRPELFAAALP AVGVMDMLRFYHKFTIG-WAWISEYGYSPEN-PEEFKAL  
83859556 QNVFDDF INAGHALIDMGWTS PDHLAIHGRSNGGLLVGAVANQAPDLFAAALP AVGVMDMLRFNQFTAG-RFWVDDYGYSPQD-PEMFDVL  
28808634 QNVFDDF IAAAAYL IDEKVTSSNKLAIEGGSNGGLLVGAVMTQRPELFKVALP AVGVMDMLRFYHTFTAG-AGWAYDYGTAEQSKEMFYLL  
75854458 QNVFDDF IAAAAYL IDEKVTSSNKLAIEGGSNGGLLVGAVMTQRPELFKVALP AVGVMDMLRFYHTFTAG-AGWAYDYGTAEQSKEMFYLL  
86607173 QKVFDDF IAAAAYL MANGYTNPSKLAIEGGSNGGLLVGACLTQRPELFAAALP AVGVMDMLRFYHKFTIG-WAWISEYGYSPED-PEEFKAL  
23128197 QNVFDDF IGAAYL IANKYTKTEKLAIEGGSNGGLLVGACITQRPELFGAALP AVGVMDMLRFYHKFTIG-WAWTSEFGSADN-SEEFPAL  
91226380 QNVFDDF IAAAAYL IDEKVTSSNKLAIEGGSNGGLLVGAVMTQRPELFKVALP AVGVMDMLRFYHTFTAG-AGWAYDYGTAEQSKEMFYLL  
88711708 QNVFDDF IAAGEYL IANKYTSKDYLAIIRGGSNGGLLVGATMTQRPD LFKVALP AVGVMDMLRFYHTFTAG-AGWAYDYGTAESEEMFNYL  
110167745 QNVFDDF ISAAAYL IENNWSSPKLAIEGGSNGGLLVGACITQRPELFGAALP AVGVMDMLRFYHKFTIG-WAWTAEYGYSPDD-PEEFKAL  
109899092 QNVFDDF IAAAAYL IEQNYTSPDYLAIRGGSNGGLLVGATMTQRPELFKVALP AVGVMDMLRFYHTFTAG-AGWAYDYGTSEDSQEMFDYL  
86144168 QNVFDDF IAAAAYL ISENYTSSDYLAIRGGSNGGLLVGATMTQRPD LMKVALP AVGVMDMLRFYHTFTAG-AGWAYDYGTSEDSKEMFEYI  
4973227 QNVFDDF IAAAAYL KAEGYTRTDRLAIRGGSNGGLLVGAVMTQRPD LMRVALP AVGVMDMLRFYHTFTAG-AGWAYDYGTSEDSKEMFDYL  
6048357 QNVFDDF IAAAAYL KAEGYTRTDRLAIRGGSNGGLLVGAVMTQRPD LMRVALP AVGVMDMLRFYHTFTAG-AGWAYDYGTSEDSKEMFDYL  
76875127 QNVFDDF IAAAAYL QSKKYTSKQRLAIRGGSNGGLLVGAVMTQRPD LMQVALP AVGVMDMLRFYHTFTAG-AGWAYDYGTSEDSKEMFYYI  
216201 QNVFDDF IAAAAYL KAEGYTRTDRLAIRGGSNGGLLVGAVMTQRPD LMRVACQAVGVMDMLRFYHTFTAG-AGWAYDYGTSEDSKEMFYYI  
88804657 QNVFDDF IAAAAYL IAEGYTSAGKLAIRGGSNGGLLVGAVMTQRPD LMQVALP AVGVMDMLRFYHTFTAG-AGWSYDYGTSESEEMFEYLL  
89517967 QNVFDDF IAAGEWLKDNDYTSKYLAIEGGSNGGLLVGATMTQRPD LASVAFPAVGVMDMLRFYHTFTAG-AGWAYDYGTAEADNPMEFYYL  
90588230 QNVFDDF IAAAAYL IAQKYTSSDYLAIRGGSNGGLLVGATMTQRPD LMKVALP AVGVMDMLRFYHTFTAG-AGWAYDYGTAEQSKEMFEYLL  
71143549 QNVFDDF IAAGEYL IKQDYTSSDYLAIEGGSNGGLLVGAVMTQRPD LMQVALP AVGVMDMLRFYHTFTAG-AGWAYDYGTAEQSEEMFYYL  
83855898 QNVFDDF IAAAAYL IEKNYTSKEYLAIRGGSNGGLLVGATMTQRPD LMQVALP AVGVMDMLRFYHTFTAG-AGWAYDYGTAEQSKEMFYLL  
85710915 QNVFDDF IAAAAYL IDEDYTSKEKLAIRGGSNGGLLVGATMTQRPD LFAVALP AVGVMDMLRFYHTFTAG-AGWAYDYGTAEQSKEMFYLL  
78368715 QNVFDDYFAAAAYL IDNKYTNQSKLGAYGRSNGGLLVGAAMTQRPD LFAAILP AVGVMDMLRFYHKFTIG-WAWTSEYGSADN-AEQFPAL  
56178266 QNVFDDF IAAAAYL IEKDYTSPELRAIRGGSNGGLLV GAVMTQRPELFAVALP AVGVMDMLRFYHTFTAG-AGWAYDYGTANDSKEMFEYLL

91215481 QNVFDDFIAAAEYLLIAENYNTSSNKLAIRGGSNGGLLVGATMTQRPDLMQVALPAVGVLDMRLRYHTFTSG-AGWAYDYGTSQDSSEMFEYL  
78688320 QNVFDDYFAAAEYLLINEKYTNSTKLGAYGRSNGGLLMGAAVTQRPDLFAAVLPAVGVLDMRLRFHKFTIG-WAWTSEYGSADN-AEQFPAL  
24374294 QNVFDDYFAAAEYLLINEKYTNSTKLGAYGRSNGGLLMGAALTQRPDLFAAVLPAVGVLDMRLRFHKFTIG-WAWTSEYGSADN-AEQFPAL  
456523 KNVFNDFIAAGEYLLQKNGYTSKEYMALSGRSNGGLLVGATMTMRPDLAKVAFPGVGVLDMRLRYNKFTAG-AGWAYDYGTAEDSKEMFEYL  
77816782 QNVFDDYFAAAEYLLINEKYTNSTKLGAYGRSNGGLLMGAAVTQRPDLFAAVLPAVGVLDMRLRFHKFTIG-WAWTSEYGSADN-AEQFPAL  
68547790 QNVFDDYFAAAEYLLISENYTNSSKLGAYGRSNGGLLMGAAVTQRPDLFAAILPAVGVLDMRLRFQKFTIG-WAWTAEYGSADN-AEDFPYL  
82744257 QNVFDDYFAAAEYLLINEKYTNSTKLGAYGRSNGGLLMGAAVTQRPDLFAAVLPAVGVLDMRLRFHKFTIG-WAWTSEYGSADN-AEQFPAL  
86131249 QNVFDDFIAAAEYLLIDNKYTSKKYLAIIRGGSNGGLLVGATMTQRPDLMQVALPAVGMDMLRYHTFTAG-AGWAYDYGTAEDSKEMFEYL  
88796133 QNVFDDFIAAGEYLLVESGYTNPQKMGIQGGSNGGLLVGATLTQRPDLFAAALPAVGVLDMRLRYHTPSANARAWSSDYGLSEN-NDEFEAL  
42526704 QNVFDDFIAAGEYLLIEHKYTSKKLAIQGGSNGGLLIGAVTNQRPDLFAVAIPQVGVLDMRLRYQHFTIG-WAWVDEYGSSEDSKEMFEYL  
27367204 QNVFDDFVAAAEYLLIEQQYTSDDLAIIRGGSNGGLLVGACMTQRPDLFKVALPAVGVLDMRLRYHTFTSG-EGWKYDYGTSQAQSEEMFQYL  
37676919 QNVFDDFIAAAEYLLIEQQYTSDDLAIIRGGSNGGLLVGACMTQRPDLFKVALPAVGVLDMRLRYHTFTSG-EGWKYDYGTSQAQSEEMFQYL  
7585979 QNVFDDFIAAAEYLLIENDYTSDDLAIIRGGSNGGLLVGACMTQRPDLFKVALPAVGVLDMRLRYHTFTSG-EGWKYDYGTSQAQSEAMFQYL  
28809898 QNVFDDFIAAAEYLLIENDYTSERLAIIRGGSNGGLLVGACMTQRPDLFKVALPAVGVLDMRLRYHTFTSG-EGWKYDYGTSQAQSEAMFQYL  
6460324 QNVFDDFAACAHLARQGWTRPERLAIQGGSNGGLLVGASITQRPDLFGAAVAQVGVLDMRLRYHLFTIG-WAWASDYGSRDD-PEMFATL  
91223249 QNVFDDFIAAAEYLLIENDYTSDDLAIIRGGSNGGLLVGACMTQRPDLFKVALPAVGVLDMRLRYHTFTSG-EGWKYDYGTSQAQSEAMFQYL  
56180108 QNVFDDFIAAAEWLNNNYTNKNKLAIQGGSNGGLLVGATMTQRPDLFAAALPAVGMDMLRYQLPSANARGWGSEFGLSEN-KKDFKTL  
55769741 QNCFDDFIAACAELLISAGYTSYRQLCIEGGSNGGLLIAACVNQRPDLFGCALAHVGVMDMLRFHKFTIG-HAWTTDYGCSDN-EEEFHWL  
47507507 QNCFDDFQCAAEYLVKEGYSSAKNITINGGSNGGLLVAACVNQRPDLFGCTIAQVGVMDMLKFHKFTIG-HAWTTDFGCSDN-KEHFDWL  
28502989 QNCFDDFQCAAEYLVKEGYSSAKNITINGGSNGGLLVAACVNQRPDLFGCTIAQVGVMDMLKFHKFTIG-HAWTTDFGCSDN-KEHFDWL  
86144914 QNVFDDFIAAAEFLIEENYTSDDKLAIRGGSNGGLLVGACMTQRPDLFQVALPAVGVLDMRLRYHTFTSG-EGWAYDYGTSQAQNKEMFEYL  
84386759 QNVFDDFIAAAEFLIEENYTSDDTLAIRGGSNGGLLVGACMTQRPDLFQVALPAVGVLDMRLRYHTFTSG-EGWAYDYGTSQAQNKEMFEYL  
63100723 QNCFDDFQCAAEYLVKEGYTSPKRLTINGGSNGGLLVAACVNQRPDLFGCAVAQVGVMDMLKFHKFTIG-HAWTTDFGCSSEI-KEQFDWL  
38649021 QNCFDDFQCAAEYLVKEGYASAEEKITINGGSNGGLLVAACANQRPDLFGCAIAQVGVMDMLKFHKFTIG-HAWTTDYGCSDN-KEHFEWL  
59711729 QNVFDDFIAAAEFLIAEKYTDSSRLAIIRGGSNGGLLVGACMTQRPDLFKVALPAVGVLDMRLRYHTFTSG-EGWAYDYGTSQAQSEEMFNYL  
6755152 QNCFDDFQCAAEYLVKEGYTSPKRLTINGGSNGGLLVAACANQRPDLFGCVIAQVGVMDMLKFHKFTIG-HAWTTDYGCSDT-KQHFEWL  
74215349 QNCFDDFQCAAEYLVKEGYTSPKRLTINGGSNGGLLVAACANQRPDLFGCVIAQVGVMDMLKFHKFTIG-HAWTTDYGCSDT-KQHFEWL  
50514023 QNCFDDFQCAAEYLVKEGYTSPKRLTINGGSNGGLLVATCANQRPDLFGCVIAQVGVMDMLKFHKYTIIG-HAWTTDYGCSDS-KQHFEWL  
26345256 QNCFDDFQCAAEYLVKEGYTSPKRLTINGGSNGGLLVATCANQRPDLFGCVIAQVGVMDMLKFHKYTIIG-HAWTTDYGCSDT-KQHFEWL  
157879458 QNCFDDFQCAAEYLVKEGYTSPKRLTINGGSNGGLLVATCANQRPDLFGCVIAQVGVMDMLKFHKYTIIG-HAWTTDYGCSDS-KQHFEWL  
51592147 QNCFDDFQCAAEYLVKEGYTSPKRLTINGGSNGGLLVATCANQRPDLFGCVIAQVGVMDMLKFHKYTIIG-HAWTTDYGCSDS-KQHFEWL  
10835490 QNCFDDFQCAAEYLVKEGYTSPKRLTINGGSNGGLLVATCANQRPDLFGCVIAQVGVMDMLKFHKYTIIG-HAWTTDYGCSDS-KQHFEWL  
50514022 QNCFDDFQCAAEYLVKEGYTSPKRLTINGGSNGGLLVATCANQRPDLFGCVIAQVGVMDMLKFHKYTIIG-HAWTTDYGCSDS-KQHFEWL  
37928243 QNCFDDFQCAAEYLVKEGYTSPKRLTINGGANGGLLVATCANQRPDLFGCVIAQVGVMDMLKFHKYTIIG-HAWTTDYGCSDS-KQHFEWL  
27065055 QNCFDDFQCAAEYLVKEGYTSPKRLTINGGSNGGLLVATCANQRPDLFGCVIAQVGVMDMLKFHKYTIIG-HAWTTDYGCSDS-KQHFEWL  
5103285 QNCFDDFQCAAEYLVKEGYTSPKRLTINGGSNGGLLVATCANQRPDLFGCVIAQVGVMDMLKFHKYTIIG-HAWTTDYGCSDN-KQHFEWL

13786144 QNCFDDFQCAAEYL I KEGYTTSPKRLT I NGG S NGGL LVAACANQR PDL FGCVIAQ VGVMDMLK FHKFTIG -HAWTTDYGCSDS -KQHF EWL  
 5107662 QNCFDDFQCAAEYL I KEGYTTSPKRLT I NGG S NGGL LVAACANQR PDL FGCVIAQ VGVMDMLK FHKFTIG -HAWTTDYGXSDS -KQHF EWL  
 79382269 QNCFDDFISGAEYLV SAGYTQPSKLCIEGG S NGGL LVGACINQR PDL YGCALAHVGVMDMLR FHKFTIG -HAWTSDYGCSEN -EEEFHWL  
 27066372 QNCFDDFQCAAEYL I KEGYTTSPKRLT I NGG S NGGL LVAACANQR PDL FGCVIAQ VGVMDMLK FHKFTIG -HAWTTDYGCSDS -KQHF EWL  
 19347837 QNCFDDFISGAEYLV SAGYTQPSKLCIEGG S NGGL LVGACINQR PDL YGCALAHVGVMDMLR FHKFTIG -HAWTSDYGCSEN -EEEFHWL  
 109072195 QNCFDDFQCAAEYL I KEGYTTSPKRLT I NGG S NGGL LVAACANQR PDL FGCVIAQ VGVMDMLK FHKFTIG -HAWTTDYGCSDS -KQHF EWL  
 11691900 QNCFDDFQCAAEYL I KEGYTTSPKRLT I NGG S NGGL LVAACANQR PDL FGCVIAQ VGVMDMLK FHKFTIG -HAWTTDYGCSDS -KQHF EWL  
 41349456 QNCFDDFQCAAEYL I KEGYTTSPKRLT I NGG S NGGL LVAACANQR PDL FGCVIAQ VGVMDMLK FHKFTIG -HAWTTDYGCSDS -KQHF EWL  
 558596 QNCFDDFQCAAEYL I KEGYTTSPKRLT I NGG S NGGL LVAACANQR PDL FGCVIAQ VGVMDMLK FHKFTIG -HAWTTDYGCSDS -KQHF EWL  
 53127346 QNCFDDFQYAAKYL I REGYTAPKRLT I NGG S NGGL LVAACANQR PDL FGCVIAQ VGVMDMLK FHKFTIG -HAWTTDYGCSDH -KEQFEWL  
 904214 QNCFDDFQCAAEYL I KEGYTTSPKRLT I NGG S NGGL LVAACANQR PDL FGCVIAQ VGVMDMLK FHKFTIG -HAWTTDYGCSDS -KQHF EWL  
 15217929 QNCFDDFISGAEYLV SAGYTQPSKLCIEGG S NGGL LVGACINQR PDL FGCALAHVGVMDMLR FHKFTIG -HAWTSEFGCSDK -EEEFHWL  
 9558588 QNCFDDFISGAEYLV SAGYTQPSKLCIEGG S NGGL LVGACINQR PDL FGCALAHVGVMDMLR FHKFTIG -HAWTSEFGCSDK -EEEFHWL  
 38345850 QNCFDDFIAAGEFLV SAGYTNP SRLCVEGASNGGL LVAACINQR PDL FGCALAHVGVMDMLR FHKFTIG -RAWTCDFGCSEK -EEEFHWL  
 91082735 QNCFDDFQYAAKYL V ENKYTKVDKLI IQGG S NGGL LVAACINQAP E LFGAAICQ VGVLDMLR FHKFTIG -YAWKSDYGCSEE -QEQFEYL  
 54650756 QNVFDDFQAAAEYL I ENKYTTKDR LAIQGG S NGGL LVGSCINQR PDL FGAAVAQ VGVMDMLR FHKFTIG -HAWCSDYGNPSE -KEHFDNL  
 73973662 QNCFDDFQHAAEYL I KEGYTTSPKRLT I NGG S NGGL LVAACANQR PDL FGCVIAQ VGVMDMLK FHKFTIG -HAWTTDYGCSDS -KQHF EWL  
 73973660 QNCFDDFQHAAEYL I KEGYTTSPKRLT I NGG S NGGL LVAACANQR PDL FGCVIAQ VGVMDMLK FHKFTIG -HAWTTDYGCSDS -KQHF EWL  
 47222200 QKCFDDFLCAA EYL IQEKYTVASRIAINGASNGGL LVAACVNQR PDL FGCVAE VGVMDMLK FHKFTIG -HAWTTDYGCSDN -PEQFEWL  
 73973664 QNCFDDFQHAAEYL I KEGYTTSPKRLT I NGG S NGGL LVAACANQR PDL FGCVIAQ VGVMDMLK FHKFTIG -HAWTTDYGCSDS -KQHF EWL  
 55235507 QNVFDDFQHAAQYL VEHGYTTHDKIAIQGG S NGGL LVGACINQR PDL FGA AIAQ VGVMDMLR FHKFTIG -RAWVSDYGMNE -KEHFENL  
 73973658 QNCFDDFQHAAEYL I KEGYTTSPKRLT I NGG S NGGL LVAACANQR PDL FGCVIAQ VGVMDMLK FHKFTIG -HAWTTDYGCSDS -KQHF EWL  
 71666762 QNCFDDFIEGAKFLH RQGYGSPQTAIMGG S NGGL LVAAVANQAP E LFRVCVQ VGVLDMYK FHKFTIG -HAWKSDYGDPEK -EEDFRVL  
 49523575 QNCFDDFIEGAKFLH GNGYGNPATTAIMGG S NGGL LVAAVANQAP E LFRVCVQ VGVLDMYK FHKFTIG -HAWRSDYGDPEK -EEDFKVL  
 71747962 QNCFDDFIEGAKFLH GNGYGNPATTAIMGG S NGGL LVAAVANQAP E LFRVCVQ VGVLDMYK FHKFTIG -HAWRSDYGDPEK -EEDFKVL  
 33317309 QNCFDDFIEGAKFLH RQGYGSPQTAIMGG S NGGL LVAAVANQAP E LFRVCVCR VGVLDMYK FHKFTIG -HAWKSDYGDPEK -EEDFRVL  
 47224662 QNCFDDFQCAAEYL I KEGYTTSPKRLT I NGG S NGGL LVAACVNQR P E LFGCAVAQ VGVMDMLK FHKFTIG -HAWTTDFGCSDI -KEQFDCL  
 15291259 QNVFDDFQAAAEYL I ENKYTTKDR LAIQGG S NGGL LVGSCINQR PDL FGAAVAQ VGVMDMLR FHKFTIG -HAWCSDYGNPSE -KEHFDNL  
 73973656 QNCFDDFQHAAEYL I KEGYTTSPKRLT I NGG S NGGL LVAACANQR PDL FGCVIAQ VGVMDMLK FHKFTIG -HAWTTDYGCSDS -KQHF EWL

:: \* \* : .. \* \* : \*\*\*\* : : : \* \* \*\* : \*\* : : . \* : : \* :

Prim.cons. QNVFDDFIAAAEYL I KEGYTTSPKRLAINGG S NGGL LVGACMNQR PDL FGCALPAVGVMDMLR FHKFTIGAHAWTTDYGCSD2SKEMFEWL

820 830 840 850 860 870 880 890 900

|           |                                                                                           |
|-----------|-------------------------------------------------------------------------------------------|
| 62738741  | RRYSPYHNVRSG-----VDYPAILVTTADTDDRVPVPGHSFKYTAALQTAAI GPKP-----HLIRIETRAGHGSGKPIDKQ-----   |
| 87200538  | RAYSPYHNIASG-----KDYPAILVTTADTDDRVPVPGHSFKYAAALQAASIGSKP-----HLIRIETRAGHGSGKPVAKL-----    |
| 103487461 | LSYSPYHNIRSG-----VAYPAVLVTTADTDDRVPVPGHSFKYTAALQHAKAGSKP-----HLIRIETRAGHGSGKPTDKI-----    |
| 87200537  | RAYSPYHNIATG-----KPYPAILVTTADNDDRVVPVPAHSFKYVAALQAGDIGEKP-----HLLRVE SRAGHGAGKPV DKV----- |
| 94496227  | YGYSPYHNIAGG-----SDYPAILVSTADTDDRVPVPAHSFKYAAALQAADLGARP-----RLLRVE SRAGHGAGKPV DKL-----  |
| 35211243  | YAYSPLHNLKAG-----TRYPATLVTTADTDDRVPVPGHSYKFTAALQAAQAGEGP-----VLIRIETKAGHGAGKPTTKL-----    |
| 32448009  | LSYSPLHNLKPG-----TCYPATMVTTADRDRVVPVPGHSFKFAAALQAAQSCDNP-----TLIRIETRAGHGAGTPTSCK-----    |
| 75906687  | YAYSPLHNLKSG-----TAYPATLI TTADHDDRVPVPAHSFKFAAALQTAHNGNAP-----VLIRIETKAGHGAGKPTAKI-----   |
| 35211187  | YAYSPLHNLKAG-----TRYPATLVTTADTDDRVPVPGHSYKFTAALQAAQAGEGP-----VLIRIETKAGHGAGKPTTKL-----    |
| 67921530  | LAYSPLHNL TAN-----TAYPATMI TTADHDDRVPVPAHSFKFAAALQNAHDGEKP-----VLIRIETKAGHGAGKPTTKL-----  |
| 67930945  | RAYSPLHNI RAG-----TEYPAVLVTTSDHDDRVPVPAHSFKFAAALQTAHQKGPAP-----ILLRVETRAGHGAGKPTAKQ-----  |
| 17131625  | YAYSPLHNLKPG-----TAYPATLI TTADHDDRVPVPAHSFKFAAALQVAQGGSQP-----ILIRIDTKAGHGAGKPTSKL-----   |
| 86609965  | YAYSPLHNLKPG-----TAYPATLI TTADHDDRVPVPAHSFKFAAALQVAQGGSQP-----ILIRIDTKAGHGAGKPTSKL-----   |
| 83859556  | YGYSPYHNIPET-----GEYPATLI TTADTDDRVPVPGHSFKYAAALQAAQTGDAP-----TLIRIETRAGHGAGTPVSKL-----   |
| 28808634  | KGYSPLVHNVKAG-----VEYPATLI TTGDHDDRVPVPAHSYKFAAELQSKQAGSNP-----TLIRIETNAGHGAGTPTRKI-----  |
| 75854458  | KGYSPLVHNVKAG-----VEYPATLI TTGDHDDRVPVPAHSYKFAAELQSKQAGSNP-----TLIRIETNAGHGAGTPTRKI-----  |
| 86607173  | YAYSPLHNLKPG-----TAYPATLI TTADHDDRVPVPAHSFKFAAALQAAQGGSQP-----ILIRIDTKAGHGAGKPTAKL-----   |
| 23128197  | YAYSPLHNI KPD-----TAYPATLI TTADHDDRVPVPAHSFKFAAALQEAHAGDAP-----VLIRIETKAGHGAGKPTAKI-----  |
| 91226380  | KGYSPLVHNVKAG-----VEYPATLI TTGDHDDRVPVPAHSYKFAAELQSKQAGSNP-----TLIRIETNAGHGAGTPTRKI-----  |
| 88711708  | KGYSPLVHNVKEG-----TEYPATLVTTGDHDDRVPVPAHSFKFAAELQSKQAGPNP-----TLIRIETNAGHGAGTPVSKT-----   |
| 110167745 | YAYSPLHNLKPK-----TSYPPTFI TTADHDDRVPVPAHSFKFISTLQEVHIGDHP-----VLIRIETKAGHGAGKPTTKI-----   |
| 109899092 | MTYSPVQNVREG-----VNYPATLI TTGDHDDRVPVPAHSFKFAAALQAKNTGPNP-----MLIRIETNAGHGAGTPISKT-----   |
| 86144168  | KGYSPLVHNVKTG-----TEYPATLVTTGDHDDRVPVPAHSFKFAAELQEKQAGDAP-----VLIRIETDAGHGAGTPVSKQ-----   |
| 4973227   | KGYSPLHNV RPG-----VSYPSTMVTTADHDDRVPVPAHSFKFAATLQADNAGPHP-----QLIRIETNAGHGAGTPVAKL-----   |
| 6048357   | KGYSPLHNV RPG-----VSYPSTMVTTADHDDRVPVPAHSFKFAATLQADNAGPHP-----QLIRIETNAGHGAGTPVAKL-----   |
| 76875127  | KNYSPLHNVKAG-----IEYPATMI TTGDHDDRVPVPAHSFKFAAALQAKQAGTNP-----TLIRIETNAGHGAGTPTSKI-----   |
| 216201    | KGYSPLHNSVRAG-----VSYPSTLVTTADHDDRVPVPAHSFKFAATLQADDAGPHP-----QLIRIETNAGHGAGTPVAKL-----   |
| 88804657  | KGYSPLHNI REG-----VAYPATLVTTADHDDRVPVPAHSFKFAATLQEKHAGESP-----VLIRIETNAGHGAGTPISKT-----   |
| 89517967  | KGYSPLHNI QEG-----VYYPATMVTTGDHDDRVPVPAHSFKFAAELQSKQAGDAP-----TLIRIETDAGHGAGKSTAQV-----   |
| 90588230  | KGYSPLVQNVKKG-----TKYPATMVTTGDHDDRVPVPAHSFKFAAELQDKQAGENP-----VLIRIDVKAGHGAGKSVAAAT-----  |
| 71143549  | KGYSPLVHNVKAG-----VSYPATMVTTGDHDDRVPVPAHSFKFAAELQAKQAGNAP-----TLIRIETNAGHGAGTPVSKT-----   |
| 83855898  | KGYSPLVHNVKEG-----VSYPATMVTTGDHDDRVPVPAHSFKYAAELQDKQAGNAP-----TLIRIETNAGHGAGTPVSKT-----   |
| 85710915  | LNYSPLVHNV EQG-----VEYPATLI TTGDHDDRVPVPAHSFKFAAELQDKAGGDAP-----QLIRIETNAGHGAGTPVSKT----- |
| 78368715  | LAYSPLYHNISE-----RDYPATMVMTADHDDRVPVPLHSFKFGALLQDRQTGDAP-----IIMRIESKAGHGAGKPTAMK-----    |
| 56178266  | LGYSPVHNV EEG-----VAYPATLI TTGDHDDRVPVPAHSFKFAAELQDKAGGENP-----QLIRIETNAGHGAGTPVSKT-----  |

91215481 KGYSP<sup>L</sup>H<sup>S</sup>IKDG-----TEYPATLVTTGDHDD<sup>R</sup>VVPAHSFKFAAELQSKQAGGAP-----TLIRIETDAGHGAGKPTS<sup>K</sup>I-----  
 78688320 LAYSPY<sup>H</sup>NVKT-----QAYPATMVMVTADHDD<sup>R</sup>VVPLHSFKFAAMMQEMQQGDKP-----VIMRIESNAGHGAGKPTAM<sup>K</sup>-----  
 24374294 LAYSPY<sup>H</sup>NVKA-----QAYPATMVMVTADHDD<sup>R</sup>VVPLHSFKFAAMMQEKQQGDKP-----VIMRIESNAGHGAGKPTSM<sup>K</sup>-----  
 456523 KSYSPV<sup>H</sup>NVKAG-----TCYPSTMVITSDHDD<sup>R</sup>VVPAHSFKFGESELQAKQSCKNP-----ILIRIETNAGHGAGRSTEQV-----  
 77816782 LAYSPY<sup>H</sup>NVKA-----QSYPATMVMVTADHDD<sup>R</sup>VVPLHSFKFAAMLQDKQQGDKP-----VIMRIESNAGHGAGKPTAM<sup>K</sup>-----  
 68547790 LAYSPY<sup>H</sup>NVKA-----QTYPATMVMVTADHDD<sup>R</sup>VVPLHSFKFAGMLQAKQQGQAP-----VIMRIESKAGHGAGKPTAM<sup>Q</sup>-----  
 82744257 LAYSPY<sup>H</sup>NVKA-----QSYPATMVMVTADHDD<sup>R</sup>VVPLHSFKFAAMLQDKQQGDKP-----VIMRIESNAGHGAGKPTAM<sup>K</sup>-----  
 86131249 KGYSPV<sup>H</sup>NVKAG-----TSYPATMVTTGDHDD<sup>R</sup>VVPAHSFKFAAELQEKQAGDAP-----VLIRIETDAGHGAGTPVAKT-----  
 88796133 YAYSPV<sup>H</sup>NTKPG-----TCYPATLVTTGDHDD<sup>R</sup>VVPWHSYKFAAQLQADQGCNDP-----VLLRVETRAGHGAGTPTW<sup>M</sup>R-----  
 42526704 YAYSP<sup>L</sup>H<sup>N</sup>VKEG-----VNYP SIMVCTGDHDD<sup>R</sup>VVPAHSFKYAQALHDTYKGENP-----ILIRITEKAGHGAGKPTAK<sup>I</sup>-----  
 27367204 LGYSPV<sup>H</sup>NVKEG-----TAYPATLVTTADHDD<sup>R</sup>VVPAHSYKFIAELQEKHQGANP-----VLIRIDVNAGHGAGMPMSK<sup>M</sup>-----  
 37676919 LGYSPV<sup>H</sup>NVKEG-----TAYPATLVTTADHDD<sup>R</sup>VVPAHSYKFIAELQEKHQGANP-----VLIRIDVNAGHGAGMPMSK<sup>M</sup>-----  
 7585979 LGYSPV<sup>H</sup>NVKEN-----VQYPATLVTTADHDD<sup>R</sup>VVPAHSYKFIAELQDKQQGANP-----VLIRIDVNAGHGAGMPLSK<sup>Q</sup>-----  
 28809898 LGYSPV<sup>H</sup>NVKEG-----VQYPATLVTTADHDD<sup>R</sup>VVPAHSYKFIAELQDKQQGENP-----VLIRIDVNAGHGAGMPLSK<sup>Q</sup>-----  
 6460324 HAYSP<sup>L</sup>H<sup>N</sup>LKEG-----TRYPATLITTTGDHDD<sup>R</sup>VVPAHSYKFAAELQRVQAGSAP-----TLIRIQTRAGHGAGKPTALV-----  
 91223249 LGYSPV<sup>H</sup>NVKEN-----VQYPATLVTTADHDD<sup>R</sup>VVPAHSYKFIAELQDKQQGANP-----VLIRIDVNAGHGAGMPLSK<sup>Q</sup>-----  
 56180108 YAYSPV<sup>H</sup>NTESG-----TCYPATLITTTGDHDD<sup>R</sup>VVPWHSYKFAAALQRDQSCDQP-----ILLNVETRAGHGAGTPTW<sup>M</sup>R-----  
 55769741 IKYSP<sup>L</sup>H<sup>N</sup>VRRPWEQSFVNCCQYPAIMLLTADHDD<sup>R</sup>VVPLHSLKLLATLQYVLC<sup>T</sup>SIEDTPQVNP IIGRIDVKSGHGAGRPTK<sup>K</sup>M-----  
 47507507 IKYSP<sup>L</sup>H<sup>N</sup>IRVPEKDG----IQYPSMLLLTADHDD<sup>R</sup>VVPLHSLKF IASLQ<sup>H</sup>IVGRSPN---QTNPLLIHVDTKAGHGAGKPTAK<sup>V</sup>-----  
 28502989 IKYSP<sup>L</sup>H<sup>N</sup>IRVPEKDG----IQYPSMLLLTADHDD<sup>R</sup>VVPLHSLKF IASLQ<sup>H</sup>IVGRSPN---QTNPLLIHVDTKAGHGAGKPTAK<sup>V</sup>-----  
 86144914 LGYSPV<sup>H</sup>NVVRG-----TDYPATLVTTADHDD<sup>R</sup>VVPAHSYKFI SELQDKHEGGAP-----VMIRIDVNAGHGAGMPLSKA-----  
 84386759 QGYSPV<sup>H</sup>NVVRG-----VDYPATLVTTADHDD<sup>R</sup>VVPAHSYKFI SELQDKHEGGVP-----VMIRIDVNAGHGAGMPLSKA-----  
 63100723 IKYSP<sup>L</sup>H<sup>N</sup>IQVPEGDG----VQYPAVLLLTGDHDD<sup>R</sup>VVPLHSLKYIATLQ<sup>N</sup>VIQCPG---QKNPLFIYIDTKSGHGAGKPTSK<sup>V</sup>-----  
 38649021 IKYSP<sup>L</sup>H<sup>N</sup>IKVPEKDG----IQYPSMLLLTADHDD<sup>R</sup>VVPLHSLKF IASLQ<sup>H</sup>IAGQSPN---QTNPLLIHVDTKAGHGAGKPTAK<sup>V</sup>-----  
 59711729 LNYSPV<sup>H</sup>NVKEG-----VEYPATLVTTADHDD<sup>R</sup>VVPAHSYKFI SELQAKQSGDNP-----VLIRIDVNAGHGAGMPI<sup>S</sup>KS-----  
 6755152 LKYSP<sup>L</sup>H<sup>N</sup>VKLPEADD----IQYPSMLLLTADHDD<sup>R</sup>VVPLHSLKF IATLQ<sup>Y</sup>IVGRSRK---QSNPLLIHVDTKAGHGAGKPTAK<sup>V</sup>-----  
 74215349 LKYSP<sup>L</sup>H<sup>N</sup>VKLPEADD----IQYPSMLLLTADHDD<sup>R</sup>VVPLHSLKF IATLQ<sup>Y</sup>IVGRSRK---QSNPLLIHVDTKAGHGAGKPTAK<sup>V</sup>-----  
 50514023 IKYSP<sup>L</sup>H<sup>N</sup>VKLPEADD----IQYPSMLLLTADHDD<sup>R</sup>VVPLHSLKF IATLQ<sup>Y</sup>IVGRSRK---QNNPLLIHVDTKAGHGAGKPTAK<sup>V</sup>-----  
 26345256 LKYSP<sup>L</sup>H<sup>N</sup>VKLPEADD----IQYPSMLLLTADHDD<sup>R</sup>VVPLHSLKF IATLQ<sup>Y</sup>IVGRSRK---QSNPLLIHVDTKAGHGAGKPTAK<sup>V</sup>-----  
 157879458 IKYSP<sup>L</sup>H<sup>N</sup>VKLPEADD----IQYPSMLLLTADHDD<sup>R</sup>VVPLHSLKF IATLQ<sup>Y</sup>IVGRSRK---QNNPLLIHVDTKAGHGAGKPTAK<sup>V</sup>-----  
 51592147 IKYSP<sup>L</sup>H<sup>N</sup>VKLPEADD----IQYPSMLLLTADHDD<sup>R</sup>VVPLHSLKF IATLQ<sup>Y</sup>IVGRSRK---QNNPLLIHVDTKAGHGAGKPTAK<sup>V</sup>-----  
 10835490 IKYSP<sup>L</sup>H<sup>N</sup>VKLPEADD----IQYPSMLLLTADHDD<sup>R</sup>VVPLHSLKF IATLQ<sup>Y</sup>IVGRSRK---QNNPLLIHVDTKAGHGAGMPTAK<sup>V</sup>-----  
 50514022 IKYSP<sup>L</sup>H<sup>N</sup>VKLPEADD----IQYPSMLLLTADHDD<sup>R</sup>VVPLHSLKF IATLQ<sup>Y</sup>IVGRSRK---QNNPLLIHVDTKAGHGAGKPTAK<sup>V</sup>-----  
 37928243 IKYSP<sup>L</sup>H<sup>N</sup>VKLPEADD----IQYPSMLLLTADHDD<sup>R</sup>VVPLHSLKF IATLQ<sup>Y</sup>IVGRSRK---QNNPLLIHVDTKAGHGAGKPTAK<sup>V</sup>-----  
 27065055 IKYSP<sup>L</sup>H<sup>N</sup>VKLPEADD----IQYPSMLLLTADHDD<sup>R</sup>VVPLHSLKF IATLQ<sup>Y</sup>IVGRSRK---QNNPLLIHVDTKAGHGAGKPTAK<sup>V</sup>-----  
 5103285 IKYSP<sup>L</sup>H<sup>N</sup>VKLPEADD----IQYPSMLLLTADHDD<sup>R</sup>VVPLHSPK<sup>F</sup>IATLQ<sup>H</sup>LIVGRSRK---QNNPLLIH<sup>V</sup>DTKAGHGAGKPTAK<sup>V</sup>-----

```

13786144 LKYSPLHNVKLPEADD----IQYPSMLLLTADHDDRVVPLHSLKFIATLQYIVGRSRK---QSNPLLIHVDTKAGHGAGKPTAKV-----
5107662 IKYSPLHNVKLPEADD----IQYPSMLLLTADHDDRVVPLHSLKFIATLQYIVGRSRK---QNNPLLIHVDTKAGHGAGKPTAKV-----
79382269 IKYSPLHNVKRPWEQQTDHLVQYPSMLLLTADHDDRVVPLHSLKLLATLQHVLCTSLDNSPQMNPIIGRIEVKAGHGAGRPTQKM-----
27066372 IKYSPLHNVKLPEADD----IQYPSMLLLTADHADRVVPLHSLKFIATLQYIVGRSRK---QNNPLLIHVDTKAGHGAGKPTAKV-----
19347837 IKYSPLHNVKRPWEQQTDHLVQYPSMLLLTADHDDRVVPLHSLKLLATLQHVLCTSLDNSPQMNPIIGRIEVKAGHGAGRPTQKM-----
109072195 VKYSPLHNVKLPEADD----IQYPSMLLLTADHDDRVVPLHSLKFIATLQYIVGRSRK---QSNPLLIHVDTKAGHGAGKPTAKV-----
11691900 VKYSPLHNVKLPEADD----IQYPSMLLLTADHDDRVVPLHSLKFIATLQYIVGRSRK---QSNPLLIHVDTKAGHGAGKPTAKV-----
41349456 VKYSPLHNVKLPEADD----IQYPSMLLLTADHDDRVVPLHSLKFIATLQYIVGRSRK---QSNPLLIHVDTKAGHGAGKPTAKV-----
558596 VKYSPLHNVKLPEADD----IQYPSMLLLTADHDDRVVPLHSLKFIATLQYIVGRSRK---QSNPLLIHVDTKAGHGAGKPTAKV-----
53127346 CKYSPLHNVKLPEEDG----IQYPATLLLTADHDDRVVPLHSLKFIATLQYVVGRSRK---QTNPLLIHVDTKAGHGAGKPTAKV-----
904214 VKYSPLHNVKLPEADD----IQYPSMLLLTADHDDRVVPLHSLKFIATLQYIVGRSRK---QSNPLLIHVDTKAGHGAGKPTAKV-----
15217929 IKYSPLHNVKRPWEQKTDLFFQYPSMLLLTADHDDRVVPLHSYKLLATMQYELGLSLENSPQTNPIIARIEVKAGHGAGRPTQKM-----
9558588 IKYSPLHNVKRPWEQKTDLFFQYPSMLLLTADHDDRVVPLHSYKLLATMQYELGLSLENSPQTNPIIARIEVKAGHGAGRPTQKMCNVCE
38345850 IKYSPLHNVRRPWEKG--HRRQYPSMLLLTADHDDRVVPSHTLKFLATMQHVLCTSVKESPQTNPIIVARIDRKSGHGCGRSTQKI-----
91082735 YKYSPLHNIRVPQNGGQY-----PATLLLTADHDDRVVPLHSLKFIAEALQNKIGRLPT---QKNPLMIRIETRAGHGAGKPTSKI-----
54650756 YKFSPLHNVHTPKGAETEY----PSTLILTADHDDRVSPLHSLKFIAAALQEAVRDSEF---QKNPVLLRVYQKAGHGAGKPTSKR-----
73973662 IKYSPLHNVRLEADD----TQYPSMLLLTADHDDRVVPLHSLKFIATLQYVVGRSRK---QSNPLLIHVDTKAGHGAGKPTAKV-----
73973660 IKYSPLHNVRLEADD----TQYPSMLLLTADHDDRVVPLHSLKFIATLQYVVGRSRK---QSNPLLIHVDTKAGHGAGKPTAKV-----
47222200 IKYSPLHNLPQPPYSG----PAYPAVLLLTADHDDRVVPLHTLKYCAALQHGVGSSPA---QRQPLMVRVDTRSGHGAGKPTSKV-----
73973664 IKYSPLHNVRLEADD----TQYPSMLLLTADHDDRVVPLHSLKFIATLQYVVGRSRK---QSNPLLIHVDTKAGHGAGKPTAKV-----
55235507 LRYSPLHNVRTPTSEKDQY----PATLVLTADHDDRVSPLHSLKFIVAALHDAIKDSEH---QKNPLLLRVYSKAGHGAGKPTAKK-----
73973658 IKYSPLHNVRLEADD----TQYPSMLLLTADHDDRVVPLHSLKFIATLQYVVGRSRK---QSNPLLIHVDTKAGHGAGKPTAKV-----
71666762 QKYSPLHNIKSGIKYP-----AILVVTGDHDDRVVPLHSLKYVATLQHMNPTEGG-----PFLARIEVAAGHGAGKPTSKI-----
49523575 QKYSPLHNIKSGVKYP-----AILVVTGDHDDRVVPLHSLKYIAALQHENPTEGG-----PFLARVEVAAGHGAGKPTSKI-----
71747962 QKYSPLHNIKSGVKYP-----AILVVTGDHDDRVVPLHSLKYIAALQHENPTEGG-----PFLARVEVAAGHGAGKPTSKI-----
33317309 QQYSPLHNIKSGIKYP-----AILVVTGDHDDRVVPLHSLKYVATLQHMNPNEGG-----PFLARIEVAAGHGAGKPTSKI-----
47224662 MKYSPLHNIHVPEGNG---VQYPAVLLLTGDHDDRVVPLHSLKYIATLQHIVGRSPK---QTNPLFILVDTKSGHGAGKPTSKV-----
15291259 YKFSPLHNVHTPKGAKRN-----THRL-----
73973656 IKYSPLHNVRLEADD----TQYPSMLLLTADHDDRVVPLHSLKFIATLQYVVGRSRK---QSNPLLIHVDTKAGHGAGKPTAKV-----
: ** :. . * :
Prim.cons. IKYSPLHNVKLGEADDD32TQYPATLVTTADHDDRVVPLHSLKFIATLQYKQGGSRPNSPQSNPLLIRETKAGHGAGKPTAKVCNVCE

```

910 920 930 940 950

|           |                                                          |
|-----------|----------------------------------------------------------|
| 62738741  | ---IEETADVQAFLAHFTG-----LTPRPWSSVDKLA AAAL EHHHHHHH----- |
| 87200538  | ---IAENADVYAFVAHWGT-----LTPKE-----                       |
| 103487461 | ---IAEAADKYAFAAKWTG-----LDVE-----                        |
| 87200537  | ---IGAGADVMAFLAYWTG-----LSL-----                         |
| 94496227  | ---IDEYADSYAFAAHFTG-----LAIAPRPAAAPRSAAGQPAHVMAPIVAGGQ   |
| 35211243  | ---IEEAADRWAFLVANLR-----MQLKF-----                       |
| 32448009  | ---IDEYADLWSFLLLENLK-----                                |
| 75906687  | ---IEEAADKWAFLVRLA-----VEV-----                          |
| 35211187  | ---IEEAADRWAFLVANLR-----MQLKF-----                       |
| 67921530  | ---IEEIADKWAFLVDNLA-----FNVL-----                        |
| 67930945  | ---IDEAADILTFLKAALK-----VN-----                          |
| 17131625  | ---IEEAADKWAFLVRTLA-----VEV-----                         |
| 86609965  | ---IEEAADRWAFLVQVLG-----IPWDGTGS-----                    |
| 83859556  | ---IEEAADRWAFIAYHTG-----LEIED-----                       |
| 28808634  | ---IETNADIYSFALFNMG-----IEKLQ-----                       |
| 75854458  | ---IETNADIYSFALFNMG-----IEKLQ-----                       |
| 86607173  | ---IEETADRWAFLVQVLG-----IQAG-----                        |
| 23128197  | ---IEEAADKWAFLVRTLD-----VEV-----                         |
| 91226380  | ---IETNADIYSFALFNMG-----IEKLQ-----                       |
| 88711708  | ---IEQYADIFGFTLFNMG-----FEELPNQRVLKEFKD-----             |
| 110167745 | ---IAEITDEF AFLLRNLK-----IELPENFGN-----                  |
| 109899092 | ---IEQYADIFGFTLYNMG-----IKVQ-----                        |
| 86144168  | ---IEQTADIFAFTLYNMG-----FDVLPEKTKS-EIKG-----             |
| 4973227   | ---IEQSADIIYAFTLYEMG-----YRELPRQP-----                   |
| 6048357   | ---IEQSADIIYAFTLYEMG-----YRELPRQP-----                   |
| 76875127  | ---IDL YADMYGFTLYNMG-----VKSL-----                       |
| 216201    | ---IEQSADIIYAFTLFEMG-----YRQLPRQP-----                   |
| 88804657  | ---IEQYADIFGFTFYNMG-----YEELPNQAALKDFKE-----             |
| 89517967  | ---IQEQTDIYSFALFNMG-----FEELPELSTRVKM-----               |
| 90588230  | ---IQENVDIQAFTLYNMG-----FKALPK-----                      |
| 71143549  | ---IEQYADIIYAFTLFNMG-----FTALPK-----                     |
| 83855898  | ---IEQYADIFGFTLYNMG-----YDELPVKK---QFKD-----             |
| 85710915  | ---IEQYSDIFGFTLYHMG-----YQSLPNE-----                     |
| 78368715  | ---IDEFADIYSFLMHSFG-----LAVPSKIGG-----                   |
| 56178266  | ---IEQYSDIFGFTLYHMG-----FEELPE-----                      |

|           |                                                      |
|-----------|------------------------------------------------------|
| 91215481  | ---IQEYADIFAFTFYNMG-----YTEL-----                    |
| 78688320  | ---IDEFADIYSFLWQSFG-----LTLPQTLAK-----               |
| 24374294  | ---IDEFADIYSFLWQSFG-----LTLPQTLAK-----               |
| 456523    | ---VAENADLLSFALYEMG-----IKSLK-----                   |
| 77816782  | ---IDEFADIYSFLWQSFG-----LTLPQTIAK-----               |
| 68547790  | ---IAEFADIYAFLWQNFG-----LTLPTEL-----                 |
| 82744257  | ---IDEFADIYSFLWQSFG-----LKLPTIATK-----               |
| 86131249  | ---IEQYADIFGFTLYNMG-----YEVLPKVGNG-VMKK-----         |
| 88796133  | ---IEGYADQWAFLESALE-----                             |
| 42526704  | ---IEETADIYAFIFKQGTG-----HII-----                    |
| 27367204  | ---IDLSADMYAFTLFNMG-----ITALK-----                   |
| 37676919  | ---IDLSADIYAFTLFNMG-----ITALK-----                   |
| 7585979   | ---IDLTTDVYAFTLYNMG-----IESI-----                    |
| 28809898  | ---IDLTTDVYAFTLYNMG-----IESI-----                    |
| 6460324   | ---IEEAADIWAFLEEVLG-----G-----                       |
| 91223249  | ---IDLTTDVYAFTLHNMG-----IESI-----                    |
| 56180108  | ---IEEHAENWAFLYKHLG-----MNSEVVQSNASE-----            |
| 55769741  | ---IDEVADRYSFMANMLD-----ASWTE-----                   |
| 47507507  | ---IEEVSDMF AF IAQCLG-----LQWIE-----                 |
| 28502989  | ---IEEVSDMF AF IAQCLG-----LQWIE-----                 |
| 86144914  | ---IDLTDIYAFTLFNMG-----IESLDSI-----                  |
| 84386759  | ---LDLTADIYAFTLFNMG-----IESLDSL-----                 |
| 63100723  | ---IQEVADTYAFIARCLN-----LSWLE-----                   |
| 38649021  | ---IEEVSDMF AF IAQCLN-----LQWIE-----                 |
| 59711729  | ---MDLMADVYAFTLSNMK-----VNPFE-----                   |
| 6755152   | ---IEEVSDMF AF IARCLN-----IEWIQ-----                 |
| 74215349  | ---IEEVSDMF AF IARCLN-----IEWIQ-----                 |
| 50514023  | ---IEEVSDMF AF IARCLN-----IDWIP-----                 |
| 26345256  | ---IEEVSDMF AF IAAVPEHRVDPVNGISSSSHQTQKTSRAFTPS----- |
| 157879458 | ---IEEVSDMF AF IARCLN-----IDWIPXGP-----              |
| 51592147  | ---IEEVSDMF AF IARCLN-----IDWIP-----                 |
| 10835490  | ---IEEVSDMF AF IARCLN-----IDWIP-----                 |
| 50514022  | ---IEEVSDMF AF IARCLN-----IDWIP-----                 |
| 37928243  | ---IEEVSDMF AF IARCLN-----IDWIP-----                 |
| 27065055  | ---IEEVSDMF AF IARCLN-----IDWIP-----                 |
| 5103285   | ---IEEVSDMF AF IARCLN-----IDWIP-----                 |



```

13786144    ---IEEVSDMF AFIARCLN-----IEWIQ-----
5107662     ---IEEVSDMF AFIARCLN-----IDWIP-----
79382269    ---IDEAADRY SFMAKMVN-----ASWTE-----
27066372    ---IEEVSDMF AFIARCLN-----IDWIP-----
19347837    ---IDEAADRY SFMAKMVN-----ASWTE-----
109072195   ---IEEVSDMF AFIARCLN-----IDWIP-----
11691900    ---IEEVSDMF AFIARCLN-----VDWIP-----
41349456    ---IEEVSDMF AFIARCLN-----VDWIP-----
558596      ---IEEVSDMF AFIARCLN-----VDWIP-----
53127346    ---IEEVSDMF AFIARCLN-----LDWIE-----
904214      ---IEEVSDMF AFIARCLN-----IDWIP-----
15217929    ---IDEAADRY SFMAKMVD-----ASWID-----
9558588     LQQIDEAADRY SFMAKMVD-----ASWID-----
38345850    ---IDEAADRY AF AAKTMG-----ISWID-----
91082735    ---IEEVTDTF CFISRALN-----LTFSS-----
54650756    ---IEEATDIL TFLSKSLN-----VDIVNV-----
73973662    ---IEEVSDMF AFIARCLD-----IDWIQ-----
73973660    ---IEEVSDMF AFIARCLD-----IDWIQ-----
47222200    ---ILEDTDIF SFIAETLG-----LSW-----
73973664    ---IEEVSDMF AFIARCLD-----IDWIQ-----
55235507    ---IEEATDIL TFMKYKTLG-----LKL SF-----
73973658    ---IEEVSDMF AFIARCLD-----IDWIQ-----
71666762    ---LREAGDIY TFIAKNIN-----ASWKE-----
49523575    ---MQESADIY TFIAKN TN-----AQWTD-----
71747962    ---MQESADIY TFIAKN TN-----AQWTD-----
33317309    ---LREAGDIY TFIAKN IN-----ASWKE-----
47224662    ---IQEVADTY AFIAKCLN-----ISWVE-----
15291259    -----
73973656    ---IEEVSDMF AFIARCLD-----IDWIQ-----

```

Prim.cons. LQQIEEVADIFAFIARNLGHVRVDPIDWIP2QAK2KEFK23333H322PIVAGGQ

**Alignment data :**  
Alignment length : 954

**CLUSTALW options used :**  
endgaps=1

Identity (\*) : 46 is 4.82 %  
Strongly similar (:) : 47 is 4.93 %  
Weakly similar (.) : 29 is 3.04 %  
Different : 832 is 87.21 %

gapdist=8  
gapext=0.2  
gapopen=10.0  
hgapresidues=GPSNDQERK  
matrix=gonnet  
maxdiv=30  
outorder=input  
type=PROTEIN

### **Names of proteins corresponding to numbers used in alignment:**

>gil62738741|pdb|1YR2|A Chain A prolyl oligopeptidase [Novosphingobium capsulatum]  
>gil87200538|ref|YP\_497795.1| Prolyl oligopeptidase [Novosphingobium aromaticivorans DSM 12444]  
>gil103487461|ref|YP\_617022.1| Prolyl oligopeptidase [Sphingopyxis alaskensis RB2256]  
>gil87200537|ref|YP\_497794.1| Prolyl oligopeptidase [Novosphingobium aromaticivorans DSM 12444]  
>gil94496227|ref|ZP\_01302805.1| Prolyl oligopeptidase [Sphingomonas sp. SKA58]  
>gil35211243|dbj|BAC88622.1| prolyl endopeptidase [Gloeobacter violaceus PCC 7421]  
>gil32448009|embl|CAD77529.1| prolyl endopeptidase [Rhodopirellula baltica SH 1]  
>gil75906687|ref|YP\_320983.1| Peptidase S9, prolyl oligopeptidase active site region [Anabaena variabilis ATCC 29413]  
>gil35211187|dbj|BAC88566.1| prolyl endopeptidase [Gloeobacter violaceus PCC 7421]  
>gil67921530|ref|ZP\_00515048.1| Prolyl oligopeptidase [Crocospaera watsonii WH 8501]  
>gil67930945|ref|ZP\_00524112.1| Prolyl oligopeptidase [Solibacter usitatus Ellin6076]  
>gil17131625|dbj|BAB74232.1| prolyl endopeptidase [Nostoc sp. PCC 7120]  
>gil86609965|ref|YP\_478727.1| prolyl oligopeptidase [Synechococcus sp. JA-2-3B'a(2-13)]  
>gil83859556|ref|ZP\_00953076.1| prolyl endopeptidase [Oceanicaulis alexandrii HTCC2633]  
>gil28808634|dbj|BAC61811.1| prolyl endopeptidase [Vibrio parahaemolyticus RIMD 2210633]  
>gil75854458|ref|ZP\_00762150.1| COG1505: Serine proteases of the peptidase family S9A [Vibrio sp. Ex25]  
>gil86607173|ref|YP\_475936.1| prolyl oligopeptidase [Synechococcus sp. JA-3-3Ab]  
>gil23128197|ref|ZP\_00110050.1| COG1505: Serine proteases of the peptidase family S9A [Nostoc punctiforme PCC 73102]  
>gil91226380|ref|ZP\_01261179.1| prolyl endopeptidase [Vibrio alginolyticus 12G01]  
>gil88711708|ref|ZP\_01105796.1| Prolyl endopeptidase [Flavobacteriales bacterium HTCC2170]

>gil110167745|gblABG52285.1| prolyl oligopeptidase. Serine peptidase. MEROPS family S09A [Trichodesmium erythraeum IMS101]  
 >gil109899092|refl|YP\_662347.1| Prolyl oligopeptidase [Pseudoalteromonas atlantica T6c]  
 >gil86144168|refl|ZP\_01062505.1| Prolyl endopeptidase [Flavobacterium sp. MED217]  
 >gil4973227|gblAAD34991.1| prolyl endopeptidase [Aeromonas punctata subsp. punctata]  
 >gil6048357|gblAAF02211.1| prolyl endopeptidase [Aeromonas punctata subsp. punctata]  
 >gil76875127|embl|CAI86348.1| Prolyl endopeptidase [Pseudoalteromonas haloplanktis TAC125]  
 >gil216201|dbj|BAA03105.1| prolyl endopeptidase [Aeromonas hydrophila]  
 >gil88804657|refl|ZP\_01120177.1| Prolyl endopeptidase [Robiginitalea biformata HTCC2501]  
 >gil89517967|gblEAS20623.1| prolyl endopeptidase serine protease [Flavobacteria bacterium BBFL7]  
 >gil90588230|refl|ZP\_01243882.1| Prolyl oligopeptidase [Flavobacterium johnsoniae UW101]  
 >gil71143549|gblAAZ24022.1| prolyl endopeptidase [Colwellia psychrerythraea 34H]  
 >gil83855898|refl|ZP\_00949427.1| Prolyl endopeptidase [Croceibacter atlanticus HTCC2559]  
 >gil85710915|refl|ZP\_01041976.1| Prolyl endopeptidase [Idiomarina baltica OS145]  
 >gil78368715|refl|ZP\_00838926.1| Prolyl oligopeptidase [Shewanella sp. PV-4]  
 >gil56178266|gblAAV80988.1| Prolyl endopeptidase [Idiomarina loihiensis L2TR]  
 >gil91215481|refl|ZP\_01252452.1| Prolyl endopeptidase [Psychroflexus torquis ATCC 700755]  
 >gil78688320|refl|ZP\_00853025.1| Prolyl oligopeptidase [Shewanella sp. ANA-3]  
 >gil24374294|refl|NP\_718337.1| prolyl endopeptidase [Shewanella oneidensis MR-1]  
 >gil456523|embl|CAA45213.1| proline-specific endopeptidase; prolyl endopeptidase [Elizabethkingia meningoseptica]  
 >gil77816782|refl|ZP\_00815936.1| Prolyl oligopeptidase [Shewanella putrefaciens CN-32]  
 >gil68547790|refl|ZP\_00587318.1| Prolyl oligopeptidase [Shewanella amazonensis SB2B]  
 >gil82744257|refl|ZP\_00906837.1| Prolyl oligopeptidase [Shewanella sp. W3-18-1]  
 >gil86131249|refl|ZP\_01049848.1| Prolyl endopeptidase [Cellulophaga sp. MED134]  
 >gil88796133|refl|ZP\_01111815.1| Prolyl endopeptidase [Alteromonas macleodii 'Deep ecotype']  
 >gil42526704|refl|NP\_971802.1| prolyl endopeptidase [Treponema denticola ATCC 35405]  
 >gil27367204|refl|NP\_762731.1| Serine protease of the peptidase family S9A [Vibrio vulnificus CMCP6]  
 >gil37676919|refl|NP\_937315.1| serine protease [Vibrio vulnificus YJ016]  
 >gil75855979|refl|ZP\_00763616.1| COG1505: Serine proteases of the peptidase family S9A [Vibrio sp. Ex25]

>gil28809898|dbj|BAC62839.1| prolyl endopeptidase [*Vibrio parahaemolyticus* RIMD 2210633]  
 >gil6460324|gb|AAF12044.1|AE002079\_9 prolyl endopeptidase [*Deinococcus radiodurans* R1]  
 >gil91223249|ref|ZP\_01258515.1| prolyl endopeptidase [*Vibrio alginolyticus* 12G01]  
 >gil56180108|gb|AAV82830.1| Prolyl endopeptidase [*Idiomarina loihiensis* L2TR]  
 >gil55769741|ref|XP\_549860.1| putative prolyl endopeptidase [*Oryza sativa* (japonica cultivar-group)]  
 >gil47507507|gb|AAH71008.1| PREP protein [*Xenopus laevis*]  
 >gil28502989|gb|AAH47161.1| PREP protein [*Xenopus laevis*]  
 >gil86144914|ref|ZP\_01063246.1| prolyl endopeptidase [*Vibrio* sp. MED222]  
 >gil84386759|ref|ZP\_00989784.1| prolyl endopeptidase [*Vibrio splendidus* 12B01]  
 >gil63100723|gb|AAH95363.1| Zgc:110670 [*Danio rerio*]  
 >gil38649021|gb|AAH63222.1| Prolyl endopeptidase [*Xenopus tropicalis*]  
 >gil59711729|ref|YP\_204505.1| prolyl endopeptidase [*Vibrio fischeri* ES114]  
 >gil6755152|ref|NP\_035286.1| prolyl endopeptidase [*Mus musculus*]  
 >gil74215349|dbj|BAE41885.1| unnamed protein product [*Mus musculus*]  
 >gil50514023|pdb|1VZ3|A Chain A, Prolyl Oligopeptidase From Porcine Brain, T597c Mutant  
 >gil26345256|dbj|BAC36278.1| unnamed protein product [*Mus musculus*]  
 >gil157879458|pdb|1O6G|A Chain A, Prolyl Oligopeptidase From Porcine Brain, D641n Mutant With Bound Peptide Ligand  
 >gil51592147|ref|NP\_001004050.1| prolyl endopeptidase [*Sus scrofa*]  
 >gil10835490|pdb|1E5T|A Chain A, Prolyl Oligopeptidase From Porcine Brain, Mutant  
 >gil50514022|pdb|1VZ2|A Chain A, Prolyl Oligopeptidase From Porcine Brain, Y73cV427CC255T Mutant  
 >gil37928243|pdb|1UOQ|A Chain A, Prolyl Oligopeptidase From Porcine Brain, S554a Mutant With Bound Peptide Ligand Glu-Phe-Ser-Pro  
 >gil27065055|pdb|1H2Y|A Chain A, Prolyl Oligopeptidase From Porcine Brain, Y473f Mutant With Covalently Bound Inhibitor Z-Pro-Prolinal  
 >gil5103285|dbj|BAA78907.1| prolyl oligopeptidase [*Bos taurus*]  
 >gil13786144|ref|NP\_112614.1| prolyl endopeptidase [*Rattus norvegicus*]  
 >gil5107662|pdb|1QFM|A Chain A, Prolyl Oligopeptidase From Porcine Muscle  
 >gil79382269|ref|NP\_177741.3| prolyl oligopeptidase [*Arabidopsis thaliana*]

>gil27066372|pdb|1O6F|A Chain A, Prolyl Oligopeptidase From Porcine Brain, D641a Mutant With Bound Peptide Ligand Suc-Gly-Pro-replaced original

>gil19347837|gb|AAL86330.1| putative prolyl endopeptidase [*Arabidopsis thaliana*]

>gil109072195|ref|XP\_001087580.1| PREDICTED: similar to prolyl endopeptidase [*Macaca mulatta*]

>gil11691900|dbj|BAB19053.1| prolyl oligopeptidase [*Homo sapiens*]

>gil41349456|ref|NP\_002717.3| prolyl endopeptidase [*Homo sapiens*]

>gil558596|emb|CAA52605.1| prolyl oligopeptidase [*Homo sapiens*]

>gil53127346|emb|CAG31056.1| hypothetical protein [*Gallus gallus*]

>gil904214|dbj|BAA04661.1| prolyl endopeptidase [*Homo sapiens*]

>gil15217929|ref|NP\_173463.1| prolyl oligopeptidase, putative / prolyl endopeptidase, putative / post-proline cleaving enzyme, putative [*Arabidopsis thaliana*]

>gil9558588|gb|AAF88151.1|AC026234\_2 Contains similarity to a rPOP protein from *Rattus norvegicus* gil3043760 and is a member of the prolyl oligopeptidase family PF00326. ESTs gb|AA651190, gb|H36145 come from this gene. [*Arabidopsis thaliana*]

>gil38345850|emb|CAE01849.2| OSJNBa0084K11.14 [*Oryza sativa* (japonica cultivar-group)]

>gil91082735|ref|XP\_972959.1| PREDICTED: similar to CG5355-PA [*Tribolium castaneum*]

>gil54650756|gb|AAV36957.1| LP07359p [*Drosophila melanogaster*]

>gil73973662|ref|XP\_539066.2| PREDICTED: similar to prolyl endopeptidase isoform 1 [*Canis familiaris*]

>gil73973660|ref|XP\_868346.1| PREDICTED: similar to prolyl endopeptidase isoform 5 [*Canis familiaris*]

>gil47222200|emb|CAG11079.1| unnamed protein product [*Tetraodon nigroviridis*]

>gil73973664|ref|XP\_854289.1| PREDICTED: similar to Prolyl endopeptidase (Post-proline cleaving enzyme) (PE) isoform 2 [*Canis familiaris*]

>gil55235507|gb|EAA14977.2| ENSANGP00000016749 [*Anopheles gambiae* str. PEST]-been replaced

>gil73973658|ref|XP\_868343.1| PREDICTED: similar to prolyl endopeptidase isoform 4 [*Canis familiaris*]

>gil71666762|ref|XP\_820337.1| prolyl oligopeptidase, putative [*Trypanosoma cruzi* strain CL Brener]

>gil49523575|emb|CAD42967.1| prolyl oligopeptidase [*Trypanosoma brucei*]

>gil71747962|ref|XP\_823036.1| prolyl oligopeptidase [*Trypanosoma brucei* TREU927]

>gil33317309|gb|AAQ04681.1|AF452421\_1 80 kDa prolyl oligopeptidase [*Trypanosoma cruzi*]

>gil47224662|emb|CAG03646.1| unnamed protein product [*Tetraodon nigroviridis*]

>gil15291259|gb|AAK92898.1| GH13952p [Drosophila melanogaster]

>gil73973656|ref|XP\_868339.1| PREDICTED: similar to Prolyl endopeptidase (Post-proline cleaving enzyme) (PE) isoform 3 [Canis familiaris]

| <b>SC PEP PYMOL Numbering</b> | <b>Clustal W alignment numbering</b> |
|-------------------------------|--------------------------------------|
| <b>M102L</b>                  | <b>M178</b>                          |
| <b>K103T</b>                  | <b>K179</b>                          |
| <b>R110K</b>                  | <b>R186</b>                          |
| <b>F227Y</b>                  | <b>F315</b>                          |
| <b>I284L</b>                  | <b>I381</b>                          |
| <b>V301L</b>                  | <b>V398</b>                          |
| <b>N303Q</b>                  | <b>N400</b>                          |
| <b>K305S</b>                  | <b>K407</b>                          |
| <b>V323I</b>                  | <b>V434</b>                          |
| <b>I343L/V</b>                | <b>I454</b>                          |
| <b>V344I</b>                  | <b>V455</b>                          |
| <b>V346I</b>                  | <b>V457</b>                          |
| <b>S351P</b>                  | <b>S462</b>                          |
| <b>P353S</b>                  | <b>P473</b>                          |
| <b>R354K</b>                  | <b>R474</b>                          |
| <b>I371V</b>                  | <b>I506</b>                          |
| <b>I381L</b>                  | <b>I516</b>                          |

|              |             |
|--------------|-------------|
| <b>I406V</b> | <b>I542</b> |
| <b>V434I</b> | <b>V570</b> |
| <b>L452V</b> | <b>L597</b> |
| <b>F459Y</b> | <b>F607</b> |
| <b>V474I</b> | <b>V622</b> |
| <b>R481K</b> | <b>R629</b> |
| <b>V500I</b> | <b>V651</b> |
| <b>M511L</b> | <b>M686</b> |
| <b>I514V</b> | <b>I689</b> |
| <b>I581V</b> | <b>I757</b> |
| <b>Y669F</b> | <b>Y855</b> |
| <b>I687V</b> | <b>I880</b> |

**Supplemental Figure 2a.** List of 1<sup>st</sup> generation variants with their corresponding mutations. Variant numbers are listed in the 1<sup>st</sup> column and mutations are listed along the row. A “1” in a given cell highlighted in purple for enhanced identification indicates that the mutation was incorporated into that variant.

| Variant # | M102L | K103T | R110K | F227Y | I284L | V301L | N303Q | K305S | V323I | I343L | I343V | V344I | V346I | S351P | P353S | R354K | I371V | I381L | I406V | V434I | L452V | F459Y | V474I | R481K | V500I | M511L | I514V | I581V | Y669F | I687V |   |   |   |   |  |
|-----------|-------|-------|-------|-------|-------|-------|-------|-------|-------|-------|-------|-------|-------|-------|-------|-------|-------|-------|-------|-------|-------|-------|-------|-------|-------|-------|-------|-------|-------|-------|---|---|---|---|--|
| 6609      |       |       |       |       |       |       | 1     |       |       | 1     |       |       |       |       |       |       |       |       |       | 1     |       |       |       |       |       |       |       |       |       | 1     |   |   |   |   |  |
| 6610      |       |       |       |       |       |       |       |       |       |       |       |       |       |       |       |       |       |       |       | 1     |       |       |       |       |       |       |       |       |       |       | 1 | 1 |   |   |  |
| 6611      |       |       |       | 1     |       |       | 1     |       |       |       |       |       |       |       |       |       |       |       |       |       |       |       |       |       |       |       |       |       |       | 1     |   |   |   |   |  |
| 6612      |       |       |       |       |       |       |       |       | 1     |       | 1     | 1     |       |       |       |       |       |       |       |       |       |       |       |       |       |       |       |       |       |       |   |   |   |   |  |
| 6613      |       |       |       |       | 1     |       |       |       |       |       |       |       | 1     |       |       |       |       |       |       |       |       |       |       |       |       |       |       | 1     |       |       |   |   |   |   |  |
| 6614      |       | 1     |       |       | 1     |       | 1     |       |       |       |       |       |       |       |       |       |       |       |       |       |       |       |       |       |       |       |       |       |       |       |   |   |   |   |  |
| 6615      |       |       |       |       | 1     | 1     |       |       |       |       |       |       |       |       |       |       |       |       |       |       |       |       |       |       |       |       |       |       |       |       |   |   |   |   |  |
| 6617      |       |       | 1     | 1     |       |       |       | 1     |       |       |       |       |       |       |       |       |       |       |       |       |       |       |       |       |       |       |       |       |       |       |   |   |   |   |  |
| 6618      |       |       |       |       |       | 1     |       |       |       |       |       |       |       |       | 1     |       |       |       |       |       | 1     |       |       |       |       |       |       |       |       |       |   |   |   |   |  |
| 6619      |       |       |       |       |       |       |       |       | 1     |       |       |       |       |       | 1     | 1     |       |       |       |       |       |       |       |       |       |       |       |       |       |       |   |   |   |   |  |
| 6620      |       |       | 1     |       |       |       |       |       |       |       | 1     |       |       |       |       |       | 1     |       |       |       |       |       |       |       |       |       |       |       |       |       |   |   |   |   |  |
| 6621      | 1     |       |       |       |       |       |       |       |       |       |       |       |       |       | 1     | 1     |       |       |       |       |       |       |       |       |       |       |       |       |       |       |   |   |   |   |  |
| 6622      |       |       |       |       |       |       |       |       |       |       | 1     |       | 1     |       |       |       |       |       |       |       |       |       |       |       |       |       |       |       |       |       |   |   | 1 |   |  |
| 6623      |       |       |       |       |       |       |       |       |       |       |       |       |       |       |       |       |       |       |       |       |       | 1     |       |       | 1     |       |       | 1     |       |       |   |   |   |   |  |
| 6624      |       |       |       | 1     |       |       |       |       |       |       |       |       |       |       |       |       |       |       |       |       |       |       |       | 1     |       |       |       |       |       |       |   |   |   |   |  |
| 6625      | 1     |       |       |       |       | 1     |       |       |       |       |       |       |       |       |       |       |       |       |       |       |       | 1     |       |       |       |       |       |       |       |       |   |   |   |   |  |
| 6626      |       |       |       |       |       |       |       | 1     |       |       |       |       | 1     |       |       |       |       |       |       |       |       |       |       |       |       | 1     |       |       |       |       |   |   |   |   |  |
| 6627      |       | 1     |       |       |       |       |       | 1     | 1     |       |       |       |       |       |       |       |       |       |       |       |       |       |       |       |       |       |       |       |       |       |   |   |   |   |  |
| 6628      |       |       | 1     |       |       |       |       |       |       |       |       |       |       |       |       |       |       |       |       |       |       |       |       |       |       |       |       |       |       |       |   |   |   |   |  |
| 6629      |       |       |       |       |       |       |       |       |       | 1     |       |       |       |       |       |       |       |       |       |       |       |       | 1     |       |       |       |       | 1     |       |       |   |   |   |   |  |
| 6630      |       | 1     |       |       |       |       |       |       |       |       |       |       |       |       |       |       |       |       |       |       |       | 1     |       |       |       |       |       |       |       |       |   |   |   |   |  |
| 6631      |       |       |       |       |       |       |       |       |       |       |       |       |       |       |       |       |       | 1     |       |       |       | 1     |       |       |       |       |       |       |       |       |   |   |   |   |  |
| 6632      | 1     |       |       |       |       |       |       |       |       |       | 1     |       |       |       |       |       |       |       |       |       |       |       | 1     |       |       |       |       |       |       |       |   |   |   |   |  |
| 6633      | 1     |       |       |       |       |       |       |       |       |       |       | 1     |       |       |       |       |       |       |       |       |       |       |       | 1     |       |       |       |       |       |       |   |   |   |   |  |
| 6634      |       | 1     | 1     |       |       |       |       |       |       |       |       |       | 1     |       |       |       |       |       |       |       |       |       | 1     |       |       |       |       |       |       |       |   |   |   |   |  |
| 6635      |       |       |       |       |       | 1     |       |       |       |       |       |       |       |       | 1     |       |       |       |       |       |       |       |       |       |       |       |       |       | 1     |       |   |   |   |   |  |
| 6636      |       |       |       |       |       |       |       |       |       |       |       |       |       |       | 1     |       |       |       |       |       |       | 1     |       |       |       |       |       |       |       |       |   |   |   | 1 |  |
| 6637      |       |       |       |       |       |       |       | 1     |       |       |       |       | 1     |       |       |       |       |       |       |       |       |       |       |       |       | 1     |       |       |       |       |   |   |   |   |  |
| 6638      |       |       |       | 1     | 1     |       |       |       |       |       |       |       |       |       |       |       |       |       |       |       |       | 1     |       |       |       |       |       |       |       |       |   |   |   |   |  |
| 6639      |       |       |       |       |       |       |       |       |       |       |       |       |       |       |       |       |       |       |       |       |       |       |       |       |       |       | 1     | 1     |       |       |   |   |   | 1 |  |
| 6640      |       |       |       |       |       |       |       |       |       |       |       |       |       |       |       | 1     |       |       |       |       |       |       | 1     |       |       |       |       |       | 1     |       |   |   |   |   |  |
| 6641      |       |       |       |       |       |       | 1     |       |       |       | 1     |       |       |       |       |       |       |       |       |       |       |       | 1     |       |       |       | 1     |       |       |       |   |   |   |   |  |
| 6642      |       |       |       |       |       |       |       |       |       | 1     | 1     |       |       |       |       |       | 1     | 1     | 1     |       |       |       | 1     |       |       |       |       |       |       |       |   |   |   |   |  |
| 6643      |       |       |       |       |       |       |       |       |       | 1     |       |       |       |       |       | 1     | 1     | 1     |       |       |       |       |       |       |       |       |       |       |       |       |   |   |   |   |  |
| 6644      |       |       |       |       |       |       |       |       |       |       |       |       |       |       |       |       |       |       |       |       |       |       |       |       |       |       |       |       |       |       |   |   |   |   |  |
| 6645      |       |       | 1     |       |       |       |       |       |       |       |       | 1     |       |       |       |       |       |       |       |       |       | 1     | 1     |       |       |       |       | 1     |       |       |   |   |   | 1 |  |
| 6646      |       |       |       |       |       |       |       | 1     |       |       |       |       |       |       |       |       |       |       |       |       |       | 1     | 1     |       |       |       |       |       |       |       |   |   |   |   |  |
| 6647      |       |       |       |       | 1     |       |       |       |       |       |       |       |       |       |       | 1     |       |       |       |       |       |       | 1     | 1     |       |       |       |       |       |       |   |   |   | 1 |  |
| 6648      |       |       |       | 1     |       |       |       |       |       | 1     |       |       |       | 1     |       | 1     |       |       |       |       |       |       |       |       |       |       | 1     |       |       |       |   |   |   |   |  |
| 6649      |       |       |       |       |       | 1     |       |       |       |       |       |       |       | 1     |       |       |       |       |       |       |       |       |       |       |       |       |       |       |       |       |   |   |   |   |  |
| 6650      | 1     |       |       | 1     |       |       |       |       |       |       |       |       |       |       |       |       | 1     |       |       |       |       |       |       |       |       |       |       |       |       |       |   |   |   |   |  |
| 6651      |       |       |       |       |       |       | 1     |       |       | 1     |       |       |       |       |       |       |       |       |       |       |       |       | 1     |       |       |       |       |       |       |       |   |   |   |   |  |
| 6652      |       | 1     |       |       |       |       |       |       |       |       | 1     |       |       |       |       |       |       |       |       |       |       |       |       |       |       |       |       |       |       |       |   |   |   |   |  |
| 6653      |       |       |       |       |       |       |       |       |       |       | 1     |       |       |       |       |       |       |       |       |       |       |       |       |       |       |       |       |       |       |       |   |   |   |   |  |
| 6654      |       | 1     |       |       |       |       |       |       |       |       |       | 1     |       |       |       |       |       |       |       |       |       |       | 1     |       |       |       |       | 1     |       |       |   |   |   |   |  |
| 6655      | 1     |       | 1     |       | 1     |       |       |       |       | 1     | 1     |       |       |       |       |       |       |       |       |       |       |       |       |       |       |       |       |       |       |       |   |   |   |   |  |
| 6656      |       |       |       |       |       | 1     | 1     | 1     |       |       |       |       |       |       |       |       |       |       |       |       |       |       |       |       |       |       |       |       |       |       |   |   |   |   |  |



**Supplemental Figure 2b.** List of 2<sup>nd</sup> generation variants with their corresponding mutations. Variant numbers are listed in the 1<sup>st</sup> column and mutations are listed along the row. A “1” in a given cell highlighted in purple for enhanced identification indicates that the mutation was incorporated into that variant.

| Variant # | M102L | K103T | R110K | F227Y | I284L | V301L | N303Q | K305S | V323I | I343L | I343V | V344I | V346I | S351P | P353S | R354K | I371V | I381L | I406V | V434I | L452V | F459Y | V474I | R481K | V500I | M511L | I514V | I581V | Y669F | I687V |  |
|-----------|-------|-------|-------|-------|-------|-------|-------|-------|-------|-------|-------|-------|-------|-------|-------|-------|-------|-------|-------|-------|-------|-------|-------|-------|-------|-------|-------|-------|-------|-------|--|
| 10184     |       |       |       |       |       |       |       |       |       |       |       |       |       |       |       |       |       |       |       |       |       | 1     |       |       |       |       |       | 1     |       |       |  |
| 10185     |       | 1     |       |       |       |       |       |       |       |       |       |       |       | 1     |       |       | 1     |       |       |       |       |       | 1     |       |       |       |       | 1     | 1     |       |  |
| 10186     |       |       |       |       |       |       |       |       | 1     |       |       |       |       |       |       |       |       |       |       |       |       |       |       |       |       |       |       | 1     | 1     |       |  |
| 10187     |       |       |       |       |       |       |       |       | 1     |       |       |       |       |       |       |       |       | 1     |       |       |       |       | 1     |       |       |       |       |       | 1     |       |  |
| 10188     |       |       |       |       |       |       |       |       |       | 1     |       |       |       |       | 1     |       |       |       |       |       |       | 1     | 1     |       |       |       |       |       |       |       |  |
| 10189     |       | 1     |       |       |       |       |       |       |       | 1     |       |       |       |       | 1     |       |       | 1     |       |       |       | 1     | 1     |       |       | 1     |       |       | 1     |       |  |
| 10190     |       |       |       |       |       |       |       |       | 1     |       | 1     |       |       |       | 1     |       |       |       |       |       |       |       |       |       |       |       |       |       | 1     |       |  |
| 10191     |       | 1     |       |       |       |       |       |       | 1     |       |       |       |       |       |       |       |       |       |       |       |       |       |       |       |       |       |       |       | 1     |       |  |
| 10192     |       |       |       |       |       |       |       |       |       |       |       |       |       |       |       |       |       |       |       | 1     | 1     |       |       |       |       |       |       |       | 1     |       |  |
| 10193     |       |       |       |       |       |       |       |       |       |       |       |       |       |       | 1     |       |       | 1     |       |       |       |       |       |       |       |       |       |       |       |       |  |
| 10194     |       | 1     |       |       |       |       |       | 1     | 1     |       |       |       |       |       |       |       | 1     |       |       |       |       |       |       |       |       |       |       |       | 1     |       |  |
| 10195     |       | 1     |       |       |       |       |       |       |       |       |       |       |       |       | 1     |       |       |       |       |       | 1     |       |       |       |       |       |       |       | 1     |       |  |
| 10196     |       |       |       |       |       |       |       |       |       | 1     |       |       |       |       |       |       |       |       |       | 1     |       |       |       |       |       |       | 1     |       | 1     |       |  |
| 10197     |       |       |       |       | 1     |       |       |       |       |       | 1     |       |       |       |       |       |       |       |       | 1     |       |       |       |       |       |       |       |       | 1     |       |  |
| 10198     |       |       |       |       |       |       |       | 1     |       |       |       |       |       |       |       |       |       |       |       | 1     |       |       |       |       |       | 1     |       |       |       |       |  |
| 10199     |       | 1     |       |       |       |       |       |       | 1     |       |       | 1     |       |       | 1     |       |       | 1     |       | 1     |       |       |       |       |       | 1     |       |       | 1     |       |  |
| 10200     |       |       |       |       | 1     |       |       |       |       |       |       |       |       |       | 1     |       |       |       |       |       |       |       |       |       |       |       |       | 1     |       | 1     |  |
| 10201     |       |       |       |       |       |       |       |       |       |       |       |       |       |       |       |       |       |       |       |       |       | 1     | 1     |       |       |       | 1     |       | 1     |       |  |
| 10202     |       |       |       |       |       |       |       |       |       |       |       | 1     |       |       | 1     |       |       |       |       |       |       |       |       |       |       |       |       |       |       |       |  |
| 10203     |       | 1     |       |       |       |       |       |       |       |       |       |       |       |       |       |       |       |       |       | 1     |       |       |       |       |       |       |       |       |       |       |  |
| 10204     |       |       |       |       |       |       |       |       |       |       |       |       |       |       | 1     |       |       |       |       | 1     |       |       |       |       |       |       |       |       |       |       |  |
| 10205     |       |       |       |       |       |       |       |       |       |       |       |       |       |       | 1     |       |       |       |       | 1     |       |       |       |       |       |       |       |       | 1     |       |  |
| 10206     |       |       |       |       |       |       |       | 1     |       |       |       |       |       |       |       |       |       |       |       | 1     | 1     |       |       |       |       |       | 1     | 1     | 1     |       |  |
| 10207     |       |       |       |       |       |       |       |       |       |       | 1     |       |       |       |       |       |       |       | 1     |       |       |       |       |       |       |       |       |       | 1     |       |  |
| 10208     |       |       |       |       |       |       |       |       |       |       |       |       |       |       |       |       |       |       |       |       |       |       |       |       |       |       |       |       |       |       |  |
| 10209     | 1     |       |       |       |       |       |       |       |       |       |       |       |       | 1     | 1     |       |       | 1     |       |       |       |       |       |       |       |       |       |       | 1     |       |  |
| 10210     |       |       |       |       |       |       |       |       |       |       |       |       |       |       |       |       |       |       |       |       |       |       |       |       |       |       |       |       |       |       |  |
| 10211     |       |       |       |       | 1     |       |       |       |       |       |       |       |       |       |       |       |       |       |       |       |       |       |       |       |       |       | 1     |       | 1     |       |  |
| 10212     |       |       |       |       |       |       |       |       |       | 1     |       |       |       |       |       |       |       |       |       |       |       | 1     |       |       |       |       |       |       | 1     |       |  |
| 10213     |       |       |       |       |       |       |       | 1     |       |       |       |       |       |       |       |       |       |       |       |       |       |       |       |       |       |       |       |       |       |       |  |
| 10214     | 1     |       |       |       |       |       |       |       |       |       | 1     |       |       |       | 1     |       |       |       |       |       |       |       |       |       |       |       |       |       |       |       |  |
| 10215     |       |       |       |       |       |       |       | 1     |       |       |       |       |       |       |       |       |       |       |       |       |       |       |       |       |       |       |       |       |       |       |  |
| 10216     |       | 1     |       |       |       |       |       |       |       |       | 1     |       |       |       |       |       |       |       |       |       |       |       |       |       |       |       |       |       |       |       |  |
| 10217     |       |       |       |       |       |       |       |       | 1     | 1     |       |       |       |       |       |       |       |       |       |       |       |       |       |       |       |       |       |       |       |       |  |
| 10218     |       | 1     |       |       |       |       |       |       |       |       | 1     |       |       |       |       |       |       |       |       |       |       |       |       |       |       |       |       |       |       |       |  |
| 10219     |       |       |       |       |       |       |       | 1     |       |       |       |       |       |       |       |       |       |       |       | 1     |       |       |       |       |       |       |       |       |       |       |  |
| 10220     |       |       |       |       |       |       |       |       | 1     |       |       |       |       |       | 1     | 1     |       |       |       |       |       |       |       |       |       |       |       |       |       |       |  |
| 10221     |       |       |       |       |       |       |       |       | 1     |       | 1     |       |       |       |       |       |       |       |       |       |       |       |       |       |       |       |       |       |       |       |  |
| 10222     |       |       |       |       |       | 1     |       |       |       |       |       |       |       |       |       |       |       |       |       |       |       |       |       |       |       |       |       |       |       |       |  |
| 10223     | 1     |       |       |       |       |       |       |       |       |       |       | 1     |       |       |       |       |       |       |       |       |       |       |       |       |       |       |       |       |       |       |  |
| 10224     |       |       |       |       | 1     |       |       |       |       |       |       |       |       |       | 1     |       |       | 1     |       |       |       |       |       |       |       |       |       |       |       |       |  |
| 10225     |       | 1     |       |       |       |       |       |       |       |       | 1     |       |       |       |       |       |       |       |       |       |       |       |       |       |       |       |       |       |       |       |  |
| 10226     |       |       |       |       |       |       |       |       | 1     |       |       |       |       |       | 1     |       |       |       |       |       |       |       |       |       |       |       |       |       |       |       |  |
| 10227     |       |       |       |       |       |       |       |       |       |       |       | 1     |       |       |       |       |       |       |       |       |       |       |       |       |       |       |       |       |       |       |  |
| 10228     |       |       |       |       |       |       | 1     |       |       |       | 1     |       |       |       |       |       |       |       |       |       |       |       |       |       |       |       |       |       |       |       |  |
| 10229     | 1     |       |       |       |       | 1     |       |       |       |       |       |       |       |       |       |       |       |       |       |       |       |       |       |       |       |       |       |       |       |       |  |
| 10230     |       |       |       |       | 1     |       |       |       |       |       |       |       |       |       |       |       |       |       |       |       |       |       |       |       |       |       |       |       |       |       |  |
| 10231     |       |       |       |       |       |       |       |       |       |       |       |       |       |       | 1     | 1     |       |       |       |       |       |       |       |       |       |       |       |       |       |       |  |
